# Supplementary material for: A Density Functional Study on Ethylene Trimerization and Tetramerization Using Real Sasol Cr-PNP Catalysts
Source: MDPI journal article supplement (doi:10.3390/molecules28073101), 2023-03-30
Supplement: s1 [file s1]

# A Density Functional Study on Ethylene Trimerization and Tetramerization Using Real Sasol Cr-PNP Catalyst

Minserk Cheong \* and Ajeet Singh

Department of Chemistry and Research Institute for Basic Sciences, Kyung Hee University,  
Seoul 02447, Republic of Korea

## Cartesian Coordinates (Å) of B3LYP/6-31G\*/LanL2DZ Optimized Geometries in Figures 3 and 4

|    |    |             |             |             |    |   |             |             |             |
|----|----|-------------|-------------|-------------|----|---|-------------|-------------|-------------|
| 1  | 1R |             |             |             | 33 | C | -1.96929800 | -2.07634100 | -1.96105100 |
| 2  | N  | -0.04670600 | 0.20396100  | -1.00746100 | 34 | C | -2.65185700 | -3.20529800 | -2.42208400 |
| 3  | P  | 1.28325600  | -0.05068200 | 0.07383300  | 35 | C | -3.84845400 | -3.57921800 | -1.81418600 |
| 4  | P  | -1.56445600 | 0.11172700  | -0.14939400 | 36 | C | -3.67407800 | -1.71423600 | -0.28828600 |
| 5  | Cr | -0.25086200 | -0.59025600 | 2.14317900  | 37 | C | -4.36457000 | -2.84052800 | -0.74560500 |
| 6  | C  | -0.45554600 | 1.25724100  | 3.75855200  | 38 | O | -4.08494000 | -0.93290700 | 0.75532100  |
| 7  | C  | -1.29954600 | 0.28310000  | 4.18214900  | 39 | C | 4.56257600  | -1.71795300 | 2.24091200  |
| 8  | C  | -0.21906800 | -3.05555200 | 1.75118900  | 40 | C | 4.19552600  | 1.07796800  | -3.20228900 |
| 9  | C  | -0.70394400 | -2.91853400 | 3.00692500  | 41 | C | -0.61989200 | 4.22665500  | 0.94381400  |
| 10 | C  | 0.06011600  | 0.85032000  | -2.33094100 | 42 | C | -5.35276300 | -1.19250800 | 1.35161100  |
| 11 | C  | 2.24931100  | -1.46621900 | -0.59125000 | 43 | H | 0.53466600  | 1.37286100  | 4.19404600  |
| 12 | C  | 2.42094700  | 1.39257500  | 0.00583500  | 44 | H | -1.01865500 | -0.40824600 | 4.97289600  |
| 13 | C  | -2.52696600 | 1.57081300  | -0.72651400 | 45 | H | -2.32975900 | 0.23858600  | 3.83475400  |
| 14 | C  | -2.46598500 | -1.30897500 | -0.90221700 | 46 | H | -0.88010400 | -3.11444600 | 0.88968900  |
| 15 | C  | 3.27937700  | -1.98473600 | 0.22484600  | 47 | H | -1.77315000 | -2.86873900 | 3.20033700  |
| 16 | C  | 4.01166100  | -3.10645600 | -0.17761500 | 48 | H | -0.05172300 | -2.96169800 | 3.87664500  |
| 17 | C  | 3.71479600  | -3.72344000 | -1.39533300 | 49 | H | -0.77899100 | 2.01283800  | 3.04719800  |
| 18 | C  | 1.96786900  | -2.11236000 | -1.79830000 | 50 | H | 0.84115700  | -3.20572600 | 1.56309800  |
| 19 | C  | 2.69278900  | -3.23394800 | -2.20661500 | 51 | H | 4.80611800  | -3.50250300 | 0.44429000  |
| 20 | O  | 3.47711400  | -1.32470600 | 1.40654200  | 52 | H | 4.28763900  | -4.59384000 | -1.70205400 |
| 21 | C  | 2.46176200  | 2.20052400  | 1.15115800  | 53 | H | 1.17758300  | -1.72868900 | -2.43330400 |
| 22 | C  | 3.32204900  | 3.29318700  | 1.25648100  | 54 | H | 2.46185500  | -3.71667300 | -3.15131600 |
| 23 | C  | 4.17046800  | 3.58767900  | 0.19043700  | 55 | H | 1.80907000  | 1.94837000  | 1.98249700  |
| 24 | C  | 3.29785400  | 1.70331800  | -1.06238900 | 56 | H | 3.33847900  | 3.89650000  | 2.15910700  |
| 25 | C  | 4.16364700  | 2.80111100  | -0.96190200 | 57 | H | 4.85098900  | 4.43241200  | 0.24979800  |
| 26 | O  | 3.24591200  | 0.89601800  | -2.15453500 | 58 | H | 4.83418500  | 3.04753100  | -1.77663200 |
| 27 | C  | -2.18116700 | 2.85907500  | -0.25635800 | 59 | H | -2.66759400 | 4.96682600  | -0.28714300 |
| 28 | C  | -2.92546900 | 3.97796100  | -0.64627900 | 60 | H | -4.58530400 | 4.70125200  | -1.79882000 |
| 29 | C  | -4.01536400 | 3.82430200  | -1.50534000 | 61 | H | -3.89435300 | 0.47191000  | -1.96952700 |
| 30 | C  | -3.62333400 | 1.45168600  | -1.59102600 | 62 | H | -5.21144800 | 2.44519400  | -2.65580200 |
| 31 | C  | -4.36831900 | 2.56436900  | -1.98252400 | 63 | H | -1.03352500 | -1.78953300 | -2.42703600 |
| 32 | O  | -1.09236200 | 2.93304800  | 0.57023700  | 64 | H | -2.25188000 | -3.78224100 | -3.25013800 |

|     |             |             |             |             |     |   |             |             |             |
|-----|-------------|-------------|-------------|-------------|-----|---|-------------|-------------|-------------|
| 65  | H           | -4.39032000 | -4.45284200 | -2.16472600 | 109 | C | -3.68188000 | 3.00661700  | -2.02118200 |
| 66  | H           | -5.29417800 | -3.14748600 | -0.28049700 | 110 | O | -0.87054900 | 2.62744400  | 1.04514100  |
| 67  | H           | 1.00529000  | 0.57688400  | -2.79947500 | 111 | C | -1.98310000 | -2.37426800 | -1.51412800 |
| 68  | H           | -0.76552800 | 0.52738000  | -2.97115900 | 112 | C | -2.78885500 | -3.45944300 | -1.86038100 |
| 69  | H           | 0.01915900  | 1.94236100  | -2.24294200 | 113 | C | -4.12772800 | -3.46780700 | -1.47333800 |
| 70  | H           | 4.43485500  | -2.74375700 | 2.60823300  | 114 | C | -3.84587000 | -1.32867400 | -0.37526100 |
| 71  | H           | 5.51858100  | -1.63615100 | 1.71069000  | 115 | C | -4.65845400 | -2.41199700 | -0.73060100 |
| 72  | H           | 4.55534000  | -1.02632600 | 3.08447800  | 116 | O | -4.27322800 | -0.27810100 | 0.37824900  |
| 73  | H           | 5.22145900  | 1.00114300  | -2.82435500 | 117 | C | 0.47629900  | -3.80402600 | 1.77127300  |
| 74  | H           | 4.00839000  | 0.27009000  | -3.91062500 | 118 | C | 5.65727500  | 0.26987400  | 0.71179200  |
| 75  | H           | 4.05852700  | 2.04370600  | -3.70336300 | 119 | C | -0.40350300 | 3.78137000  | 1.74724800  |
| 76  | H           | 0.30316100  | 4.05887200  | 1.49842300  | 120 | C | -5.63410200 | -0.23509000 | 0.80316400  |
| 77  | H           | -0.39949600 | 4.83606100  | 0.05994700  | 121 | H | 2.14360700  | -4.93915600 | 0.27465800  |
| 78  | H           | -1.34577600 | 4.74959200  | 1.57818800  | 122 | H | 3.76855600  | -5.08983800 | -1.55930900 |
| 79  | H           | -5.37558700 | -2.17883800 | 1.83140200  | 123 | H | 3.42351000  | -0.86742500 | -2.25302600 |
| 80  | H           | -5.49168400 | -0.41710000 | 2.10618500  | 124 | H | 4.41684500  | -3.05944400 | -2.84869300 |
| 81  | H           | -6.15839300 | -1.12793900 | 0.61100300  | 125 | H | 0.85223200  | 2.38827300  | -1.70582100 |
| 82  |             |             |             |             | 126 | H | 2.23601500  | 4.34060400  | -2.32233700 |
| 83  | <b>1SC1</b> |             |             |             | 127 | H | 4.65163700  | 4.38082400  | -1.70512900 |
| 84  | N           | -0.00326500 | -0.02875300 | -1.29708900 | 128 | H | 5.64910100  | 2.50378500  | -0.46822600 |
| 85  | P           | 1.36349300  | -0.07488800 | -0.24349200 | 129 | H | -2.06938300 | 4.93795300  | 0.26686800  |
| 86  | P           | -1.37010900 | 0.05917200  | -0.24722000 | 130 | H | -3.71179900 | 5.10950300  | -1.54977600 |
| 87  | Cr          | 0.00195900  | -0.01068800 | 1.86510800  | 131 | H | -3.44291000 | 0.88077900  | -2.23414600 |
| 88  | C           | 0.01269900  | -0.07000700 | -2.76683400 | 132 | H | -4.40879600 | 3.08525400  | -2.82343900 |
| 89  | C           | 2.20378000  | -1.64536300 | -0.66302800 | 133 | H | -0.93802600 | -2.37396700 | -1.80464300 |
| 90  | C           | 2.45876200  | 1.29585800  | -0.78081600 | 134 | H | -2.37365400 | -4.28502600 | -2.42983000 |
| 91  | C           | -2.19060300 | 1.64302200  | -0.66183500 | 135 | H | -4.76947100 | -4.30252800 | -1.74007000 |
| 92  | C           | -2.49393000 | -1.28509700 | -0.79281100 | 136 | H | -5.69768600 | -2.44225700 | -0.42573300 |
| 93  | C           | 1.83942700  | -2.80702500 | 0.05389300  | 137 | H | 0.41098400  | 0.85502800  | -3.19466000 |
| 94  | C           | 2.40932900  | -4.04234900 | -0.27170700 | 138 | H | 0.62717500  | -0.90800000 | -3.11461300 |
| 95  | C           | 3.33402800  | -4.12470800 | -1.31530500 | 139 | H | -1.00389300 | -0.21439900 | -3.13874600 |
| 96  | C           | 3.13406800  | -1.75869100 | -1.70406100 | 140 | H | 0.00610500  | -4.52791800 | 1.09666800  |
| 97  | C           | 3.69898500  | -2.98956900 | -2.03753800 | 141 | H | 1.30874100  | -4.27682100 | 2.30427600  |
| 98  | O           | 0.91300600  | -2.64634100 | 1.05602900  | 142 | H | -0.26038400 | -3.44767500 | 2.49205300  |
| 99  | C           | 1.90696100  | 2.39724000  | -1.45201700 | 143 | H | 5.89607500  | 1.10670400  | 1.37865000  |
| 100 | C           | 2.68253900  | 3.50645700  | -1.79024900 | 144 | H | 5.79377700  | -0.67168800 | 1.24458300  |
| 101 | C           | 4.03247600  | 3.52767200  | -1.44337900 | 145 | H | 6.31867200  | 0.29376600  | -0.16200100 |
| 102 | C           | 3.81976400  | 1.35436000  | -0.39707200 | 146 | H | 0.33141700  | 3.41546300  | 2.46498600  |
| 103 | C           | 4.60257000  | 2.46204700  | -0.74554700 | 147 | H | 0.07646300  | 4.48915400  | 1.06254200  |
| 104 | O           | 4.28579600  | 0.29558300  | 0.32118000  | 148 | H | -1.22115400 | 4.27599200  | 2.28325000  |
| 105 | C           | -1.80267400 | 2.80032700  | 0.04959100  | 149 | H | -5.87298500 | -1.08226900 | 1.45676400  |
| 106 | C           | -2.35546100 | 4.04401000  | -0.27388400 | 150 | H | -5.73918400 | 0.69646100  | 1.36012500  |
| 107 | C           | -3.29009000 | 4.13826900  | -1.30750500 | 151 | H | -6.31660600 | -0.22624000 | -0.05448900 |
| 108 | C           | -3.13213500 | 1.76838400  | -1.69084200 | 152 | C | 2.00138300  | 0.62089300  | 2.67862300  |

|     |             |             |             |             |     |   |             |             |             |
|-----|-------------|-------------|-------------|-------------|-----|---|-------------|-------------|-------------|
| 153 | H           | 2.73591900  | -0.13124400 | 2.40829600  | 197 | C | -4.66588500 | -2.35652600 | -0.60290400 |
| 154 | H           | 2.15003600  | 1.59897400  | 2.22586000  | 198 | O | -4.18557500 | -0.24241500 | 0.50958300  |
| 155 | C           | 1.22087400  | 0.47538100  | 3.80858800  | 199 | C | 0.07594400  | -3.79755000 | 1.51333700  |
| 156 | H           | 1.33929100  | -0.38701200 | 4.45578400  | 200 | C | 5.56231900  | 0.14128300  | 0.94498100  |
| 157 | H           | 0.74429800  | 1.33763800  | 4.26588200  | 201 | C | -0.09346500 | 3.84237300  | 1.42952800  |
| 158 | C           | -1.20120400 | -0.50796900 | 3.81628000  | 202 | C | -5.50455900 | -0.20576000 | 1.05034000  |
| 159 | H           | -0.72084800 | -1.37141000 | 4.26728800  | 203 | H | 1.83663700  | -5.00011500 | 0.17027400  |
| 160 | H           | -1.31530500 | 0.35229200  | 4.46713200  | 204 | H | 3.59083500  | -5.20915900 | -1.53615300 |
| 161 | C           | -1.98840500 | -0.64930600 | 2.69066200  | 205 | H | 3.52779200  | -0.96284400 | -2.16696000 |
| 162 | H           | -2.72385900 | 0.10392600  | 2.42672400  | 206 | H | 4.44696000  | -3.19674400 | -2.72749600 |
| 163 | H           | -2.13896100 | -1.62559200 | 2.23444400  | 207 | H | 1.00810200  | 2.35475000  | -1.84015400 |
| 164 |             |             |             |             | 208 | H | 2.49488900  | 4.24676900  | -2.40682800 |
| 165 | <b>1TS1</b> |             |             |             | 209 | H | 4.86384800  | 4.22525800  | -1.63110800 |
| 166 | N           | 0.00571300  | -0.00248800 | -1.34559900 | 210 | H | 5.71684900  | 2.34644300  | -0.29147700 |
| 167 | P           | 1.36538100  | -0.09864100 | -0.28717000 | 211 | H | -1.87464600 | 5.00729300  | 0.08022600  |
| 168 | P           | -1.36294200 | 0.10292500  | -0.29948500 | 212 | H | -3.65907200 | 5.16992900  | -1.59990100 |
| 169 | Cr          | 0.00266000  | 0.02236600  | 1.81637500  | 213 | H | -3.56787800 | 0.91416500  | -2.15602000 |
| 170 | C           | 0.02539700  | -0.06681500 | -2.81517400 | 214 | H | -4.51827700 | 3.12854500  | -2.73830300 |
| 171 | C           | 2.15065000  | -1.69946700 | -0.69006400 | 215 | H | -1.03234400 | -2.31090400 | -1.94540800 |
| 172 | C           | 2.51688600  | 1.23260100  | -0.79411600 | 216 | H | -2.51907100 | -4.20359800 | -2.50017900 |
| 173 | C           | -2.16828300 | 1.68955100  | -0.72047200 | 217 | H | -4.85705500 | -4.22775700 | -1.63653600 |
| 174 | C           | -2.50698500 | -1.23578900 | -0.80437100 | 218 | H | -5.68033000 | -2.38919100 | -0.22363600 |
| 175 | C           | 1.66873700  | -2.85113800 | -0.02766800 | 219 | H | 0.51432500  | -0.98709300 | -3.15467200 |
| 176 | C           | 2.19330200  | -4.11061200 | -0.33483300 | 220 | H | -0.99925700 | -0.05918700 | -3.19337000 |
| 177 | C           | 3.19149600  | -4.22576800 | -1.30526000 | 221 | H | 0.55795800  | 0.78584500  | -3.24616800 |
| 178 | C           | 3.15164200  | -1.84544000 | -1.65813000 | 222 | H | -0.37282100 | -4.45153700 | 0.75791700  |
| 179 | C           | 3.67331800  | -3.10036600 | -1.97228300 | 223 | H | 0.80528700  | -4.35818600 | 2.10858900  |
| 180 | O           | 0.67804300  | -2.65325000 | 0.90340900  | 224 | H | -0.70554900 | -3.40768000 | 2.16614200  |
| 181 | C           | 2.04458400  | 2.33455200  | -1.52124500 | 225 | H | 5.77526400  | 0.98812400  | 1.60791900  |
| 182 | C           | 2.87744000  | 3.41099900  | -1.82933800 | 226 | H | 5.62622000  | -0.78923700 | 1.50973300  |
| 183 | C           | 4.20157400  | 3.39776200  | -1.39360500 | 227 | H | 6.29019600  | 0.12173000  | 0.12554300  |
| 184 | C           | 3.84997700  | 1.25685400  | -0.32066500 | 228 | H | 0.69702800  | 3.47071600  | 2.08208700  |
| 185 | C           | 4.69015100  | 2.33107400  | -0.63739800 | 229 | H | 0.34253700  | 4.49354600  | 0.66425200  |
| 186 | O           | 4.22722500  | 0.19870300  | 0.44723900  | 230 | H | -0.82686600 | 4.40033800  | 2.02232100  |
| 187 | C           | -1.68919100 | 2.85685900  | -0.08381000 | 231 | H | -5.68986500 | -1.06723700 | 1.70263400  |
| 188 | C           | -2.23078600 | 4.10580600  | -0.40358700 | 232 | H | -5.55771900 | 0.71280700  | 1.63536600  |
| 189 | C           | -3.24627200 | 4.19456500  | -1.35886800 | 233 | H | -6.25799400 | -0.17608500 | 0.25468500  |
| 190 | C           | -3.18945700 | 1.80892000  | -1.67055000 | 234 | C | 1.78779500  | 0.32577100  | 2.80385200  |
| 191 | C           | -3.72936600 | 3.05296200  | -1.99663000 | 235 | H | 2.54205500  | -0.39483900 | 2.49540600  |
| 192 | O           | -0.68384000 | 2.68326200  | 0.83661600  | 236 | H | 2.12753800  | 1.35968600  | 2.71236300  |
| 193 | C           | -2.05324200 | -2.31135500 | -1.58054500 | 237 | C | 0.97992100  | -0.01181700 | 3.96904900  |
| 194 | C           | -2.88748000 | -3.38780100 | -1.88613500 | 238 | H | 1.11095000  | -1.03696200 | 4.31455900  |
| 195 | C           | -4.19434900 | -3.39979600 | -1.40184200 | 239 | H | 1.02117600  | 0.68834900  | 4.80100200  |
| 196 | C           | -3.82450700 | -1.28275700 | -0.28967300 | 240 | C | -0.95929200 | 0.09498800  | 3.97643700  |

|     |              |             |             |             |     |   |             |             |             |
|-----|--------------|-------------|-------------|-------------|-----|---|-------------|-------------|-------------|
| 241 | H            | -0.99552100 | -0.59717000 | 4.81534100  | 285 | C | 4.94853400  | -0.61193200 | 1.85287000  |
| 242 | H            | -1.08381400 | 1.12388700  | 4.31279700  | 286 | C | 3.89731200  | -0.24523600 | -3.66330200 |
| 243 | C            | -1.77694000 | -0.25126600 | 2.82112800  | 287 | C | -0.98112200 | 3.64358700  | 1.84375600  |
| 244 | H            | -2.52262800 | 0.47402100  | 2.50343200  | 288 | C | -5.35482200 | -0.99278100 | 1.68312000  |
| 245 | H            | -2.12942000 | -1.28207000 | 2.74610900  | 289 | H | 1.71319300  | 1.83917100  | 3.12336400  |
| 246 |              |             |             |             | 290 | H | 2.32918800  | -0.52843400 | 3.60131200  |
| 247 | <b>1INT1</b> |             |             |             | 291 | H | 1.84911500  | 0.15693100  | 5.15561700  |
| 248 | N            | -0.20660100 | -0.19737800 | -1.17795500 | 292 | H | -1.15850600 | -1.88821600 | 2.78273600  |
| 249 | P            | 1.16681300  | -0.03241600 | -0.12867000 | 293 | H | -0.45395700 | -0.76054500 | 4.86046100  |
| 250 | P            | -1.65069100 | -0.16235600 | -0.21552800 | 294 | H | 0.70087100  | -2.07937200 | 4.72360500  |
| 251 | Cr           | -0.26140400 | 0.39473000  | 1.88846800  | 295 | H | 0.18230700  | 1.63218800  | 4.01520800  |
| 252 | C            | 0.93785100  | 1.10927500  | 3.39042700  | 296 | H | 0.53281700  | -2.05365400 | 2.23745700  |
| 253 | C            | 1.47855500  | -0.10602300 | 4.15327300  | 297 | H | 4.94763400  | -3.02352700 | 1.01860100  |
| 254 | C            | -0.15983300 | -1.42954600 | 2.81543200  | 298 | H | 4.03472000  | -4.96504000 | -0.19019800 |
| 255 | C            | 0.35918200  | -1.15566000 | 4.23246400  | 299 | H | 0.62592800  | -2.64466200 | -1.39254600 |
| 256 | C            | -0.16373700 | 0.10221600  | -2.62317100 | 300 | H | 1.86591600  | -4.79440900 | -1.40081100 |
| 257 | C            | 2.08869600  | -1.60404300 | -0.21531900 | 301 | H | 1.61039500  | 2.62197300  | 0.80414500  |
| 258 | C            | 2.21575600  | 1.31062400  | -0.78529500 | 302 | H | 2.99173300  | 4.53639000  | 0.05317700  |
| 259 | C            | -2.51827800 | 1.38866800  | -0.66243300 | 303 | H | 4.42969400  | 4.28569400  | -1.96686600 |
| 260 | C            | -2.72142000 | -1.51267600 | -0.81282800 | 304 | H | 4.47079900  | 2.16991400  | -3.21357900 |
| 261 | C            | 3.30828400  | -1.71783600 | 0.48726100  | 305 | H | -2.64768800 | 4.66477200  | 0.33196600  |
| 262 | C            | 4.00838500  | -2.92833600 | 0.48656700  | 306 | H | -4.27344500 | 4.75743100  | -1.49525300 |
| 263 | C            | 3.48613600  | -4.02759700 | -0.19926400 | 307 | H | -3.70848400 | 0.56940800  | -2.25127300 |
| 264 | C            | 1.57777500  | -2.72334200 | -0.87867000 | 308 | H | -4.82380600 | 2.71342400  | -2.80977400 |
| 265 | C            | 2.27230700  | -3.93391100 | -0.87872200 | 309 | H | -1.43915700 | -2.26240600 | -2.37266600 |
| 266 | O            | 3.71411800  | -0.59265600 | 1.13894500  | 310 | H | -2.92448400 | -4.14155800 | -2.98023900 |
| 267 | C            | 2.21740100  | 2.52869300  | -0.09035100 | 311 | H | -5.05639500 | -4.47933700 | -1.74106200 |
| 268 | C            | 3.00151500  | 3.60456300  | -0.50333400 | 312 | H | -5.69288300 | -2.95967600 | 0.08914900  |
| 269 | C            | 3.80877100  | 3.46023200  | -1.63066900 | 313 | H | 0.54724200  | -0.55803000 | -3.12492200 |
| 270 | C            | 3.04495200  | 1.17952400  | -1.92657500 | 314 | H | -1.15590700 | -0.04948500 | -3.05246400 |
| 271 | C            | 3.83607200  | 2.25890000  | -2.34009200 | 315 | H | 0.13269900  | 1.14120400  | -2.80401400 |
| 272 | O            | 3.00990800  | -0.01545100 | -2.56990300 | 316 | H | 4.92390200  | -1.34551800 | 2.66697100  |
| 273 | C            | -2.22862500 | 2.55373500  | 0.07771200  | 317 | H | 5.78773600  | -0.83125500 | 1.18240200  |
| 274 | C            | -2.85855000 | 3.76204700  | -0.22675000 | 318 | H | 5.06486500  | 0.38945300  | 2.26811300  |
| 275 | C            | -3.78809600 | 3.81260100  | -1.26937600 | 319 | H | 4.94206700  | -0.11708000 | -3.35822900 |
| 276 | C            | -3.46206600 | 1.46872500  | -1.69434100 | 320 | H | 3.73004200  | -1.28030900 | -3.96280000 |
| 277 | C            | -4.09663200 | 2.67103200  | -2.00512200 | 321 | H | 3.67422400  | 0.42170300  | -4.50456900 |
| 278 | O            | -1.30293000 | 2.44019300  | 1.11704200  | 322 | H | -0.24032500 | 3.35677400  | 2.58767900  |
| 279 | C            | -2.37215400 | -2.39979000 | -1.83774500 | 323 | H | -0.56094300 | 4.39439500  | 1.16805900  |
| 280 | C            | -3.20681400 | -3.46553100 | -2.17949900 | 324 | H | -1.87147300 | 4.03855100  | 2.34206100  |
| 281 | C            | -4.40004900 | -3.65312600 | -1.48396600 | 325 | H | -5.35539300 | -1.95846300 | 2.20179300  |
| 282 | C            | -3.92770700 | -1.72662100 | -0.10678700 | 326 | H | -5.33127400 | -0.18477300 | 2.41505000  |
| 283 | C            | -4.76588200 | -2.79241300 | -0.44627000 | 327 | H | -6.25757700 | -0.90177300 | 1.06826800  |
| 284 | O            | -4.17703500 | -0.83462400 | 0.89285300  | 328 |   |             |             |             |

329 **IINT2**

330 N -0.15576400 0.42423300 -1.26426900  
331 P 1.31393700 0.03636500 -0.45888200  
332 P -1.50520800 0.33169400 -0.16771500  
333 Cr 0.42834500 -0.46706600 1.80055800  
334 C 0.94009800 1.34205700 2.63371600  
335 C 2.40452100 1.26619100 3.07591400  
336 C 2.15854100 -1.18146300 2.70312600  
337 C 2.66187700 -0.11910500 3.68673100  
338 C -1.62337100 -0.88607600 3.30857800  
339 C -0.62569200 -1.45200900 4.01161500  
340 C -0.24940800 0.57944600 -2.72864700  
341 C 1.85740000 -1.53564000 -1.21292400  
342 C 2.50607900 1.34825400 -0.89137000  
343 C -2.57023100 1.74492200 -0.67938400  
344 C -2.49737400 -1.13483700 -0.69944400  
345 C 1.32535300 -2.71780900 -0.65687600  
346 C 1.66362800 -3.96429100 -1.18809100  
347 C 2.52855300 -4.03250200 -2.28397900  
348 C 2.71846700 -1.63321400 -2.31162000  
349 C 3.05518700 -2.87412100 -2.85271400  
350 O 0.45776700 -2.56707700 0.41427300  
351 C 2.04330400 2.60026600 -1.32164200  
352 C 2.92979200 3.64622100 -1.57674600  
353 C 4.29650600 3.44821100 -1.38406400  
354 C 3.88952000 1.17962700 -0.64907600  
355 C 4.78048900 2.22578800 -0.91574200  
356 O 4.26037400 -0.02628700 -0.14136600  
357 C -2.25706200 3.05064300 -0.23219900  
358 C -3.06316100 4.13470100 -0.60070200  
359 C -4.17428900 3.93092800 -1.42008400  
360 C -3.69123200 1.57554700 -1.50481000  
361 C -4.49196400 2.65447900 -1.87951600  
362 O -1.14465500 3.17420000 0.54522100  
363 C -2.08380400 -2.03125500 -1.69127800  
364 C -2.83270100 -3.17073700 -2.00074000  
365 C -4.01415600 -3.42619500 -1.30728500  
366 C -3.68677000 -1.42622800 0.00853900  
367 C -4.44540600 -2.55975500 -0.29913100  
368 O -4.01053000 -0.53373200 0.99175200  
369 C -0.20345300 -3.74151300 0.90607900  
370 C 5.63754600 -0.26902500 0.14252700  
371 C -0.83105400 4.45349000 1.09385300  
372 C -5.28280100 -0.63590600 1.62984800

373 H 0.72802300 2.15017600 1.92762400  
374 H 3.05756300 1.39602300 2.20241300  
375 H 2.66604200 2.07135300 3.78007900  
376 H 2.01354600 -2.17096200 3.15864400  
377 H 2.11965500 -0.19483200 4.64095700  
378 H 3.72523300 -0.25652200 3.93618400  
379 H 0.26320100 1.45010200 3.49643700  
380 H -2.27472200 -1.46203800 2.65744100  
381 H -1.86491900 0.16887100 3.40862400  
382 H -0.41765300 -2.51730500 3.95750300  
383 H 2.85678600 -1.29854900 1.86280300  
384 H -0.01712100 -0.87851000 4.70335700  
385 H 1.27068100 -4.88048000 -0.76512000  
386 H 2.78755100 -5.00607400 -2.68966100  
387 H 3.13252000 -0.72546800 -2.74018300  
388 H 3.72347700 -2.93475200 -3.70581900  
389 H 0.97629600 2.75811100 -1.43655000  
390 H 2.55525600 4.60497000 -1.92106400  
391 H 4.99828800 4.25274300 -1.58389000  
392 H 5.84342900 2.09871800 -0.74883500  
393 H -2.83133700 5.13564300 -0.25751300  
394 H -4.78933000 4.78192000 -1.69860800  
395 H -3.94322300 0.58164400 -1.85953100  
396 H -5.35238100 2.49659700 -2.52219200  
397 H -1.16354000 -1.84297900 -2.23106100  
398 H -2.49890700 -3.84228500 -2.78592800  
399 H -4.61041600 -4.30253200 -1.54452400  
400 H -5.36387000 -2.77266000 0.23558000  
401 H 0.39165200 1.39579000 -3.07254000  
402 H 0.05190500 -0.33569200 -3.25084200  
403 H -1.27976400 0.81829500 -2.99997100  
404 H -0.76942700 -4.22455700 0.10457800  
405 H 0.51756700 -4.43866200 1.34473000  
406 H -0.89481600 -3.39689200 1.67426800  
407 H 6.01621600 0.43518800 0.89212100  
408 H 5.68093100 -1.28354000 0.53927800  
409 H 6.24616400 -0.20460300 -0.76690600  
410 H 0.05521000 4.30218700 1.71012700  
411 H -0.60847400 5.18100200 0.30431700  
412 H -1.65107700 4.82772600 1.71762100  
413 H -5.36561100 -1.56165600 2.21208500  
414 H -5.34780100 0.22188600 2.29999500  
415 H -6.09493800 -0.58969700 0.89562000  
416

417 **1TS2**

418 N -0.12169300 0.46633500 -1.29243200  
419 P 1.32970500 0.04227200 -0.45808800  
420 P -1.46924900 0.37479100 -0.20697700  
421 Cr 0.11556400 -0.55628800 1.74835600  
422 C 0.62463500 1.15925400 2.75312000  
423 C 2.06088100 1.00847900 3.24597900  
424 C 1.66463500 -1.47682300 3.10358000  
425 C 2.23106400 -0.34277600 3.95259500  
426 C -1.46141700 -1.28671600 2.96120100  
427 C -0.40428500 -1.86033600 3.69330100  
428 C -0.20807600 0.66492000 -2.75106700  
429 C 1.91284500 -1.46561600 -1.31636900  
430 C 2.54626500 1.36273900 -0.80084900  
431 C -2.48580800 1.85069800 -0.62318800  
432 C -2.51369100 -1.03845900 -0.76655900  
433 C 1.37827800 -2.69858600 -0.88508900  
434 C 1.75453900 -3.88984600 -1.51162500  
435 C 2.66386900 -3.85435300 -2.57226600  
436 C 2.82129300 -1.46094400 -2.38115700  
437 C 3.19931200 -2.64573400 -3.01317800  
438 O 0.47730700 -2.65617900 0.16638400  
439 C 2.15513200 2.61718800 -1.28666400  
440 C 3.08500300 3.64420800 -1.45651400  
441 C 4.42023200 3.42412500 -1.12169100  
442 C 3.89329100 1.17396000 -0.41540200  
443 C 4.82956000 2.19753100 -0.59425800  
444 O 4.17770000 -0.03739500 0.14214900  
445 C -2.06055900 3.13730500 -0.21393900  
446 C -2.83180000 4.26492800 -0.51976400  
447 C -4.01753100 4.12446800 -1.24205100  
448 C -3.67751400 1.74551200 -1.35481800  
449 C -4.44304500 2.86829000 -1.66833500  
450 O -0.87743700 3.20012500 0.45890600  
451 C -2.14214000 -1.90902500 -1.79724600  
452 C -2.92207700 -3.02239500 -2.12287100  
453 C -4.08822000 -3.27845000 -1.40354700  
454 C -3.69230800 -1.32452900 -0.03744100  
455 C -4.47732400 -2.43717900 -0.35793300  
456 O -3.97811100 -0.44735300 0.96552700  
457 C -0.17356200 -3.88106400 0.53058800  
458 C 5.52081200 -0.32442800 0.52753700  
459 C -0.42922100 4.46504700 0.94360300  
460 C -5.18282200 -0.60990900 1.71146000

461 H 0.47504300 1.99749800 2.06874600  
462 H 2.75224400 1.05416000 2.39383600  
463 H 2.34797700 1.82988500 3.92040400  
464 H 1.82805700 -2.45716600 3.55165700  
465 H 1.72111900 -0.31741300 4.92630700  
466 H 3.29092100 -0.53704900 4.17601700  
467 H -0.08993800 1.24513600 3.58385900  
468 H -2.07242900 -1.91884900 2.31977200  
469 H -1.94713200 -0.38478300 3.32451600  
470 H -0.24357600 -2.93101100 3.61489900  
471 H 2.15402300 -1.51821800 2.11444400  
472 H -0.11766000 -1.43455300 4.64907000  
473 H 1.35627500 -4.84353900 -1.18837900  
474 H 2.95063100 -4.78610900 -3.05101500  
475 H 3.23892500 -0.51486700 -2.71286000  
476 H 3.90343200 -2.62383900 -3.83897200  
477 H 1.10985400 2.79508600 -1.51247700  
478 H 2.76762900 4.60563400 -1.84802900  
479 H 5.15415100 4.21354100 -1.25534000  
480 H 5.86671300 2.05224700 -0.31612600  
481 H -2.51530300 5.25117700 -0.20281300  
482 H -4.60462200 5.00892300 -1.47235700  
483 H -4.01184700 0.76896500 -1.68746500  
484 H -5.36025000 2.75923400 -2.23839100  
485 H -1.23029600 -1.72250800 -2.35182800  
486 H -2.62351200 -3.67455900 -2.93800000  
487 H -4.70639600 -4.13668100 -1.65086500  
488 H -5.38531500 -2.65059200 0.19397100  
489 H 0.08427900 -0.23973700 -3.29593000  
490 H -1.23451200 0.92394600 -3.02038400  
491 H 0.44469500 1.48073400 -3.07288400  
492 H -0.71824100 -4.29500200 -0.32292000  
493 H 0.55050000 -4.60890300 0.91163900  
494 H -0.88260800 -3.62335000 1.31578800  
495 H 5.86560200 0.36555400 1.30651500  
496 H 5.50446500 -1.34122300 0.92109300  
497 H 6.19750100 -0.27697900 -0.33344700  
498 H 0.51124900 4.26866600 1.45865100  
499 H -0.25400800 5.16633700 0.11935700  
500 H -1.15000300 4.89654700 1.64755900  
501 H -5.18542100 -1.55893000 2.26081600  
502 H -5.20687600 0.22021700 2.41790300  
503 H -6.06099500 -0.55948800 1.05754600  
504

505 **1INT3**

506 N 0.13589700 0.70118800 -1.44698100  
507 P 1.47098500 0.45114600 -0.36544000  
508 P -1.33667000 0.33300700 -0.59620700  
509 Cr -0.18246600 -0.62443900 1.39451800  
510 C -0.43718200 0.91683800 2.65215000  
511 C 0.44228200 0.19204500 3.66382200  
512 C -0.26468900 -0.37632600 4.90911500  
513 C -1.59030200 -1.89522100 2.17696700  
514 C -2.10506200 -1.71520600 3.61066300  
515 C 0.22352700 0.69355300 -2.91865900  
516 C 2.43403000 -0.97403200 -1.01180600  
517 C 2.58308800 1.88653700 -0.59061100  
518 C -2.22646000 1.91932000 -0.40075800  
519 C -2.36137000 -0.64195200 -1.75081000  
520 C 2.37302600 -2.20099100 -0.32040100  
521 C 3.10820400 -3.30369200 -0.76421600  
522 C 3.90577200 -3.19049700 -1.90550300  
523 C 3.25568100 -0.88752400 -2.14385400  
524 C 3.98462800 -1.98515900 -2.60025700  
525 O 1.56513500 -2.26797600 0.81160500  
526 C 2.27437200 2.99718800 -1.38436900  
527 C 3.13596400 4.09354700 -1.45838200  
528 C 4.31813100 4.08730600 -0.72114100  
529 C 3.77372600 1.90966400 0.17208200  
530 C 4.64124200 3.00302800 0.09829300  
531 O 3.97960200 0.81660800 0.96137700  
532 C -3.41720900 1.92714500 0.36008700  
533 C -4.09899100 3.12627700 0.58891000  
534 C -3.59111700 4.31860000 0.06642100  
535 C -1.73548900 3.12770500 -0.90361600  
536 C -2.41271000 4.32760100 -0.67804600  
537 O -3.81844100 0.70982600 0.81920600  
538 C -3.43724700 -0.07636800 -2.44885100  
539 C -4.22613500 -0.84450800 -3.30392500  
540 C -3.94163400 -2.20000400 -3.46129500  
541 C -2.08132900 -2.01502100 -1.92822900  
542 C -2.87587000 -2.79057900 -2.77964400  
543 O -1.00717800 -2.50350800 -1.24040600  
544 C 1.80445800 -3.34956600 1.72930000  
545 C 5.16533500 0.75047600 1.74982500  
546 C -5.02293300 0.61744900 1.57725700  
547 C -0.73296800 -3.90026300 -1.32800400  
548 H -0.01102400 1.85076700 2.27814400

549 H 0.97282900 -0.68617400 3.17489800  
550 H 1.29207800 0.82308700 3.95071900  
551 H 0.48392600 -0.53032600 5.69695500  
552 H -1.47414100 1.05395200 2.96084500  
553 H -1.12000900 -2.89060600 2.07000000  
554 H -2.42927900 -1.86940500 1.46867800  
555 H -2.80124300 -2.53662100 3.84245000  
556 H 3.07293400 -4.24903300 -0.23628100  
557 H 4.47151600 -4.05446200 -2.24172900  
558 H 3.34185900 0.06418700 -2.66011700  
559 H 4.61362400 -1.89635500 -3.48040500  
560 H 1.34978100 3.00956200 -1.94967100  
561 H 2.88257400 4.94200500 -2.08604400  
562 H 4.99714500 4.93345700 -0.77109100  
563 H 5.55824100 3.02180800 0.67524800  
564 H -5.01502700 3.14047200 1.16767800  
565 H -4.12635400 5.24567200 0.25033100  
566 H -0.80984600 3.12714600 -1.46812100  
567 H -2.02143600 5.25751500 -1.07826100  
568 H -3.65935000 0.97745000 -2.31661900  
569 H -5.05398200 -0.38879600 -3.83764700  
570 H -4.55029700 -2.81252500 -4.12024600  
571 H -2.67364500 -3.84528200 -2.92035700  
572 H 1.13980200 1.19591900 -3.23704800  
573 H 0.22864500 -0.32698900 -3.31795100  
574 H -0.62752200 1.23119400 -3.34557900  
575 H 1.21867200 -3.12707100 2.62020400  
576 H 1.47001100 -4.30445500 1.31162800  
577 H 2.86745600 -3.40346000 1.98275000  
578 H 5.20583700 1.57147800 2.47538800  
579 H 5.11720100 -0.20142000 2.28003700  
580 H 6.06155000 0.77137200 1.11892100  
581 H -5.13439100 -0.43784400 1.82717600  
582 H -4.95729700 1.20794800 2.49868400  
583 H -5.88594000 0.94841800 0.98779400  
584 H 0.13640800 -4.07025600 -0.69550400  
585 H -1.57925100 -4.49206200 -0.96096900  
586 H -0.49345600 -4.19260200 -2.35678000  
587 C -1.02393600 -1.69931200 4.70899900  
588 H -1.48657200 -1.95873000 5.66962000  
589 H -0.29815300 -2.50384800 4.50596000  
590 H -0.95463200 0.38927500 5.28704300  
591 H -2.70397200 -0.79640400 3.68107400  
592

593 **1TS3**

594 N -0.01735700 0.33394300 -1.55763700  
595 P 1.29266100 0.39556500 -0.43515100  
596 P -1.41628000 -0.12425800 -0.64540000  
597 Cr -0.09175700 -0.36058400 1.52898000  
598 C -0.66279100 -2.42764200 4.68026200  
599 C 1.58233600 0.01814900 2.75180400  
600 C 0.55586700 -0.39138800 3.68119200  
601 C 0.68367900 -1.72442800 4.43387200  
602 C -1.37922500 -2.80628700 3.37006700  
603 C -1.76922100 -1.60378800 2.49141500  
604 C 0.03943900 0.81259600 -2.94504600  
605 C 2.60173800 -0.67886300 -1.14967500  
606 C 1.95318900 2.09991600 -0.55326400  
607 C -2.04231300 -1.68866500 -1.37054700  
608 C -2.73337000 1.11230700 -0.97507900  
609 C 3.87084700 -0.75027100 -0.52910900  
610 C 4.85601300 -1.60944900 -1.02970600  
611 C 4.57793700 -2.41373100 -2.13683200  
612 C 2.34516000 -1.51429100 -2.24432300  
613 C 3.32410000 -2.37523600 -2.74449100  
614 O 4.04210300 0.05493200 0.55531900  
615 C 3.05903800 2.43841000 -1.34271000  
616 C 3.51508800 3.75412300 -1.42349700  
617 C 2.86001000 4.74913000 -0.70011000  
618 C 1.29506900 3.12313500 0.16528400  
619 C 1.75322300 4.44281900 0.09451200  
620 O 0.20791500 2.73897600 0.90308800  
621 C -3.25360800 -1.81653400 -2.06455300  
622 C -3.69108400 -3.05285400 -2.54175400  
623 C -2.91460900 -4.18714600 -2.31701900  
624 C -1.28108500 -2.86041700 -1.12903100  
625 C -1.71404900 -4.09974600 -1.60823600  
626 O -0.13038600 -2.69439300 -0.40410200  
627 C -3.42140500 1.71078500 0.10797100  
628 C -4.41578300 2.66829700 -0.13112500  
629 C -4.73409000 3.03764400 -1.43772200  
630 C -3.08942500 1.49884500 -2.27879000  
631 C -4.07514000 2.45524600 -2.51865400  
632 O -3.07123400 1.30747900 1.36583700  
633 C 5.31749000 0.10336500 1.19155000  
634 C -0.51028100 3.73502300 1.62848900  
635 C 0.68629700 -3.83665200 -0.13887300  
636 C -3.89324400 1.70485000 2.46286900

637 H -1.31464600 -1.77633100 5.28171100  
638 H 2.40374200 -0.66674800 2.54749100  
639 H 1.85983000 1.06825900 2.69592500  
640 H 0.12749800 0.41153000 4.29130800  
641 H -0.62152900 -0.76026300 3.05490900  
642 H 1.33777500 -2.39365800 3.85671700  
643 H 1.19556200 -1.53763100 5.38666100  
644 H -0.49321500 -3.33032300 5.27873800  
645 H -2.14978400 -1.94321700 1.52551400  
646 H -2.55625200 -1.00416500 2.96238400  
647 H -2.27877300 -3.39298200 3.60475500  
648 H -0.72349200 -3.47906600 2.79672500  
649 H 5.83311300 -1.65820100 -0.56374300  
650 H 5.35044100 -3.07552900 -2.51776000  
651 H 1.36318200 -1.49756900 -2.70336400  
652 H 3.10805300 -3.00402300 -3.60270600  
653 H 3.57055800 1.65988500 -1.89999800  
654 H 4.37221300 3.99705300 -2.04360100  
655 H 3.20571200 5.77770200 -0.74961200  
656 H 1.25853900 5.23306600 0.64621700  
657 H -3.86869400 -0.93876700 -2.22702900  
658 H -4.63026300 -3.12550600 -3.08087100  
659 H -3.24211100 -5.15562600 -2.68384800  
660 H -1.13266200 -4.99667800 -1.43209800  
661 H -4.94708900 3.12733800 0.69380200  
662 H -5.50795800 3.78133400 -1.60448000  
663 H -2.60264200 1.02996000 -3.12617000  
664 H -4.32924000 2.73242100 -3.53672700  
665 H 1.07874100 0.83181600 -3.28136400  
666 H -0.51508600 0.13500300 -3.60436100  
667 H -0.36858600 1.82449000 -3.04062500  
668 H 6.09468200 0.43547300 0.49352800  
669 H 5.21682700 0.83002400 1.99810000  
670 H 5.59093500 -0.87259700 1.61002500  
671 H -1.33176100 3.20597400 2.10999600  
672 H 0.12381300 4.20798900 2.38757900  
673 H -0.91242600 4.50028600 0.95472400  
674 H 1.53850400 -3.46362800 0.42948100  
675 H 0.14178700 -4.58153100 0.45230000  
676 H 1.04477200 -4.28666000 -1.07054000  
677 H -3.49392100 1.18547800 3.33475800  
678 H -3.84490200 2.78745600 2.63194400  
679 H -4.93524300 1.40549900 2.30382900  
680



681 1SC2

682 N 0.14355700 -0.12693000 -1.59757300  
683 P 1.37901100 0.00664400 -0.37833200  
684 P -1.35626300 -0.10597700 -0.74864200  
685 Cr -0.28040600 0.08481200 1.48608100  
686 C -1.63248200 -0.97023400 4.92617700  
687 C 1.35375200 0.42274200 2.84364700  
688 C 0.14851200 0.36280100 3.57055200  
689 C -0.14753900 -0.75776700 4.55916000  
690 C -2.39548300 -1.98266400 4.05713000  
691 C -2.34455900 -1.70240600 2.55332200  
692 C 0.33500400 0.07401300 -3.03935200  
693 C 2.48734500 -1.42981100 -0.67578600  
694 C 2.37711300 1.46234900 -0.87987600  
695 C -2.44056200 -1.38003800 -1.48865300  
696 C -2.19348200 1.49643600 -1.06629600  
697 C 3.67779400 -1.55692600 0.07724600  
698 C 4.50883200 -2.66907600 -0.09716500  
699 C 4.15211300 -3.66481700 -1.00941200  
700 C 2.14541600 -2.45248400 -1.56831300  
701 C 2.97192400 -3.56496300 -1.74375200  
702 O 3.93277300 -0.54220500 0.94825800  
703 C 3.50370800 1.34372600 -1.70450700  
704 C 4.24060100 2.46156700 -2.09438300  
705 C 3.85036700 3.72341500 -1.65015300  
706 C 1.99215400 2.75042300 -0.44484200  
707 C 2.73247900 3.87463400 -0.82774600  
708 O 0.87687300 2.82103600 0.34591400  
709 C -3.62298800 -1.08860600 -2.18444000  
710 C -4.45122200 -2.10323000 -2.66555800  
711 C -4.10338800 -3.43370800 -2.44315700  
712 C -2.11460300 -2.74033100 -1.25435600  
713 C -2.94342100 -3.75835000 -1.73662700  
714 O -0.97510800 -2.96792900 -0.54164400  
715 C -2.58219500 2.27042900 0.04991200  
716 C -3.20811100 3.50829200 -0.12683100  
717 C -3.43286200 3.99473000 -1.41628200  
718 C -2.42740300 2.01844300 -2.34861600  
719 C -3.03824000 3.25875200 -2.53197800  
720 O -2.30338100 1.75731100 1.30564000  
721 C 5.14194700 -0.56255300 1.70344000  
722 C 0.50432300 4.08924600 0.87892400  
723 C -0.62043700 -4.31211000 -0.21857000  
724 C -2.93973900 2.37011900 2.43656800

725 H -2.15106300 0.00045900 4.89865300  
726 H 2.04908900 -0.41404600 2.86680200  
727 H 1.80032200 1.37733800 2.57556200  
728 H -0.31559500 1.32058500 3.83209800  
729 H -1.33594200 -1.89235100 2.15024900  
730 H 0.28957600 -1.70143800 4.19949200  
731 H 0.39997700 -0.52102800 5.48407600  
732 H -1.69853700 -1.30857800 5.96712800  
733 H -3.01398200 -2.35854500 1.98624100  
734 H -2.64565000 -0.67010400 2.32221200  
735 H -3.44361300 -2.00712000 4.38148600  
736 H -1.99655700 -2.98911100 4.24337500  
737 H 5.42657100 -2.76621000 0.47077500  
738 H 4.80531600 -4.52315300 -1.13790500  
739 H 1.21439900 -2.38074100 -2.11879200  
740 H 2.69623400 -4.34157600 -2.45062300  
741 H 3.81168100 0.35814800 -2.03961500  
742 H 5.10933000 2.34593400 -2.73482500  
743 H 4.41479200 4.60461400 -1.94148600  
744 H 2.44684300 4.86585100 -0.49713600  
745 H -3.90799300 -0.05519000 -2.34381100  
746 H -5.35894500 -1.85282200 -3.20516400  
747 H -4.73886500 -4.23371800 -2.81191800  
748 H -2.69691000 -4.79917200 -1.56473700  
749 H -3.52012700 4.10161300 0.72403300  
750 H -3.91939800 4.95777200 -1.54024400  
751 H -2.13969300 1.43840500 -3.21949400  
752 H -3.21132400 3.63949500 -3.53350800  
753 H 1.29624700 -0.34473500 -3.34822500  
754 H -0.45438200 -0.45042200 -3.58856800  
755 H 0.31997900 1.13629600 -3.31031800  
756 H 6.01870200 -0.55880000 1.04537000  
757 H 5.13117700 0.34874800 2.30188000  
758 H 5.18221900 -1.43519100 2.36621300  
759 H -0.35959400 3.89838500 1.51527500  
760 H 1.31325000 4.51965600 1.48059500  
761 H 0.22204000 4.78807200 0.08320700  
762 H 0.30903300 -4.24410800 0.34659400  
763 H -1.39586200 -4.78895300 0.39236900  
764 H -0.44934700 -4.90519900 -1.12418100  
765 H -2.70139800 1.73788500 3.29090400  
766 H -2.55141900 3.37920300 2.61258600  
767 H -4.02418200 2.40888000 2.29312500  
768

769 1P  
770 N -0.50955500 1.29203500 0.89594900  
771 P -1.67586000 0.42760400 -0.05737100  
772 P 1.10881000 0.84548100 0.40021400  
773 Cr 0.21650300 -1.06048600 -1.20537200  
774 C 1.19673200 -0.74944200 -3.32307500  
775 C 0.72235700 -2.00993300 -3.52445600  
776 C 3.02354000 -3.28576900 -3.30187400  
777 C 1.51174000 -3.29965600 -3.62620700  
778 C 2.87774800 -3.06347300 -0.72096600  
779 C 3.41106200 -3.84736300 -1.92296000  
780 C -0.78694300 1.86123600 2.22724200  
781 C -2.49728900 -0.76647900 1.08598200  
782 C -3.00035000 1.64057300 -0.43109600  
783 C 1.83403600 2.37698400 -0.31585800  
784 C 2.04279700 0.62777100 1.96665100  
785 C -2.20613000 -2.14107500 0.97168200  
786 C -2.81701600 -3.07301800 1.81522900  
787 C -3.72244500 -2.64036400 2.78694000  
788 C -3.42058600 -0.36724900 2.06171200  
789 C -4.02900200 -1.28750200 2.91515100  
790 O -1.29834200 -2.53723900 -0.00979800  
791 C -2.88963900 3.01353800 -0.18192500  
792 C -3.89271400 3.90476400 -0.56985100  
793 C -5.02171500 3.42253300 -1.22744200  
794 C -4.13938800 1.17482900 -1.12901500  
795 C -5.14908800 2.06108800 -1.51423500  
796 O -4.15401300 -0.16396800 -1.39370800  
797 C 3.10742200 2.28751900 -0.92245500  
798 C 3.67475700 3.39997500 -1.55009200  
799 C 2.96979500 4.60654800 -1.58591500  
800 C 1.14816000 3.59345600 -0.37775900  
801 C 1.70777600 4.70926400 -1.00496600  
802 O 3.71005400 1.06201900 -0.84099200  
803 C 2.87516700 1.62574000 2.49096600  
804 C 3.59925900 1.42594100 3.66651300  
805 C 3.49370200 0.20750100 4.33384400  
806 C 1.94905700 -0.60176800 2.65744800  
807 C 2.67359500 -0.80755400 3.83674600  
808 O 1.12003800 -1.54191100 2.10890100  
809 C -1.33463600 -3.91120700 -0.42255300  
810 C -5.27333500 -0.71680100 -2.07844500  
811 C 5.05192500 0.92728700 -1.30063400  
812 C 0.98769600 -2.79298900 2.77491800

813 H 0.56300200 0.11494400 -3.51727200  
814 H 1.77717700 -3.07012200 -0.69303300  
815 H -0.32324700 -2.10613600 -3.82654500  
816 H 3.42875900 -2.27285200 -3.41621200  
817 H 1.37520200 -3.62520600 -4.66871200  
818 H 1.01265000 -4.08384000 -3.03654900  
819 H 2.24532800 -0.54102600 -3.12989000  
820 H 3.21806600 -3.50380800 0.22297500  
821 H 3.20525100 -2.01715200 -0.73515100  
822 H 3.07112800 -4.89044400 -1.85557800  
823 H 3.53462100 -3.88996400 -4.06011400  
824 H 4.50631200 -3.88501200 -1.86361000  
825 H -2.60077700 -4.13136600 1.72923200  
826 H -4.18978300 -3.37322900 3.43822400  
827 H -3.68406600 0.68384600 2.13475600  
828 H -4.74051500 -0.95203000 3.66327500  
829 H -2.00650300 3.39400600 0.31754000  
830 H -3.78869000 4.96438100 -0.35834600  
831 H -5.81040900 4.10427100 -1.53213800  
832 H -6.02688400 1.70435400 -2.04009400  
833 H 4.65352800 3.33796800 -2.01136900  
834 H 3.41715700 5.46604100 -2.07677100  
835 H 0.16153200 3.66274300 0.06654000  
836 H 1.16156000 5.64682500 -1.03760200  
837 H 2.95688000 2.57333200 1.96817600  
838 H 4.23572400 2.21475700 4.05508400  
839 H 4.05070700 0.03546400 5.25046000  
840 H 2.60605800 -1.74617400 4.37344000  
841 H -1.79004400 2.29397700 2.24687800  
842 H -0.72038700 1.10262700 3.01580400  
843 H -0.06927400 2.65541800 2.45056800  
844 H -0.72527000 -3.97267800 -1.32529800  
845 H -0.90965500 -4.56947500 0.34259300  
846 H -2.36049300 -4.21830100 -0.64892700  
847 H -5.38095800 -0.28385400 -3.08031600  
848 H -5.07189700 -1.78550400 -2.16422800  
849 H -6.19970200 -0.56604300 -1.51164800  
850 H 5.34176800 -0.10039200 -1.07717900  
851 H 5.12521100 1.10095800 -2.38134500  
852 H 5.72133800 1.61714600 -0.77371300  
853 H 0.29009300 -3.37494200 2.17366200  
854 H 1.94905300 -3.31735700 2.83310800  
855 H 0.57687100 -2.66566500 3.78327300  
856

857 **1INT4**  
858 N -0.25646700 0.34578900 -1.37987000  
859 P -1.58049300 0.09275000 -0.28447400  
860 P 1.25776500 0.29864500 -0.55239200  
861 Cr 0.24778900 -0.38944400 1.76074900  
862 C 1.89140600 -0.27282300 2.94372200  
863 C 3.08636400 -1.19001800 2.66138400  
864 C 2.97984000 -2.61080500 3.23771000  
865 C -0.10347900 -2.39861600 1.63895300  
866 C 0.51620000 -3.33696100 2.67185400  
867 C 2.02996200 -3.59576800 2.53653600  
868 C -1.12128000 0.75230000 3.63018100  
869 C -1.59859000 -0.50415800 3.67831800  
870 C -0.36359200 0.63696100 -2.82227700  
871 C -2.76714200 1.44811200 -0.67010300  
872 C -2.46716600 -1.40435200 -0.87735200  
873 C 1.79701400 2.05952800 -0.42106900  
874 C 2.43821800 -0.44837600 -1.74614700  
875 C -2.67924600 2.68135600 0.01688100  
876 C -3.56618400 3.72174300 -0.28269400  
877 C -4.54500900 3.54284200 -1.26226800  
878 C -3.76666500 1.29870500 -1.64245700  
879 C -4.65153900 2.33377300 -1.94594500  
880 O -1.69672200 2.78665100 0.96505500  
881 C -2.00666600 -2.20627400 -1.92690900  
882 C -2.68487000 -3.37115600 -2.29599000  
883 C -3.83243500 -3.74798900 -1.60162800  
884 C -3.61278300 -1.82105400 -0.16272900  
885 C -4.29944800 -2.98110200 -0.53078300  
886 O -3.96868900 -1.02153500 0.88981200  
887 C 0.98383000 3.11262300 -0.85750900  
888 C 1.38065900 4.44351900 -0.71151200  
889 C 2.60067300 4.73294200 -0.10258100  
890 C 3.02741000 2.37236400 0.20375500  
891 C 3.42500000 3.70538300 0.36034900  
892 O 3.76568900 1.30442100 0.60919600  
893 C 2.40270600 -1.83709800 -2.01874500  
894 C 3.31784500 -2.40291000 -2.91461000  
895 C 4.26116100 -1.59640200 -3.55183500  
896 C 3.39212900 0.33536400 -2.41195800  
897 C 4.29922700 -0.22490100 -3.30985300  
898 O 1.43479200 -2.55774100 -1.38604900  
899 C -1.52119200 4.03860900 1.62824800  
900 C -5.21087900 -1.26682500 1.54804700

901 C 5.05826400 1.52629300 1.17079800  
902 C 1.34575700 -3.96034600 -1.63731500  
903 H 2.17346300 0.78617200 2.80177300  
904 H 3.28232900 -1.24857400 1.58138000  
905 H 3.98851800 -0.73221400 3.09809000  
906 H 3.98375800 -3.05582000 3.21385400  
907 H -1.20090100 -2.45464200 1.65171000  
908 H 0.24218600 -2.62521300 0.62455000  
909 H 0.29485100 -3.00067400 3.69627500  
910 H 0.00035300 -4.30701500 2.57708400  
911 H 2.23724200 -4.59092000 2.95082600  
912 H 2.29117800 -3.65332000 1.46925200  
913 H 2.70794900 -2.54716400 4.30250900  
914 H 1.56023600 -0.38834500 3.98734900  
915 H -1.20795100 -1.23756900 4.37835600  
916 H -2.41565100 -0.81944200 3.03447200  
917 H -0.33298600 1.08659000 4.29972400  
918 H -1.54795000 1.48678600 2.95101200  
919 H -3.50711600 4.66790400 0.24158600  
920 H -5.22702500 4.35889300 -1.48321200  
921 H -3.85636700 0.35094600 -2.16423900  
922 H -5.41402000 2.19405600 -2.70578300  
923 H -1.10290700 -1.92318500 -2.45308700  
924 H -2.32168800 -3.97266100 -3.12372500  
925 H -4.37157200 -4.64784400 -1.88323600  
926 H -5.18606500 -3.29589000 0.00722200  
927 H 0.02626200 2.88969000 -1.31334500  
928 H 0.74512500 5.24358900 -1.07887700  
929 H 2.92223900 5.76367200 0.01638200  
930 H 4.36954800 3.94720200 0.83314400  
931 H 3.30033200 -3.46608500 -3.12082400  
932 H 4.96435700 -2.05055000 -4.24404800  
933 H 3.42212600 1.40353900 -2.22990800  
934 H 5.02533600 0.40552600 -3.81313200  
935 H 0.26977400 1.48664400 -3.09357000  
936 H -0.05766000 -0.22144400 -3.42919600  
937 H -1.39698100 0.89336700 -3.06680000  
938 H -1.29147600 4.83576700 0.91334900  
939 H -2.40977100 4.30746900 2.21134000  
940 H -0.67025500 3.90447400 2.29721200  
941 H -5.32238300 -0.46696500 2.28121100  
942 H -6.04510400 -1.23078600 0.83832000  
943 H -5.20608700 -2.23579100 2.06138700  
944 H 5.46180900 0.53607100 1.38054900

945 H 5.71048100 2.04814300 0.46107100

946 H 4.99228100 2.09928200 2.10305200

947 H 2.25452600 -4.47893000 -1.31164800

948 H 0.49420600 -4.31079600 -1.05399600

949 H 1.16711400 -4.16000500 -2.70023700

950

951 **1TS4**

952 N -0.24583600 0.16532300 -1.56484600

953 P -1.56050500 0.11768100 -0.45058200

954 P 1.25692400 0.03525900 -0.71143900

955 Cr -0.10112400 0.05672500 1.73979300

956 C 1.53221800 0.52550200 2.90065000

957 C 2.64476900 -0.47573600 3.23474200

958 C 2.32466000 -1.58698000 4.26095100

959 C -0.24635000 -2.06265000 2.32801600

960 C 0.28653500 -3.03063100 3.38422200

961 C 1.78704900 -2.92006000 3.70133900

962 C -1.29143200 -0.74497100 3.63089100

963 C -1.63263700 0.52283800 3.12026600

964 C -0.35098000 0.37567000 -3.02102000

965 C -2.32840200 1.77230800 -0.58481100

966 C -2.78366200 -1.08006700 -1.09398400

967 C 2.12730900 1.64270500 -0.95351100

968 C 2.21643400 -1.16067300 -1.72831600

969 C -1.74877200 2.80666100 0.18185500

970 C -2.26042100 4.10564700 0.11341600

971 C -3.35084000 4.37634600 -0.71804200

972 C -3.42181800 2.07245600 -1.40506400

973 C -3.93651700 3.36700600 -1.47902800

974 O -0.66522700 2.47020700 0.97962000

975 C -2.47670600 -1.98211000 -2.12071400

976 C -3.39736300 -2.94741200 -2.53268000

977 C -4.63906200 -3.02365500 -1.90470600

978 C -4.03050200 -1.20219500 -0.43663000

979 C -4.95941800 -2.16043900 -0.85427900

980 O -4.23146200 -0.34617100 0.60735000

981 C 1.50179500 2.77450000 -1.49060700

982 C 2.16082700 4.00483500 -1.55884400

983 C 3.46190200 4.11493400 -1.07056700

984 C 3.43503300 1.78325900 -0.43293900

985 C 4.10191800 3.01155700 -0.50175400

986 O 3.96239200 0.65707100 0.12388600

987 C 1.90412900 -2.53591300 -1.63147700

988 C 2.60332900 -3.47589300 -2.39617100

989 C 3.61107500 -3.05133100 -3.26471300

990 C 3.22600000 -0.76585400 -2.61468900

991 C 3.92407300 -1.69875200 -3.38217000

992 O 0.89114800 -2.86349600 -0.77349000

993 C -0.02725000 3.53488200 1.70398200

994 C -5.50092500 -0.33674200 1.25823300

995 C 5.29902100 0.68745000 0.61915000

996 C 0.50838700 -4.23198200 -0.65967800

997 H 1.96645400 1.33409700 2.28846000

998 H 3.02137600 -0.93740000 2.31142000

999 H 3.49444100 0.09933300 3.63637200

1000 H 3.25949300 -1.82481200 4.78362400

1001 H -1.15020700 -2.43065100 1.83469600

1002 H 0.52985600 -1.96978800 1.54574500

1003 H -0.29324400 -2.96077900 4.31483100

1004 H 0.10494000 -4.05135600 3.01555100

1005 H 2.01315000 -3.71171500 4.42727800

1006 H 2.36060600 -3.17314300 2.79710000

1007 H 1.65052200 -1.19914400 5.03935100

1008 H 1.15068600 0.98664900 3.82572800

1009 H -0.57143300 -0.79613900 4.43924700

1010 H -2.03364200 -1.53655000 3.63870600

1011 H -1.21717400 1.40904500 3.59498600

1012 H -2.57296700 0.65419900 2.59110400

1013 H -1.82814000 4.91090200 0.69367300

1014 H -3.73925800 5.38966500 -0.76222600

1015 H -3.87762300 1.27671300 -1.98725300

1016 H -4.78340000 3.58300200 -2.12280700

1017 H -1.50459700 -1.93386900 -2.59648800

1018 H -3.14626400 -3.62796300 -3.34025300

1019 H -5.36720300 -3.76490500 -2.22097600

1020 H -5.92269300 -2.24579500 -0.36544000

1021 H 0.48187000 2.70156000 -1.85124600

1022 H 1.66220800 4.86407700 -1.99702400

1023 H 3.98817700 5.06366800 -1.12357400

1024 H 5.10882900 3.11512800 -0.11483800

1025 H 2.37250800 -4.53188100 -2.32305200

1026 H 4.14820700 -3.79017900 -3.85257000

1027 H 3.46606600 0.28799300 -2.70806300

1028 H 4.70194100 -1.36980300 -4.06408200

1029 H 0.30316900 1.18781600 -3.34924700

1030 H -0.06798500 -0.52825800 -3.57061900

1031 H -1.37852700 0.63998300 -3.28224900

1032 H 0.36605000 4.28238400 1.00921400

|      |              |             |             |             |      |   |             |             |             |
|------|--------------|-------------|-------------|-------------|------|---|-------------|-------------|-------------|
| 1033 | H            | -0.72690100 | 3.99651100  | 2.40833300  | 1077 | C | 3.34916300  | -1.97074200 | -4.05597000 |
| 1034 | H            | 0.79468600  | 3.07838500  | 2.25115400  | 1078 | C | 3.29423600  | -0.73725400 | -1.97939100 |
| 1035 | H            | -5.44197300 | 0.44880400  | 2.01236000  | 1079 | C | 3.91517400  | -1.02265600 | -3.19942400 |
| 1036 | H            | -6.30504600 | -0.10383500 | 0.55089900  | 1080 | O | 3.75470500  | 0.16452400  | -1.06905400 |
| 1037 | H            | -5.70579900 | -1.29751400 | 1.74531800  | 1081 | C | 2.09680700  | -1.33169800 | 2.61713800  |
| 1038 | H            | 5.50046900  | -0.31863200 | 0.98752800  | 1082 | C | 2.91969100  | -1.83693000 | 3.62981800  |
| 1039 | H            | 6.00909800  | 0.93504400  | -0.17847100 | 1083 | C | 3.98870000  | -2.67251800 | 3.30171900  |
| 1040 | H            | 5.40228000  | 1.40536500  | 1.44135200  | 1084 | C | 3.43149100  | -2.49897800 | 0.96719900  |
| 1041 | H            | 1.33465400  | -4.84723400 | -0.28444700 | 1085 | C | 4.24792100  | -3.01087800 | 1.97456700  |
| 1042 | H            | -0.31470400 | -4.25160700 | 0.05512500  | 1086 | O | 1.01641800  | -0.52945500 | 2.84846300  |
| 1043 | H            | 0.16332700  | -4.62806400 | -1.62187500 | 1087 | C | -5.10655500 | 1.33171700  | -1.29552900 |
| 1044 |              |             |             |             | 1088 | C | -1.58732500 | 2.72974300  | 2.58971700  |
| 1045 | <b>1INT5</b> |             |             |             | 1089 | C | 4.97505900  | 0.85337500  | -1.33470200 |
| 1046 | N            | -0.20735200 | -1.80582600 | 0.01805300  | 1090 | C | 0.74631900  | -0.13944700 | 4.19341900  |
| 1047 | P            | -1.50566400 | -0.66677500 | -0.15384000 | 1091 | H | 1.97360600  | 5.25041800  | 1.39399500  |
| 1048 | P            | 1.29785900  | -0.93549500 | -0.04029800 | 1092 | H | -0.08245700 | 4.50501000  | 0.22533600  |
| 1049 | Cr           | 0.22561600  | 1.32382500  | 0.06911100  | 1093 | H | 0.29599300  | 6.17990800  | -0.07941100 |
| 1050 | C            | 2.01828500  | 4.94469600  | 0.33882800  | 1094 | H | 0.65121700  | 5.86048600  | -2.34968400 |
| 1051 | C            | 0.63375700  | 5.15792000  | -0.29238100 | 1095 | H | 1.21931400  | 2.19226800  | -2.17251100 |
| 1052 | C            | 0.58042800  | 4.90478700  | -1.81676100 | 1096 | H | 0.01157600  | 0.92430400  | -2.57236000 |
| 1053 | C            | 0.25324500  | 1.75689300  | -1.90983300 | 1097 | H | -1.82341800 | 2.32954000  | -2.06673200 |
| 1054 | C            | -0.87777700 | 2.75612800  | -1.71606200 | 1098 | H | -1.07564100 | 2.90932600  | -0.61337900 |
| 1055 | C            | -0.68174300 | 4.17249800  | -2.29993600 | 1099 | H | -0.65067500 | 4.08345000  | -3.39312500 |
| 1056 | C            | 2.57385700  | 3.50881400  | 0.27186700  | 1100 | H | -1.57041800 | 4.77325400  | -2.06025900 |
| 1057 | C            | 1.73134200  | 2.42549700  | 0.96857300  | 1101 | H | 1.46090800  | 4.33238300  | -2.12990700 |
| 1058 | C            | -0.32478600 | -3.14249800 | 0.62859200  | 1102 | H | 2.73868800  | 5.62150000  | -0.14185700 |
| 1059 | C            | -2.66439900 | -1.40270400 | -1.36544500 | 1103 | H | 2.39410800  | 1.61362800  | 1.29979100  |
| 1060 | C            | -2.44818900 | -0.66068800 | 1.42254200  | 1104 | H | 1.26955600  | 2.83175300  | 1.88682800  |
| 1061 | C            | 2.10628400  | -1.40871400 | -1.61174600 | 1105 | H | 3.57159000  | 3.53865600  | 0.73724300  |
| 1062 | C            | 2.35204900  | -1.65571200 | 1.26587500  | 1106 | H | 2.75918100  | 3.22822200  | -0.77409500 |
| 1063 | C            | -3.81591900 | -0.65380600 | -1.70212300 | 1107 | H | -5.60469500 | -0.56314500 | -2.91324400 |
| 1064 | C            | -4.71712700 | -1.12992900 | -2.65847100 | 1108 | H | -5.17132900 | -2.70690300 | -4.04301000 |
| 1065 | C            | -4.46672700 | -2.34561700 | -3.29969900 | 1109 | H | -1.53608600 | -3.17819600 | -1.81883000 |
| 1066 | C            | -2.42890800 | -2.60563500 | -2.04111900 | 1110 | H | -3.12584900 | -4.02281500 | -3.50740700 |
| 1067 | C            | -3.32360200 | -3.08341600 | -3.00083000 | 1111 | H | -3.46418800 | -2.52786500 | 1.10894200  |
| 1068 | O            | -3.95252100 | 0.53313300  | -1.04258000 | 1112 | H | -4.71295100 | -2.46089200 | 3.24661700  |
| 1069 | C            | -3.32478900 | -1.69137700 | 1.78756500  | 1113 | H | -4.44754400 | -0.49692800 | 4.75850000  |
| 1070 | C            | -4.04088700 | -1.65027600 | 2.98319300  | 1114 | H | -2.95419900 | 1.34904600  | 4.15051600  |
| 1071 | C            | -3.89290200 | -0.55097600 | 3.82628700  | 1115 | H | 0.63343800  | -2.84644400 | -2.22066200 |
| 1072 | C            | -2.31840800 | 0.44693900  | 2.28618100  | 1116 | H | 1.73671200  | -3.36713900 | -4.38153400 |
| 1073 | C            | -3.04045000 | 0.50099500  | 3.48233300  | 1117 | H | 3.83743100  | -2.18512600 | -5.00221700 |
| 1074 | O            | -1.45908200 | 1.47227200  | 1.90294900  | 1118 | H | 4.82881000  | -0.51643000 | -3.48817400 |
| 1075 | C            | 1.55626700  | -2.34569400 | -2.49147700 | 1119 | H | 2.73697600  | -1.58992300 | 4.66844100  |
| 1076 | C            | 2.17280600  | -2.63381200 | -3.71055300 | 1120 | H | 4.61927900  | -3.05911300 | 4.09720300  |

1121 H 3.63359900 -2.75604400 -0.06709000  
1122 H 5.07730200 -3.66431900 1.72362300  
1123 H -1.28637200 -3.58651800 0.36203900  
1124 H 0.46945700 -3.79520500 0.25544500  
1125 H -0.25500500 -3.09488300 1.72112000  
1126 H -6.02454000 0.79329800 -1.03320900  
1127 H -5.00545400 2.21013400 -0.65708900  
1128 H -5.14983300 1.64591300 -2.34497200  
1129 H -0.96542800 3.43792300 2.04480700  
1130 H -2.62942600 3.06312500 2.58084200  
1131 H -1.22533200 2.65499200 3.61997600  
1132 H 5.14120400 1.50186400 -0.47459000  
1133 H 5.81008300 0.14994400 -1.43301600  
1134 H 4.89598900 1.46280100 -2.24243300  
1135 H -0.14771500 0.47992800 4.14794800  
1136 H 0.54712000 -1.01260300 4.82523100  
1137 H 1.57869600 0.43836300 4.61138700  
1138  
1139 **1TS5**  
1140 N 0.28283800 -1.55100400 0.88543700  
1141 P 1.54637300 -0.46118800 0.46704800  
1142 P -1.24110300 -0.84197500 0.39316600  
1143 Cr 0.08346100 1.30943500 -0.53899100  
1144 C -3.06495500 4.02864800 -1.72561800  
1145 C -1.99441000 5.12147800 -1.57070100  
1146 C -1.27972000 5.19995700 -0.19565500  
1147 C 0.29575200 2.56921900 1.08768100  
1148 C 0.64927400 3.36449200 -0.08663200  
1149 C 0.21975000 4.83929300 -0.22746800  
1150 C -2.62094600 2.59661200 -1.38094700  
1151 C -1.29399200 2.16425500 -2.03389900  
1152 C 0.45145200 -2.99835700 1.10434600  
1153 C 2.70981600 -0.42155800 1.87562500  
1154 C 2.50582500 -1.20489400 -0.91013800  
1155 C -2.18428000 -0.65693100 1.96035200  
1156 C -2.11307800 -2.19798100 -0.48752400  
1157 C 3.86144700 0.38969900 1.74992300  
1158 C 4.76713100 0.50289300 2.80863600  
1159 C 4.51968300 -0.17485000 4.00465100  
1160 C 2.47519800 -1.06797900 3.09507300  
1161 C 3.37469000 -0.95412600 4.15664500  
1162 O 3.99340200 1.03476100 0.55503400  
1163 C 3.33186700 -2.32554500 -0.75224500  
1164 C 4.03557700 -2.86477300 -1.82905200

1165 C 3.92664600 -2.26607600 -3.08292700  
1166 C 2.41882000 -0.60812400 -2.18291100  
1167 C 3.12632600 -1.13569400 -3.26601100  
1168 O 1.61610500 0.51945000 -2.30524200  
1169 C -1.61243000 -0.89925700 3.21305000  
1170 C -2.32369800 -0.66272600 4.39146100  
1171 C -3.62347600 -0.16668700 4.31795000  
1172 C -3.49799700 -0.13914400 1.90467000  
1173 C -4.21621000 0.09829200 3.08046500  
1174 O -3.97812300 0.09422000 0.64962200  
1175 C -1.87273500 -2.40076300 -1.86522300  
1176 C -2.53544300 -3.42338500 -2.55397400  
1177 C -3.43557100 -4.24781600 -1.87652000  
1178 C -3.02305800 -3.04198200 0.16357400  
1179 C -3.68362600 -4.06370600 -0.51772000  
1180 O -0.97116000 -1.55823200 -2.45609400  
1181 C 5.14566600 1.84490300 0.33417800  
1182 C 1.84395300 1.37438700 -3.43712700  
1183 C -5.32171800 0.54388100 0.49862500  
1184 C -0.72718900 -1.70574000 -3.85178000  
1185 H -3.42294900 4.04949400 -2.76436600  
1186 H -1.23914900 5.00330900 -2.35979500  
1187 H -2.47596300 6.08332200 -1.78303000  
1188 H -1.35159500 6.22805600 0.17647100  
1189 H -0.64261800 2.80819100 1.59227900  
1190 H 1.08421300 2.25915900 1.77061100  
1191 H 1.71259100 3.27551800 -0.34244300  
1192 H -0.21708100 2.83646200 -1.23328100  
1193 H 0.72213800 5.36013000 0.59930000  
1194 H 0.65763000 5.25090900 -1.14724500  
1195 H -1.80073600 4.58703800 0.55151400  
1196 H -3.93206300 4.28051000 -1.09966600  
1197 H -1.35119800 1.13436800 -2.41377000  
1198 H -1.04534000 2.79075500 -2.89830900  
1199 H -3.41617400 1.90412300 -1.68428600  
1200 H -2.55860800 2.49058800 -0.28987600  
1201 H 5.65463000 1.11718600 2.71418500  
1202 H 5.22771300 -0.07982800 4.82268800  
1203 H 1.57999700 -1.66592700 3.22004800  
1204 H 3.17929200 -1.46964900 5.09152900  
1205 H 3.44176700 -2.76847700 0.23336700  
1206 H 4.66822300 -3.73532800 -1.68750600  
1207 H 4.47177500 -2.67006400 -3.93100300  
1208 H 3.06678100 -0.68092500 -4.24768200

|      |             |             |             |             |      |   |             |             |             |
|------|-------------|-------------|-------------|-------------|------|---|-------------|-------------|-------------|
| 1209 | H           | -0.59413100 | -1.26802400 | 3.26252500  | 1253 | C | -2.84402500 | 2.95176200  | 2.25385800  |
| 1210 | H           | -1.86401800 | -0.86245100 | 5.35433900  | 1254 | O | -1.06980200 | 2.48272900  | 0.65072600  |
| 1211 | H           | -4.18811100 | 0.02331700  | 5.22618200  | 1255 | C | 0.71673100  | -3.46488200 | -0.90422200 |
| 1212 | H           | -5.22644400 | 0.48875800  | 3.04248100  | 1256 | C | 1.23226400  | -4.46222000 | -1.73465700 |
| 1213 | H           | -2.35799400 | -3.58669200 | -3.61001000 | 1257 | C | 2.56041800  | -4.38908400 | -2.14986100 |
| 1214 | H           | -3.94270600 | -5.03769000 | -2.42324200 | 1258 | C | 2.85054100  | -2.32857100 | -0.92214200 |
| 1215 | H           | -3.21956700 | -2.89117400 | 1.22034600  | 1259 | C | 3.37523000  | -3.32731300 | -1.74759500 |
| 1216 | H           | -4.38333300 | -4.70584900 | 0.00789800  | 1260 | O | 3.55816600  | -1.24640700 | -0.48129800 |
| 1217 | H           | 1.40031900  | -3.19076100 | 1.61027600  | 1261 | C | 1.56049400  | -0.22621200 | 3.15754200  |
| 1218 | H           | -0.35575200 | -3.37233400 | 1.74023000  | 1262 | C | 2.24124400  | -0.35398300 | 4.37443400  |
| 1219 | H           | 0.43857000  | -3.55625800 | 0.16130500  | 1263 | C | 3.05604700  | -1.46345000 | 4.60359800  |
| 1220 | H           | 6.06526000  | 1.25331700  | 0.41023700  | 1264 | C | 2.52557200  | -2.31739100 | 2.41790500  |
| 1221 | H           | 5.04658900  | 2.23212900  | -0.68060200 | 1265 | C | 3.19795000  | -2.45191900 | 3.63189200  |
| 1222 | H           | 5.18450000  | 2.68110300  | 1.04219800  | 1266 | O | 0.72278400  | 0.81124100  | 2.86956100  |
| 1223 | H           | 1.28541200  | 2.28858100  | -3.24226700 | 1267 | C | -5.02493600 | 1.52430400  | -2.22743300 |
| 1224 | H           | 2.91011800  | 1.60090000  | -3.53473900 | 1268 | C | -0.66270800 | 3.85294400  | 0.71657700  |
| 1225 | H           | 1.47537200  | 0.91557600  | -4.36044900 | 1269 | C | 4.97425400  | -1.23977200 | -0.65178300 |
| 1226 | H           | -5.48930400 | 0.62354200  | -0.57593800 | 1270 | C | 0.49679300  | 1.79151800  | 3.87911400  |
| 1227 | H           | -6.02933200 | -0.17595400 | 0.92641600  | 1271 | H | -5.92891100 | -0.79155600 | -2.72818000 |
| 1228 | H           | -5.46845500 | 1.52536000  | 0.96525400  | 1272 | H | -5.97337600 | -3.24932600 | -2.60646900 |
| 1229 | H           | -0.01173400 | -0.92566600 | -4.10930700 | 1273 | H | -2.40440700 | -3.22249500 | -0.23036700 |
| 1230 | H           | -0.29231300 | -2.68607000 | -4.07866900 | 1274 | H | -4.20336700 | -4.48133200 | -1.35908100 |
| 1231 | H           | -1.64604600 | -1.56563500 | -4.43324600 | 1275 | H | -4.16708900 | -0.64615800 | 1.70173000  |
| 1232 |             |             |             |             | 1276 | H | -5.30493400 | 0.84444500  | 3.31955500  |
| 1233 | <b>1SC3</b> |             |             |             | 1277 | H | -4.46357600 | 3.16750500  | 3.64545300  |
| 1234 | N           | -0.81968600 | -1.42125900 | 0.85057800  | 1278 | H | -2.50588600 | 3.97010700  | 2.40348700  |
| 1235 | P           | -1.79053100 | -0.30362700 | -0.04212000 | 1279 | H | -0.31701000 | -3.51118400 | -0.58237200 |
| 1236 | P           | 0.85027400  | -1.01203500 | 0.54108400  | 1280 | H | 0.60174300  | -5.28755400 | -2.05010000 |
| 1237 | Cr          | 0.12465600  | 0.86969000  | -1.05298900 | 1281 | H | 2.97460700  | -5.15909900 | -2.79423300 |
| 1238 | C           | -1.26169400 | -2.17594700 | 2.03594400  | 1282 | H | 4.40538600  | -3.28457400 | -2.08176500 |
| 1239 | C           | -3.13558500 | -1.28336500 | -0.80601600 | 1283 | H | 2.14193400  | 0.40022700  | 5.14538200  |
| 1240 | C           | -2.65251500 | 0.78070700  | 1.16329000  | 1284 | H | 3.57712000  | -1.54974900 | 5.55279600  |
| 1241 | C           | 1.51050900  | -2.39546500 | -0.47835400 | 1285 | H | 2.63532800  | -3.08798400 | 1.66278700  |
| 1242 | C           | 1.70648000  | -1.21050200 | 2.15348000  | 1286 | H | 3.82358400  | -3.31999300 | 3.81391700  |
| 1243 | C           | -4.13740400 | -0.59962500 | -1.53456200 | 1287 | H | -2.29741800 | -2.49766300 | 1.90350400  |
| 1244 | C           | -5.15710900 | -1.31176200 | -2.17351800 | 1288 | H | -0.63963900 | -3.06611200 | 2.16336400  |
| 1245 | C           | -5.17795400 | -2.70634900 | -2.10442500 | 1289 | H | -1.19926800 | -1.56946600 | 2.94641100  |
| 1246 | C           | -3.17447000 | -2.68251100 | -0.76837400 | 1290 | H | -6.01131200 | 1.35580500  | -1.78027800 |
| 1247 | C           | -4.18898600 | -3.39716300 | -1.40774200 | 1291 | H | -4.73737400 | 2.56748700  | -2.09270100 |
| 1248 | O           | -4.02239600 | 0.75813600  | -1.56163400 | 1292 | H | -5.05817500 | 1.28926200  | -3.29762400 |
| 1249 | C           | -3.78093600 | 0.35429100  | 1.87486000  | 1293 | H | 0.18413100  | 3.94583200  | 0.03717200  |
| 1250 | C           | -4.43312400 | 1.19548000  | 2.77657900  | 1294 | H | -1.47049800 | 4.51716800  | 0.39054800  |
| 1251 | C           | -3.96114700 | 2.49372600  | 2.95739700  | 1295 | H | -0.34585800 | 4.12415200  | 1.72925300  |
| 1252 | C           | -2.18362000 | 2.09669800  | 1.36494900  | 1296 | H | 5.33184100  | -0.34918900 | -0.13363800 |

1297 H 5.42676900 -2.13227700 -0.20425000  
1298 H 5.25075900 -1.18023100 -1.71093000  
1299 H -0.25219200 2.46972300 3.47292600  
1300 H 0.10446300 1.33424800 4.79490500  
1301 H 1.41521200 2.34475000 4.10944600  
1302 C -0.81279900 1.21435300 -2.94026000  
1303 C -0.04314200 2.33927300 -2.57321600  
1304 C 1.37095300 2.58387600 -3.08597100  
1305 C 2.38945700 1.58290900 -2.50479200  
1306 C 3.84350500 1.79675400 -2.97012400  
1307 C 4.52079900 3.13367600 -2.61220400  
1308 C 4.78646100 3.39430300 -1.11380200  
1309 C 3.64178600 4.06392800 -0.33957500  
1310 H -1.89579300 1.24447000 -2.87592700  
1311 H -0.41699900 0.47775600 -3.64329500  
1312 H 2.74060000 3.44052600 -0.30140100  
1313 H -0.58276300 3.21480000 -2.20981300  
1314 H 1.67662900 3.60144900 -2.81948600  
1315 H 1.40796400 2.52720500 -4.18449000  
1316 H 2.10226600 0.55922700 -2.79407400  
1317 H 2.37396300 1.61710300 -1.39536500  
1318 H 3.85580400 1.68595500 -4.06331100  
1319 H 4.45761600 0.97768200 -2.57429000  
1320 H 3.95430500 3.97404700 -3.03593900  
1321 H 5.48438900 3.13935700 -3.13742000  
1322 H 5.66792700 4.04199200 -1.02854200  
1323 H 5.06316400 2.45044000 -0.62114000  
1324 H 3.36605300 5.02005900 -0.80125900  
1325 H 3.94017400 4.27066000 0.69472800  
1326  
1327 **1P'**  
1328 N 1.14277500 1.41830100 0.65063700  
1329 P 1.98786200 0.10606800 -0.11548000  
1330 P -0.54989000 1.38393900 0.21984100  
1331 Cr -0.31688200 -0.88711200 -1.07882600  
1332 C -4.47509700 -3.69222700 -0.53852100  
1333 C -3.10209800 -3.35640500 -1.15103400  
1334 C -3.07672900 -3.38729600 -2.68778400  
1335 C -1.60244200 -0.70250800 -3.05017000  
1336 C -1.01169800 -1.90235100 -3.31089600  
1337 C -1.68081200 -3.25992600 -3.31845200  
1338 C -5.61335600 -2.70464600 -0.84875500  
1339 C -5.41063600 -1.30309300 -0.26042700  
1340 C 1.60982300 2.09855200 1.87279900

1341 C 3.60270800 0.80918900 -0.63213900  
1342 C 2.43489800 -1.06451600 1.23849800  
1343 C -0.87453600 3.02813700 -0.53329700  
1344 C -1.45373800 1.45040900 1.81687800  
1345 C 4.57161200 -0.07391300 -1.16308400  
1346 C 5.79162900 0.41367400 -1.64025900  
1347 C 6.04584700 1.78711800 -1.61679100  
1348 C 3.87509300 2.18205700 -0.64948900  
1349 C 5.08938500 2.67557000 -1.13163400  
1350 O 4.21455500 -1.39102600 -1.18178200  
1351 C 3.38429800 -0.76766900 2.22674500  
1352 C 3.68345400 -1.66958400 3.24763300  
1353 C 3.03325400 -2.90196600 3.28199300  
1354 C 1.80018100 -2.32115100 1.28604900  
1355 C 2.09624800 -3.23422400 2.30170000  
1356 O 0.88026000 -2.62736600 0.28624500  
1357 C 0.13447700 3.96732100 -0.76885400  
1358 C -0.13616400 5.17427200 -1.41753100  
1359 C -1.43392300 5.44446600 -1.84592800  
1360 C -2.18120700 3.31002000 -0.99265000  
1361 C -2.45946600 4.51789300 -1.63953700  
1362 O -3.10617000 2.33372100 -0.75895600  
1363 C -1.79321200 0.24110400 2.46417500  
1364 C -2.48618100 0.26207500 3.67985100  
1365 C -2.84435000 1.48325800 4.25461600  
1366 C -1.83506100 2.65853500 2.41513700  
1367 C -2.52408100 2.68553500 3.62741900  
1368 O -1.40999500 -0.91872000 1.84001100  
1369 C 5.14387300 -2.34698500 -1.68138800  
1370 C 0.73372300 -4.01481000 -0.04864500  
1371 C -4.46663100 2.58471700 -1.10038400  
1372 C -1.73208100 -2.15718900 2.46659000  
1373 H -4.36320900 -3.76727400 0.55278200  
1374 H -2.76172100 -2.37667600 -0.78118600  
1375 H -2.37498700 -4.09270800 -0.77811600  
1376 H -3.50096400 -4.34418200 -3.01861900  
1377 H -2.64150200 -0.62595900 -2.74070800  
1378 H -1.11106600 0.23104500 -3.31937100  
1379 H -0.00595700 -1.89007600 -3.73646200  
1380 H -4.52017000 -0.80802600 -0.66743300  
1381 H -1.74920400 -3.54573200 -4.38016400  
1382 H -1.00503100 -4.00798100 -2.87923800  
1383 H -3.73594800 -2.61316600 -3.09951500  
1384 H -4.77095000 -4.69343200 -0.88123900



|      |           |             |             |             |      |   |             |             |             |
|------|-----------|-------------|-------------|-------------|------|---|-------------|-------------|-------------|
| 1385 | H         | -6.27371200 | -0.66250600 | -0.47515900 | 1429 | C | -0.70903200 | -2.95723500 | 3.07986600  |
| 1386 | H         | -5.29380500 | -1.34404300 | 0.82994900  | 1430 | C | 0.62561600  | -3.02749000 | 2.90183900  |
| 1387 | H         | -6.54582800 | -3.12398600 | -0.45037500 | 1431 | C | 0.01251400  | 0.04150700  | -2.03877600 |
| 1388 | H         | -5.76124500 | -2.63131300 | -1.93425600 | 1432 | C | 2.58261800  | -1.40441100 | -0.27115600 |
| 1389 | H         | 6.53989000  | -0.26227700 | -2.03690200 | 1433 | C | 2.28417100  | 1.46264900  | -0.01535700 |
| 1390 | H         | 6.99573500  | 2.15666000  | -1.99201400 | 1434 | C | -2.18200700 | 1.54004500  | 0.03346000  |
| 1391 | H         | 3.12685100  | 2.87656600  | -0.28616800 | 1435 | C | -2.57617600 | -1.31642800 | -0.28975000 |
| 1392 | H         | 5.28146700  | 3.74392600  | -1.12675300 | 1436 | C | 3.94639600  | -1.37187200 | 0.08885300  |
| 1393 | H         | 3.91768700  | 0.17703900  | 2.17905100  | 1437 | C | 4.80672100  | -2.39524700 | -0.27613700 |
| 1394 | H         | 4.42289100  | -1.41588300 | 4.00089400  | 1438 | C | 4.33199500  | -3.49459100 | -1.01484500 |
| 1395 | H         | 3.25538800  | -3.61780700 | 4.06807600  | 1439 | C | 2.12041300  | -2.51028400 | -0.99590000 |
| 1396 | H         | 1.60744500  | -4.20113200 | 2.33787900  | 1440 | C | 2.97867200  | -3.54613600 | -1.37516700 |
| 1397 | H         | 1.14482600  | 3.74527900  | -0.44456800 | 1441 | O | 5.25362800  | -4.43613800 | -1.32297600 |
| 1398 | H         | 0.66010400  | 5.89287700  | -1.58465400 | 1442 | C | 2.02539600  | 2.57483600  | 0.81104100  |
| 1399 | H         | -1.65933100 | 6.37921700  | -2.35112700 | 1443 | C | 2.58825700  | 3.81330900  | 0.54895700  |
| 1400 | H         | -3.46118700 | 4.74207400  | -1.98679100 | 1444 | C | 3.44086400  | 3.97883100  | -0.55758600 |
| 1401 | H         | -2.75040400 | -0.65862900 | 4.18564900  | 1445 | C | 3.13693700  | 1.64339900  | -1.11548900 |
| 1402 | H         | -3.38075700 | 1.48485100  | 5.19923000  | 1446 | C | 3.71400100  | 2.88235400  | -1.39085000 |
| 1403 | H         | -1.59137300 | 3.59211900  | 1.91697600  | 1447 | O | 3.94612100  | 5.22053000  | -0.72605500 |
| 1404 | H         | -2.80619700 | 3.63373900  | 4.07419200  | 1448 | C | -2.11095800 | 2.54652700  | 1.01684900  |
| 1405 | H         | 2.68973700  | 2.25678100  | 1.82327200  | 1449 | C | -2.63035200 | 3.81203700  | 0.79372000  |
| 1406 | H         | 1.12909900  | 3.07690000  | 1.95827700  | 1450 | C | -3.23956500 | 4.11546000  | -0.43677400 |
| 1407 | H         | 1.38106700  | 1.51945800  | 2.77469100  | 1451 | C | -2.79914500 | 1.85719900  | -1.18807500 |
| 1408 | H         | 6.06801300  | -2.34918900 | -1.09128900 | 1452 | C | -3.32249300 | 3.12615300  | -1.43035500 |
| 1409 | H         | 4.65315500  | -3.31684400 | -1.58771400 | 1453 | O | -3.71405900 | 5.37411000  | -0.56036800 |
| 1410 | H         | 5.38149400  | -2.15873100 | -2.73537700 | 1454 | C | -3.96203800 | -1.10279700 | -0.29796400 |
| 1411 | H         | 0.21417500  | -4.04349200 | -1.00646300 | 1455 | C | -4.85193600 | -2.10497100 | -0.68988900 |
| 1412 | H         | 1.71426400  | -4.49163200 | -0.14360300 | 1456 | C | -4.36252700 | -3.35819800 | -1.08336900 |
| 1413 | H         | 0.13575900  | -4.54751300 | 0.69890200  | 1457 | C | -2.10314300 | -2.58946900 | -0.66916500 |
| 1414 | H         | -5.01974300 | 1.69919600  | -0.78644800 | 1458 | C | -2.97523500 | -3.59066400 | -1.06830800 |
| 1415 | H         | -4.85097400 | 3.46378700  | -0.56986900 | 1459 | O | -5.12749300 | -4.39829600 | -1.48694300 |
| 1416 | H         | -4.58690600 | 2.72784100  | -2.18131600 | 1460 | C | 4.84608800  | -5.58010000 | -2.06710900 |
| 1417 | H         | -1.34571900 | -2.92986100 | 1.80327900  | 1461 | C | 4.83265000  | 5.46444600  | -1.81542400 |
| 1418 | H         | -1.24995400 | -2.24252500 | 3.44721800  | 1462 | C | -4.35108300 | 5.75879300  | -1.77636500 |
| 1419 | H         | -2.81624800 | -2.27783900 | 2.57577900  | 1463 | C | -6.54305500 | -4.23868200 | -1.52086500 |
| 1420 |           |             |             |             | 1464 | H | 1.40064000  | -0.44359200 | 5.06470100  |
| 1421 |           |             |             |             | 1465 | H | -1.08979500 | -0.34114800 | 5.20834600  |
| 1422 | <b>2R</b> |             |             |             | 1466 | H | -1.06350500 | 1.35320600  | 4.47128700  |
| 1423 | N         | 0.01684500  | -0.23837300 | -0.59267400 | 1467 | H | -1.14627600 | -2.86600000 | 4.07165500  |
| 1424 | P         | 1.45480000  | -0.11611200 | 0.37788000  | 1468 | H | 1.31503500  | -2.99393300 | 3.74245900  |
| 1425 | P         | -1.41339800 | -0.07674900 | 0.39195600  | 1469 | H | 1.06650000  | -3.20168900 | 1.92264900  |
| 1426 | Cr        | 0.03440000  | -0.49221900 | 2.53886400  | 1470 | H | 1.42850100  | 1.25011800  | 4.32455300  |
| 1427 | C         | 0.84202100  | 0.39893900  | 4.66352200  | 1471 | H | -1.40437100 | -3.07350100 | 2.25135300  |
| 1428 | C         | -0.51358700 | 0.45517000  | 4.74363600  | 1472 | H | 4.34222600  | -0.53163600 | 0.65315900  |

|      |             |             |             |             |      |   |             |             |             |
|------|-------------|-------------|-------------|-------------|------|---|-------------|-------------|-------------|
| 1473 | H           | 5.85740700  | -2.36966900 | -0.00549500 | 1517 | C | 3.21514700  | -1.68722800 | -1.28037400 |
| 1474 | H           | 1.07681800  | -2.56665800 | -1.28922100 | 1518 | C | 3.86571300  | -2.86668400 | -1.64083300 |
| 1475 | H           | 2.58577200  | -4.37703400 | -1.94962800 | 1519 | C | 1.82995400  | 2.46472000  | -0.60912200 |
| 1476 | H           | 1.37079800  | 2.46461500  | 1.67292300  | 1520 | C | 2.59452900  | 3.60175200  | -0.81831800 |
| 1477 | H           | 2.39497900  | 4.67078900  | 1.18537900  | 1521 | C | 3.97892800  | 3.58347800  | -0.56856600 |
| 1478 | H           | 3.37218100  | 0.80469200  | -1.76395800 | 1522 | C | 3.80012500  | 1.26286800  | 0.09656400  |
| 1479 | H           | 4.37144200  | 2.98366600  | -2.24649200 | 1523 | C | 4.57900100  | 2.40328400  | -0.10525400 |
| 1480 | H           | -1.64508900 | 2.32800000  | 1.97520500  | 1524 | C | -2.01555600 | 2.77507500  | 0.59202100  |
| 1481 | H           | -2.58410200 | 4.58660200  | 1.55239200  | 1525 | C | -2.60001400 | 3.98757000  | 0.26241800  |
| 1482 | H           | -2.89065300 | 1.10156000  | -1.96258200 | 1526 | C | -3.43461200 | 4.08396800  | -0.86640600 |
| 1483 | H           | -3.79250600 | 3.33391100  | -2.38446700 | 1527 | C | -3.07595500 | 1.73104600  | -1.30802800 |
| 1484 | H           | -4.36648100 | -0.14034100 | -0.00028900 | 1528 | C | -3.66971900 | 2.94399600  | -1.65275100 |
| 1485 | H           | -5.91559800 | -1.89734100 | -0.68778500 | 1529 | C | -1.96960700 | -2.51623100 | -0.61742700 |
| 1486 | H           | -1.03650800 | -2.79340200 | -0.65927500 | 1530 | C | -2.79884300 | -3.60428500 | -0.83991300 |
| 1487 | H           | -2.61193400 | -4.56640200 | -1.37502700 | 1531 | C | -4.18415400 | -3.49976200 | -0.61710200 |
| 1488 | H           | 0.92699700  | -0.35157300 | -2.49088700 | 1532 | C | -3.87593600 | -1.19202700 | 0.04539300  |
| 1489 | H           | -0.83926900 | -0.46366500 | -2.50453700 | 1533 | C | -4.71940400 | -2.28302700 | -0.16902600 |
| 1490 | H           | -0.04998700 | 1.11629400  | -2.24538800 | 1534 | H | 2.57405900  | -4.93647500 | 0.73164600  |
| 1491 | H           | 5.74291900  | -6.18824000 | -2.18925400 | 1535 | H | 3.42051200  | -0.78466700 | -1.84817400 |
| 1492 | H           | 4.08524000  | -6.15685500 | -1.52665200 | 1536 | H | 4.54988700  | -2.86006900 | -2.48120600 |
| 1493 | H           | 4.46020400  | -5.29728300 | -3.05433500 | 1537 | H | 0.76154500  | 2.50732200  | -0.80015300 |
| 1494 | H           | 5.10676600  | 6.51724500  | -1.74211200 | 1538 | H | 2.14663900  | 4.52305900  | -1.17665000 |
| 1495 | H           | 5.73510600  | 4.84589500  | -1.73971000 | 1539 | H | 5.64279200  | 2.36018400  | 0.09666400  |
| 1496 | H           | 4.34022500  | 5.28145300  | -2.77819600 | 1540 | H | -2.43536800 | 4.87712700  | 0.86163200  |
| 1497 | H           | -4.64215500 | 6.80058900  | -1.63927200 | 1541 | H | -3.27967200 | 0.85893800  | -1.92230700 |
| 1498 | H           | -3.66406100 | 5.68059400  | -2.62762600 | 1542 | H | -4.31003700 | 2.99276200  | -2.52566500 |
| 1499 | H           | -5.24485300 | 5.15232000  | -1.96655400 | 1543 | H | -0.90238500 | -2.62172100 | -0.79089600 |
| 1500 | H           | -6.93955200 | -5.19264600 | -1.86981300 | 1544 | H | -2.40210600 | -4.55246300 | -1.18831700 |
| 1501 | H           | -6.94331600 | -4.02000400 | -0.52327700 | 1545 | H | -5.78238800 | -2.17359100 | 0.01084600  |
| 1502 | H           | -6.83783100 | -3.44426400 | -2.21745500 | 1546 | H | 0.09937800  | 0.92628200  | -2.66521500 |
| 1503 |             |             |             |             | 1547 | H | 0.82529300  | -0.70099400 | -2.62983700 |
| 1504 | <b>2SC1</b> |             |             |             | 1548 | H | -0.93463800 | -0.52605600 | -2.62946400 |
| 1505 | N           | -0.00303600 | -0.09398700 | -0.79409400 | 1549 | C | 2.09930400  | -0.03799100 | 3.18061000  |
| 1506 | P           | 1.36529400  | -0.16475000 | 0.25269200  | 1550 | H | 2.58589400  | -0.96173000 | 2.87621600  |
| 1507 | P           | -1.36261000 | 0.08276900  | 0.25038300  | 1551 | H | 2.53917700  | 0.87687800  | 2.78975800  |
| 1508 | Cr          | 0.00002100  | -0.05967300 | 2.36062000  | 1552 | C | 1.30123000  | -0.00611800 | 4.30765600  |
| 1509 | C           | -0.00268200 | -0.08742300 | -2.26177500 | 1553 | H | 1.15252200  | -0.89951000 | 4.90489700  |
| 1510 | C           | 2.32158400  | -1.64743700 | -0.19736500 | 1554 | H | 1.10653900  | 0.93397900  | 4.81426200  |
| 1511 | C           | 2.42029200  | 1.26583300  | -0.15966300 | 1555 | C | -1.30626100 | -0.14624600 | 4.30423900  |
| 1512 | C           | -2.24021800 | 1.61946200  | -0.18475200 | 1556 | H | -1.11174900 | -1.09403300 | 4.79631900  |
| 1513 | C           | -2.49408500 | -1.28176400 | -0.18195000 | 1557 | H | -1.15923700 | 0.73780200  | 4.91566300  |
| 1514 | C           | 2.09780400  | -2.83997000 | 0.52242200  | 1558 | C | -2.10165500 | -0.09758400 | 3.17606200  |
| 1515 | C           | 2.73774900  | -4.01881600 | 0.17613000  | 1559 | H | -2.58870100 | 0.83029900  | 2.88499600  |
| 1516 | C           | 3.62989800  | -4.04376500 | -0.91230900 | 1560 | H | -2.53976500 | -1.00617800 | 2.76923800  |

1561 H -1.37454100 2.72352100 1.46955000  
1562 H 4.28856300 0.35937300 0.44982900  
1563 H -4.31422500 -0.25832700 0.38543200  
1564 H 1.41328300 -2.84334000 1.36807500  
1565 O -3.95808600 5.30479100 -1.10321300  
1566 O 4.63258600 4.74257500 -0.80474700  
1567 O 4.20469400 -5.23712400 -1.16855600  
1568 O -4.90314800 -4.61719500 -0.86309900  
1569 C 6.03723300 4.80303800 -0.56978100  
1570 H 6.57812500 4.09330000 -1.20753200  
1571 H 6.33534000 5.82032000 -0.82495400  
1572 H 6.27341700 4.60647500 0.48308900  
1573 C -4.82322100 5.48421400 -2.22320900  
1574 H -5.11627900 6.53409200 -2.20277200  
1575 H -4.30421700 5.26778200 -3.16464700  
1576 H -5.71635600 4.85356900 -2.13966600  
1577 C -6.31307500 -4.59075600 -0.65468900  
1578 H -6.79748500 -3.85208200 -1.30485300  
1579 H -6.66791400 -5.58903500 -0.91229200  
1580 H -6.55641300 -4.37558100 0.39287500  
1581 C 5.12871400 -5.34474600 -2.25011700  
1582 H 5.45473600 -6.38503600 -2.25554800  
1583 H 4.64913900 -5.10682300 -3.20713500  
1584 H 5.99550400 -4.69062900 -2.09784400  
1585

1586 **2TS1**

1587 N -0.00281300 -0.09150800 -0.83476600  
1588 P 1.36795600 -0.16040300 0.21083900  
1589 P -1.36508800 0.08092000 0.20909900  
1590 Cr 0.00071800 -0.06135700 2.30894600  
1591 C -0.00481100 -0.08651500 -2.30299700  
1592 C 2.35035000 -1.61629600 -0.26044200  
1593 C 2.40397900 1.29501700 -0.15241100  
1594 C -2.27044700 1.59244100 -0.24743400  
1595 C -2.47739100 -1.31106100 -0.17580000  
1596 C 2.12453000 -2.83476900 0.41374700  
1597 C 2.78949900 -3.99229800 0.04424500  
1598 C 3.70957100 -3.96849300 -1.02086700  
1599 C 3.27204700 -1.60665400 -1.32021200  
1600 C 3.94807800 -2.76442800 -1.70292500  
1601 C 1.81375700 2.48281500 -0.62883700  
1602 C 2.56708500 3.63408100 -0.79906200  
1603 C 3.93725600 3.64018700 -0.48112700  
1604 C 3.76900800 1.31580300 0.17270500

1605 C 4.53548700 2.47012900 0.01068200  
1606 C -2.03751200 2.77586900 0.48363800  
1607 C -2.64644300 3.96914300 0.12989100  
1608 C -3.51476500 4.01715000 -0.97648100  
1609 C -3.14004200 1.65502700 -1.34852200  
1610 C -3.75885100 2.84838900 -1.71638600  
1611 C -1.94765600 -2.53474400 -0.63306500  
1612 C -2.76477900 -3.63909900 -0.81852200  
1613 C -4.14034100 -3.56106300 -0.53458700  
1614 C -3.84905700 -1.24721600 0.11335400  
1615 C -4.67919600 -2.35436700 -0.06310300  
1616 H 2.62520200 -4.93032900 0.56441800  
1617 H 3.47900900 -0.68227300 -1.85110200  
1618 H 4.65374600 -2.72024600 -2.52413900  
1619 H 0.75539600 2.50609400 -0.87157400  
1620 H 2.12083800 4.54768600 -1.17851600  
1621 H 5.58848000 2.44666300 0.26552800  
1622 H -2.47627700 4.88051200 0.69373100  
1623 H -3.35042200 0.75971700 -1.92601000  
1624 H -4.42510800 2.85981600 -2.57097700  
1625 H -0.88710200 -2.61971100 -0.85229700  
1626 H -2.36550200 -4.57972400 -1.18405300  
1627 H -5.73501800 -2.26609800 0.16431400  
1628 H 0.83662500 -0.68145200 -2.67100200  
1629 H -0.92726100 -0.54607900 -2.66928800  
1630 H 0.07355500 0.92869200 -2.70782900  
1631 C 1.79531500 -0.24004600 3.29920500  
1632 H 2.34899700 -1.12689000 2.99221800  
1633 H 2.38830000 0.67461700 3.23551400  
1634 C 0.91613700 -0.38271700 4.45700700  
1635 H 0.78105500 -1.41396000 4.78242100  
1636 H 1.13639300 0.26710300 5.30131800  
1637 C -0.92027800 0.21053200 4.46215300  
1638 H -1.14310700 -0.46018200 5.28929400  
1639 H -0.78539800 1.23320900 4.81358400  
1640 C -1.79612100 0.09726100 3.29876400  
1641 H -2.34772000 0.99209400 3.01162300  
1642 H -2.39026300 -0.81454600 3.21060200  
1643 H 4.25435500 0.42077000 0.55123500  
1644 H -1.37249400 2.76076100 1.34392500  
1645 H -4.28880300 -0.32206100 0.47449600  
1646 H 1.42064600 -2.87456200 1.24183100  
1647 O 4.58096300 4.81136300 -0.68350300  
1648 O -4.06011300 5.22304900 -1.23890200

1649 O -4.84801200 -4.69248000 -0.74820400  
1650 O 4.30717200 -5.14487700 -1.30204500  
1651 C 5.97091100 4.89646800 -0.37950400  
1652 H 6.55530600 4.19755200 -0.99026800  
1653 H 6.26301600 5.91932900 -0.61889000  
1654 H 6.15845000 4.70242700 0.68358900  
1655 C -4.95993100 5.35392200 -2.33807600  
1656 H -5.26503700 6.40054500 -2.34494400  
1657 H -4.46623900 5.11077100 -3.28657400  
1658 H -5.84245700 4.71660300 -2.20634800  
1659 C -6.24751400 -4.69286000 -0.47773200  
1660 H -6.77430800 -3.96411000 -1.10577200  
1661 H -6.59422200 -5.69795500 -0.71946800  
1662 H -6.44851900 -4.48156700 0.57957000  
1663 C 5.26023600 -5.20362800 -2.36194100  
1664 H 5.60036500 -6.23891000 -2.39410900  
1665 H 4.80239800 -4.93910900 -3.32261300  
1666 H 6.11381000 -4.54415600 -2.16476700  
1667

1668 **2INT1**

1669 N -0.15196500 -0.36722900 -0.70002300  
1670 P 1.32147000 0.02080400 0.10734400  
1671 P -1.48322400 -0.35403700 0.43580200  
1672 Cr 0.40994200 -0.48096400 2.34301600  
1673 C 1.91619600 -0.17041200 3.67547800  
1674 C 2.53257900 -1.54266100 3.97890300  
1675 C 0.73663300 -2.49233700 2.52575300  
1676 C 1.42643700 -2.60890600 3.88799100  
1677 C -0.33317400 -0.20578400 -2.15340000  
1678 C 2.60364600 -1.01254900 -0.65457100  
1679 C 1.80401200 1.74420200 -0.20109900  
1680 C -2.46848900 1.15440200 0.16020400  
1681 C -2.54101000 -1.74199600 -0.09776600  
1682 C 3.94660800 -0.60369900 -0.64285100  
1683 C 4.95905200 -1.43319000 -1.12265100  
1684 C 4.63948900 -2.70361300 -1.62666700  
1685 C 2.29966400 -2.29772000 -1.14914700  
1686 C 3.29655100 -3.12601300 -1.63712000  
1687 C 1.68711500 2.68437100 0.83303900  
1688 C 1.99543400 4.02942300 0.63500400  
1689 C 2.42734600 4.45924300 -0.62920000  
1690 C 2.24946100 2.19150300 -1.46445700  
1691 C 2.55189200 3.52540200 -1.67695400  
1692 C -2.44916300 2.15502600 1.15252400

1693 C -3.13578100 3.34761000 0.98787500  
1694 C -3.86642700 3.58178200 -0.19072800  
1695 C -3.21132400 1.39944700 -1.00743700  
1696 C -3.90179900 2.59568400 -1.19103300  
1697 C -1.95416400 -2.97075100 -0.46505200  
1698 C -2.73446000 -4.07545500 -0.76370700  
1699 C -4.13720500 -3.99623000 -0.68199300  
1700 C -3.93929500 -1.67947900 -0.00759800  
1701 C -4.73600700 -2.78866900 -0.29608600  
1702 H 2.65268200 0.61305000 3.46241000  
1703 H 3.30621800 -1.76784400 3.23190000  
1704 H 3.02678500 -1.56913700 4.96066200  
1705 H -0.22451400 -3.01713400 2.44323600  
1706 H 0.69670600 -2.44405800 4.69631900  
1707 H 1.82306300 -3.62351800 4.04471400  
1708 H 1.29850000 0.17433600 4.53428700  
1709 H 1.39574400 -2.78374600 1.69868800  
1710 H 5.98405200 -1.08251600 -1.10336600  
1711 H 1.27081100 -2.64276800 -1.16604000  
1712 H 3.06787100 -4.10997600 -2.03337400  
1713 H 1.36684800 2.36770700 1.82341100  
1714 H 1.90415600 4.72534200 1.46039900  
1715 H 2.89559400 3.87882100 -2.64369700  
1716 H -3.13115400 4.11510600 1.75494800  
1717 H -3.26964300 0.64229500 -1.78373100  
1718 H -4.46420200 2.75007100 -2.10441300  
1719 H -0.87360300 -3.05931400 -0.52130700  
1720 H -2.28676100 -5.01885600 -1.05917700  
1721 H -5.81326500 -2.69974100 -0.21951100  
1722 H 0.56826100 -0.54090500 -2.67389300  
1723 H -1.16676000 -0.83296200 -2.48171100  
1724 H -0.53744500 0.83698100 -2.42333700  
1725 H -4.42652200 -0.75574700 0.28797400  
1726 H -1.89612500 1.99256500 2.07558200  
1727 H 2.37318300 1.48594400 -2.28063800  
1728 H 4.21582900 0.37678800 -0.26209400  
1729 O -4.80629900 -5.12897900 -0.99025700  
1730 O -4.49798100 4.77271500 -0.26086200  
1731 O 2.75237200 5.73020400 -0.94140800  
1732 O 5.53291400 -3.58539200 -2.12048200  
1733 C -5.27422700 5.07967300 -1.41756200  
1734 H -5.68226000 6.07533000 -1.24200900  
1735 H -4.65289200 5.09327100 -2.32109300  
1736 H -6.09632300 4.36531800 -1.54497600

1737 C -6.22978000 -5.13138700 -0.91565300  
1738 H -6.53813900 -6.13811100 -1.19894700  
1739 H -6.57487600 -4.91654000 0.10296900  
1740 H -6.66586900 -4.40601700 -1.61332400  
1741 C 2.66966800 6.73604800 0.06706800  
1742 H 3.34468400 6.51588000 0.90263100  
1743 H 2.97941400 7.66282100 -0.41624000  
1744 H 1.64319400 6.84202100 0.43805500  
1745 C 6.91608800 -3.23606900 -2.13636800  
1746 H 7.43091500 -4.09427400 -2.56871700  
1747 H 7.09445900 -2.35093600 -2.75862100  
1748 H 7.29140500 -3.05708100 -1.12175600  
1749

1750 2INT2

1751 N 0.09350600 -0.05758100 -0.89945800  
1752 P -1.29863500 0.23930800 0.07324100  
1753 P 1.49169600 -0.30260800 0.09749500  
1754 Cr -0.07615200 -0.01131500 2.26697700  
1755 C -0.71295800 -1.93147800 2.65692300  
1756 C -2.08152300 -1.82987300 3.32942100  
1757 C -1.60656600 0.61606600 3.53319100  
1758 C -2.07643700 -0.63344700 4.29383900  
1759 C 2.21223200 0.01020800 3.51382800  
1760 C 1.33606600 0.52041400 4.40032100  
1761 C 0.11475500 0.04765200 -2.36704400  
1762 C -1.97485300 1.87818400 -0.33924400  
1763 C -2.54727100 -0.96965500 -0.46586400  
1764 C 2.34423600 -1.78854700 -0.51849200  
1765 C 2.62057200 1.09365800 -0.25763200  
1766 C -1.70614000 2.96277500 0.52176400  
1767 C -2.13838200 4.24389500 0.21827100  
1768 C -2.85947600 4.48292800 -0.96614300  
1769 C -2.70199400 2.13067300 -1.51442700  
1770 C -3.14153700 3.41390000 -1.83306700  
1771 C -2.15023400 -2.23111300 -0.95375000  
1772 C -3.09075200 -3.19821400 -1.27092200  
1773 C -4.46244100 -2.94187400 -1.09088100  
1774 C -3.91725600 -0.72675300 -0.28263400  
1775 C -4.87154000 -1.69632600 -0.59060700  
1776 C 2.15288800 -3.00048500 0.16398000  
1777 C 2.73308800 -4.18815500 -0.28055300  
1778 C 3.52788600 -4.17948500 -1.43712600  
1779 C 3.15323800 -1.79715400 -1.67644400  
1780 C 3.73285000 -2.97055400 -2.12988600

1781 C 2.09438300 2.36978800 -0.54584700  
1782 C 2.92506600 3.47133000 -0.68396800  
1783 C 4.31600900 3.33803700 -0.52153100  
1784 C 4.00862000 0.97606000 -0.08688000  
1785 C 4.85451900 2.07919800 -0.21751500  
1786 H -0.70253500 -2.54796900 1.75093400  
1787 H -2.85170200 -1.67177800 2.56266000  
1788 H -2.34563000 -2.76525100 3.84632100  
1789 H -1.33503100 1.44598200 4.19984100  
1790 H -1.39298000 -0.85142900 5.12805000  
1791 H -3.06827400 -0.48957100 4.74705700  
1792 H 0.06721100 -2.28721700 3.34998400  
1793 H 2.81207100 0.65067800 2.87166300  
1794 H 2.40921500 -1.05780600 3.45786500  
1795 H 1.19173900 1.59276600 4.50366100  
1796 H -2.40895500 0.98112700 2.87496300  
1797 H 0.78683500 -0.11126500 5.09194400  
1798 H -1.94264700 5.07943800 0.88234700  
1799 H -2.94307200 1.31549600 -2.19025300  
1800 H -3.70067300 3.57200400 -2.74776300  
1801 H -1.09589200 -2.45059000 -1.09507500  
1802 H -2.79350700 -4.16623800 -1.66113700  
1803 H -5.92116700 -1.47240600 -0.44138100  
1804 H 2.56694500 -5.10322600 0.27556600  
1805 H 3.34156200 -0.87387800 -2.21600700  
1806 H 4.35557500 -2.98506200 -3.01858300  
1807 H 1.02351900 2.50228700 -0.67266500  
1808 H 2.52448500 4.45166600 -0.92158500  
1809 H 5.92219700 1.94547300 -0.08858100  
1810 H -0.85932200 -0.24395300 -2.76911700  
1811 H 0.34933200 1.06522800 -2.69879700  
1812 H 0.86202300 -0.64063400 -2.77180600  
1813 H 1.54017300 -3.02441000 1.06108300  
1814 H 4.45107700 0.00983300 0.13868000  
1815 H -1.16541800 2.79828900 1.45090300  
1816 H -4.25619800 0.23219200 0.09827000  
1817 O 4.13965600 -5.26211900 -1.96099100  
1818 O -5.29571200 -3.95043900 -1.42812500  
1819 O -3.23628900 5.76167900 -1.17272100  
1820 O 5.03654000 4.47137900 -0.67808100  
1821 C 3.98870300 -6.52456200 -1.31467400  
1822 H 4.56354200 -7.23182900 -1.91293500  
1823 H 4.38930700 -6.49844700 -0.29421200  
1824 H 2.93728300 -6.83531500 -1.29121300

1825 C -6.70043800 -3.76989900 -1.26492400  
1826 H -7.07000200 -2.94455400 -1.88553800  
1827 H -7.15761900 -4.70372600 -1.59320200  
1828 H -6.95830900 -3.58600500 -0.21495500  
1829 C -3.98342700 6.08547000 -2.34418000  
1830 H -4.16937000 7.15815200 -2.28670800  
1831 H -3.41297600 5.86144700 -3.25350800  
1832 H -4.93961900 5.54923300 -2.36558000  
1833 C 6.45336000 4.41268400 -0.53496100  
1834 H 6.90067700 3.73968300 -1.27656900  
1835 H 6.80952400 5.42900500 -0.70562700  
1836 H 6.73876900 4.09061700 0.47401200

1837  
1838 **2TS2**  
1839 N 0.06826100 -0.20991400 -0.84492600  
1840 P -1.39385000 -0.09466200 0.06492600  
1841 P 1.45254700 -0.08307000 0.19448900  
1842 Cr -0.26642700 -0.04272000 2.35590700  
1843 C -1.95415900 0.29918000 3.48943600  
1844 C -1.62425600 1.53394400 4.33450200  
1845 C 0.78150900 0.92250900 3.96753400  
1846 C -0.24945000 1.36051100 4.99793400  
1847 C 0.90396600 -1.39930400 3.93613100  
1848 C 0.12628600 -2.06491600 2.98951600  
1849 C 0.13859500 -0.24338400 -2.31404900  
1850 C -2.17519000 1.50110300 -0.35894800  
1851 C -2.52507800 -1.38290600 -0.54035100  
1852 C 2.43080200 -1.59261600 -0.14525200  
1853 C 2.48377200 1.29162600 -0.42246200  
1854 C -3.54836800 1.71885900 -0.11914100  
1855 C -4.11679400 2.96690900 -0.31953000  
1856 C -3.32810400 4.04466000 -0.76224800  
1857 C -1.39614700 2.58680900 -0.78318400  
1858 C -1.95893000 3.84684500 -0.99311800  
1859 O -3.98063000 5.21654300 -0.93291000  
1860 C -2.54840300 -2.62703400 0.12362900  
1861 C -3.35357800 -3.66174600 -0.32313600  
1862 C -4.17029800 -3.48287500 -1.45530300  
1863 C -3.34739000 -1.21654600 -1.66695800  
1864 C -4.16338400 -2.24935900 -2.12639700  
1865 O -4.92069600 -4.54763400 -1.80768200  
1866 C 1.80448600 -2.77902200 -0.55338300  
1867 C 2.52191100 -3.96835400 -0.69989600  
1868 C 3.89546800 -3.99124400 -0.41854500

1869 C 3.81070500 -1.63517900 0.14379700  
1870 C 4.53171200 -2.81155600 0.00885300  
1871 O 4.69020100 -5.08053200 -0.52527200  
1872 C 2.43087800 2.52938300 0.25150900  
1873 C 3.15382400 3.62463100 -0.19516700  
1874 C 3.96306900 3.51510300 -1.34034100  
1875 C 3.30114400 1.19727600 -1.56111500  
1876 C 4.03406200 2.28922300 -2.02243200  
1877 O 4.62958700 4.63430900 -1.69549700  
1878 C -3.24926100 6.35475100 -1.37881100  
1879 C -5.79231500 -4.44108100 -2.93179600  
1880 C 4.11801300 -6.31065400 -0.95969800  
1881 C 5.49044700 4.59667700 -2.83210100  
1882 H -2.84074800 0.44557300 2.86074800  
1883 H -1.60058700 2.43135700 3.69658300  
1884 H -2.39618200 1.72693200 5.09365100  
1885 H 1.79751200 0.83678100 4.35446100  
1886 H -0.31173000 0.61208900 5.80087100  
1887 H 0.07664000 2.29303600 5.48264900  
1888 H -2.12457200 -0.58185700 4.12360200  
1889 H 0.60912700 -2.51651800 2.12496600  
1890 H -0.84876200 -2.45534300 3.26898100  
1891 H 1.97659900 -1.32734400 3.79016400  
1892 H 0.83116800 1.65245900 3.12095800  
1893 H 0.55865800 -1.28899300 4.95808500  
1894 H -4.18086400 0.90262500 0.21796500  
1895 H -5.17387500 3.13806500 -0.14354600  
1896 H -0.33242500 2.45788300 -0.96055800  
1897 H -1.32782000 4.65877000 -1.33514500  
1898 H -1.93286500 -2.77952000 1.00567200  
1899 H -3.38279600 -4.61821300 0.18864500  
1900 H -3.36778800 -0.26491400 -2.18980300  
1901 H -4.78831500 -2.08543500 -2.99641300  
1902 H 0.74044100 -2.78162000 -0.77440800  
1903 H 2.00628300 -4.86110500 -1.03423100  
1904 H 4.32978900 -0.73655300 0.46556000  
1905 H 5.59524300 -2.84660400 0.22220900  
1906 H 1.81885800 2.63528400 1.14413100  
1907 H 3.12151600 4.57554900 0.32671300  
1908 H 3.38387000 0.25443800 -2.09365000  
1909 H 4.65530500 2.17807700 -2.90356400  
1910 H 0.25115700 0.75981400 -2.74030900  
1911 H 0.98643900 -0.85942900 -2.62706200  
1912 H -0.77234300 -0.69859500 -2.71257900

|      |              |             |             |             |
|------|--------------|-------------|-------------|-------------|
| 1913 | H            | -3.97541600 | 7.16563500  | -1.44312900 |
| 1914 | H            | -2.46133500 | 6.62654100  | -0.66556000 |
| 1915 | H            | -2.80675600 | 6.18172700  | -2.36753900 |
| 1916 | H            | -6.28798800 | -5.40880000 | -3.01210900 |
| 1917 | H            | -6.54352800 | -3.65717200 | -2.77837200 |
| 1918 | H            | -5.23107300 | -4.24035600 | -3.85230900 |
| 1919 | H            | 4.93718200  | -7.03027000 | -0.96980000 |
| 1920 | H            | 3.33914700  | -6.65436300 | -0.26785500 |
| 1921 | H            | 3.69921800  | -6.22030600 | -1.96955000 |
| 1922 | H            | 5.91618700  | 5.59721600  | -2.91188600 |
| 1923 | H            | 6.29664500  | 3.86614600  | -2.69526100 |
| 1924 | H            | 4.93178300  | 4.36314100  | -3.74648600 |
| 1925 |              |             |             |             |
| 1926 | <b>2INT3</b> |             |             |             |
| 1927 | N            | -0.06662900 | 0.22666400  | -0.87403000 |
| 1928 | P            | 1.08551100  | 1.01418500  | 0.16329600  |
| 1929 | P            | -1.13435200 | -0.80538800 | 0.00609500  |
| 1930 | Cr           | -0.18322400 | -0.12946500 | 2.23188900  |
| 1931 | C            | -1.53346300 | -0.10903300 | 3.72056200  |
| 1932 | C            | -0.40001400 | 0.44434900  | 4.56276400  |
| 1933 | C            | 0.54796900  | -1.88856400 | 5.23106500  |
| 1934 | C            | 0.16353900  | -0.46350800 | 5.66743100  |
| 1935 | C            | 0.75073000  | -1.89607700 | 2.65290800  |
| 1936 | C            | 1.47118200  | -1.96987300 | 3.99948300  |
| 1937 | C            | -0.08326500 | 0.37573600  | -2.33871600 |
| 1938 | C            | 2.75811700  | 0.66959000  | -0.47137800 |
| 1939 | C            | 0.81957600  | 2.80108100  | -0.12534000 |
| 1940 | C            | -2.83290000 | -0.40512400 | -0.50089100 |
| 1941 | C            | -0.82569900 | -2.51028600 | -0.55338200 |
| 1942 | C            | 3.27044000  | 1.24547400  | -1.64635900 |
| 1943 | C            | 4.54235100  | 0.92460500  | -2.11601000 |
| 1944 | C            | 5.33850600  | 0.01185400  | -1.40367800 |
| 1945 | C            | 3.57395600  | -0.23966600 | 0.23311200  |
| 1946 | C            | 4.84224900  | -0.56594000 | -0.22132800 |
| 1947 | O            | 6.58328600  | -0.36750800 | -1.76258900 |
| 1948 | C            | 1.85499600  | 3.73166500  | 0.09881000  |
| 1949 | C            | 1.62002800  | 5.09466200  | 0.00571900  |
| 1950 | C            | 0.33708000  | 5.57560300  | -0.31238000 |
| 1951 | C            | -0.45917000 | 3.29295900  | -0.42518400 |
| 1952 | C            | -0.70565600 | 4.66293500  | -0.52894300 |
| 1953 | O            | 0.21648800  | 6.92064400  | -0.38573000 |
| 1954 | C            | -3.56338200 | 0.53764800  | 0.25249700  |
| 1955 | C            | -4.83747500 | 0.92518700  | -0.12836300 |
| 1956 | C            | -5.42810300 | 0.37531900  | -1.28198700 |

|      |   |             |             |             |
|------|---|-------------|-------------|-------------|
| 1957 | C | -3.43598400 | -0.94979000 | -1.64656800 |
| 1958 | C | -4.71794800 | -0.56962500 | -2.04002200 |
| 1959 | O | -6.67156800 | 0.81356100  | -1.56728700 |
| 1960 | C | -1.78570400 | -3.52205300 | -0.34340900 |
| 1961 | C | -1.50657600 | -4.84226700 | -0.65924400 |
| 1962 | C | -0.25286300 | -5.19606500 | -1.19119300 |
| 1963 | C | 0.42591800  | -2.87667100 | -1.06662000 |
| 1964 | C | 0.71571100  | -4.20167800 | -1.39360500 |
| 1965 | O | -0.08458400 | -6.50754500 | -1.47047300 |
| 1966 | C | 7.16967400  | 0.19547800  | -2.93450800 |
| 1967 | C | -1.05377700 | 7.48246300  | -0.70164300 |
| 1968 | C | -7.34818300 | 0.28759500  | -2.70825000 |
| 1969 | C | 1.16264100  | -6.94541700 | -2.00285900 |
| 1970 | H | -2.34517200 | 0.60449400  | 3.54145900  |
| 1971 | H | 0.50475900  | 0.70112000  | 3.89826600  |
| 1972 | H | -0.63350300 | 1.43821700  | 4.96214500  |
| 1973 | H | -0.35550100 | -2.48131400 | 5.03552400  |
| 1974 | H | -0.58526500 | -0.52342300 | 6.46706400  |
| 1975 | H | 1.04397700  | 0.02826700  | 6.10196100  |
| 1976 | H | -1.92583500 | -1.07649300 | 4.03555900  |
| 1977 | H | 1.44224300  | -2.01913400 | 1.80745100  |
| 1978 | H | -0.03068500 | -2.66274400 | 2.57162600  |
| 1979 | H | 2.25529100  | -1.19931200 | 4.06793800  |
| 1980 | H | 1.04142200  | -2.36852900 | 6.08437700  |
| 1981 | H | 2.00823100  | -2.93061400 | 4.03828600  |
| 1982 | H | 2.67990000  | 1.96930500  | -2.20045500 |
| 1983 | H | 4.90645900  | 1.39016000  | -3.02441100 |
| 1984 | H | 3.21343500  | -0.68764700 | 1.15492400  |
| 1985 | H | 5.47725500  | -1.25785600 | 0.32235500  |
| 1986 | H | 2.85674300  | 3.38747900  | 0.33892400  |
| 1987 | H | 2.41545300  | 5.81436800  | 0.17020600  |
| 1988 | H | -1.28071900 | 2.60247000  | -0.59649500 |
| 1989 | H | -1.70313900 | 5.00473100  | -0.77947200 |
| 1990 | H | -3.13080900 | 0.96212600  | 1.15497200  |
| 1991 | H | -5.40830000 | 1.64249500  | 0.45232000  |
| 1992 | H | -2.90858400 | -1.69319000 | -2.23664600 |
| 1993 | H | -5.15378300 | -1.01303200 | -2.92746700 |
| 1994 | H | -2.76232900 | -3.27518500 | 0.06328400  |
| 1995 | H | -2.24269100 | -5.62479400 | -0.50640900 |
| 1996 | H | 1.19364900  | -2.12334800 | -1.21781300 |
| 1997 | H | 1.68999400  | -4.44677600 | -1.79993400 |
| 1998 | H | 0.63476000  | -0.29530800 | -2.82270700 |
| 1999 | H | -1.08479400 | 0.15847000  | -2.71996200 |
| 2000 | H | 0.15825400  | 1.40881200  | -2.60375900 |

|      |             |             |             |             |      |   |             |             |             |
|------|-------------|-------------|-------------|-------------|------|---|-------------|-------------|-------------|
| 2001 | H           | 8.16212700  | -0.24960800 | -3.00949900 | 2045 | C | -3.70249900 | 0.35463800  | -1.46412800 |
| 2002 | H           | 6.58825600  | -0.05500400 | -3.83003000 | 2046 | C | -4.76404600 | 1.17795900  | -1.83762600 |
| 2003 | H           | 7.26318100  | 1.28455600  | -2.84757800 | 2047 | O | -5.95545800 | 3.27282600  | -1.45264600 |
| 2004 | H           | -0.90656400 | 8.56288800  | -0.70413100 | 2048 | C | -3.05558500 | -2.53567500 | 0.05933800  |
| 2005 | H           | -1.39771000 | 7.15893600  | -1.69185600 | 2049 | C | -3.35295000 | -3.87618600 | -0.12802000 |
| 2006 | H           | -1.80492800 | 7.21834600  | 0.05295600  | 2050 | C | -2.41643400 | -4.73431100 | -0.73365500 |
| 2007 | H           | -8.32083400 | 0.77968300  | -2.72558800 | 2051 | C | -0.88429500 | -2.87251500 | -0.94017500 |
| 2008 | H           | -6.80529600 | 0.51761600  | -3.63285400 | 2052 | C | -1.17526900 | -4.22314900 | -1.13967600 |
| 2009 | H           | -7.48807300 | -0.79637900 | -2.62114200 | 2053 | O | -2.80834200 | -6.02027500 | -0.87650000 |
| 2010 | H           | 1.06233700  | -8.02224300 | -2.14162500 | 2054 | C | 6.46844400  | -2.95756200 | -3.02703400 |
| 2011 | H           | 1.37166100  | -6.47062400 | -2.96932600 | 2055 | C | 2.17408400  | 7.16320300  | -1.06245600 |
| 2012 | H           | 1.98555700  | -6.74203400 | -1.30673600 | 2056 | C | -6.89484100 | 2.95308200  | -2.47755200 |
| 2013 |             |             |             |             | 2057 | C | -1.91652000 | -6.95013700 | -1.48475600 |
| 2014 | <b>2TS3</b> |             |             |             | 2058 | H | -2.65287800 | 0.42488300  | 2.84961000  |
| 2015 | N           | -0.08039200 | 0.17636400  | -1.02593900 | 2059 | H | 0.39229700  | 0.39101400  | 3.69215500  |
| 2016 | P           | 1.29986300  | 0.43511700  | -0.02220200 | 2060 | H | -1.07464700 | 1.34325600  | 4.41898200  |
| 2017 | P           | -1.37175900 | -0.27657800 | 0.02673600  | 2061 | H | 0.72525600  | -2.15370500 | 4.51681000  |
| 2018 | Cr          | -0.06142600 | 0.05452300  | 2.11645400  | 2062 | H | -1.30544000 | -1.27988600 | 5.61527900  |
| 2019 | C           | -1.84150700 | -0.21961200 | 3.18041600  | 2063 | H | -0.41641200 | 0.09596800  | 6.25603600  |
| 2020 | C           | -0.91588100 | 0.28956900  | 4.17202500  | 2064 | H | -2.11341800 | -1.27634200 | 3.22593900  |
| 2021 | C           | 0.83540400  | -1.33155700 | 5.24223500  | 2065 | H | 2.42052200  | 0.90168600  | 3.06937300  |
| 2022 | C           | -0.49901000 | -0.57258100 | 5.39079300  | 2066 | H | 2.18684600  | -0.81584100 | 2.68034600  |
| 2023 | C           | 1.83938200  | 0.00856900  | 3.31747800  | 2067 | H | 2.00434700  | 0.47814600  | 5.44051600  |
| 2024 | C           | 1.98477700  | -0.41074800 | 4.79444000  | 2068 | H | 1.07548100  | -1.80222000 | 6.20221200  |
| 2025 | C           | -0.11440900 | 0.23523100  | -2.49337500 | 2069 | H | 2.94806600  | -0.91700000 | 4.93760400  |
| 2026 | C           | 2.65636800  | -0.62003400 | -0.62793500 | 2070 | H | 3.39413500  | 0.73379800  | -2.14272800 |
| 2027 | C           | 1.83656100  | 2.15412400  | -0.32615000 | 2071 | H | 5.11750300  | -0.78260200 | -2.98633000 |
| 2028 | C           | -2.82050700 | 0.72254900  | -0.43560000 | 2072 | H | 2.19826300  | -2.22054000 | 0.76343200  |
| 2029 | C           | -1.81585500 | -2.00477400 | -0.35447200 | 2073 | H | 3.95555600  | -3.74395300 | -0.08465400 |
| 2030 | C           | 3.49834300  | -0.24642000 | -1.68762300 | 2074 | H | 3.87740300  | 1.84835100  | 0.34966300  |
| 2031 | C           | 4.48477800  | -1.10582900 | -2.16806200 | 2075 | H | 4.51725100  | 4.22829600  | 0.15157000  |
| 2032 | C           | 4.64771900  | -2.37405600 | -1.58729500 | 2076 | H | -0.09941000 | 2.83692900  | -0.99882800 |
| 2033 | C           | 2.83373000  | -1.89814000 | -0.05764500 | 2077 | H | 0.55065500  | 5.18656300  | -1.21648800 |
| 2034 | C           | 3.80992000  | -2.76319600 | -0.52565600 | 2078 | H | -2.37404800 | 2.26442800  | 1.02230800  |
| 2035 | O           | 5.56931600  | -3.28338800 | -1.96843000 | 2079 | H | -4.26219400 | 3.72659000  | 0.36075200  |
| 2036 | C           | 3.14149300  | 2.57173300  | 0.01014100  | 2080 | H | -3.57226700 | -0.59351800 | -1.97701400 |
| 2037 | C           | 3.51275100  | 3.90264400  | -0.09866300 | 2081 | H | -5.42732400 | 0.86048400  | -2.63357100 |
| 2038 | C           | 2.58792700  | 4.86492700  | -0.54378100 | 2082 | H | -3.79884800 | -1.89265600 | 0.52246000  |
| 2039 | C           | 0.91825000  | 3.12489700  | -0.75026900 | 2083 | H | -4.30765400 | -4.28921900 | 0.18124900  |
| 2040 | C           | 1.28319400  | 4.46678700  | -0.87013900 | 2084 | H | 0.08648100  | -2.49835300 | -1.25135400 |
| 2041 | O           | 3.05271400  | 6.13204400  | -0.62124500 | 2085 | H | -0.43587800 | -4.86131800 | -1.60921700 |
| 2042 | C           | -3.03620000 | 1.95412400  | 0.21749900  | 2086 | H | 0.17326700  | -0.71966500 | -2.94726900 |
| 2043 | C           | -4.08632900 | 2.78213200  | -0.14391500 | 2087 | H | -1.12466500 | 0.49450300  | -2.82404300 |
| 2044 | C           | -4.96260500 | 2.40116700  | -1.17776200 | 2088 | H | 0.56694700  | 1.01455700  | -2.84627500 |



2089 H 7.11197300 -3.82967800 -3.14491100  
2090 H 5.92888100 -2.77212400 -3.96351300  
2091 H 7.07996600 -2.08350500 -2.77338100  
2092 H 2.76285200 8.08076300 -1.04361100  
2093 H 1.82210800 6.97619700 -2.08442600  
2094 H 1.31372200 7.26784500 -0.39008700  
2095 H -7.59079800 3.79163000 -2.51031200  
2096 H -6.40044800 2.84979500 -3.45094600  
2097 H -7.44202100 2.03272900 -2.24113700  
2098 H -2.44437800 -7.90421300 -1.49121400  
2099 H -1.67809100 -6.65803700 -2.51486100  
2100 H -0.98969200 -7.05000200 -0.90655500  
2101

2102 **2SC2**

2103 N -0.17798800 0.21980000 -0.97603300  
2104 P 1.20080700 0.62413000 -0.01523800  
2105 P -1.37518100 -0.41620200 0.10074400  
2106 Cr -0.02961700 -0.06708100 2.08982500  
2107 C -1.77834200 -0.68672300 3.23394500  
2108 C -0.68406800 -0.45882300 4.08222600  
2109 C 1.61569200 -1.65132500 4.51598700  
2110 C 0.08957700 -1.58669800 4.75205700  
2111 C 2.38074300 0.66150600 3.68847600  
2112 C 2.39835500 -0.36271200 4.82876700  
2113 C -0.26994400 0.32706600 -2.43794400  
2114 C 2.65108500 -0.25437700 -0.68167900  
2115 C 1.51713600 2.39810700 -0.31730800  
2116 C -2.93488600 0.44756200 -0.26158000  
2117 C -1.64332100 -2.16075100 -0.36330700  
2118 C 3.33874700 0.15751800 -1.83517700  
2119 C 4.40520000 -0.58011000 -2.34623100  
2120 C 4.80897200 -1.76075800 -1.70092000  
2121 C 3.07249400 -1.44132200 -0.04694900  
2122 C 4.13153200 -2.18488400 -0.54310000  
2123 O 5.82692100 -2.55021500 -2.10375700  
2124 C 2.79619500 2.95508800 -0.11162400  
2125 C 3.00275000 4.32178100 -0.21706300  
2126 C 1.93340500 5.18076100 -0.52915400  
2127 C 0.45603300 3.26577400 -0.61359800  
2128 C 0.65365900 4.64244500 -0.72912900  
2129 O 2.24229400 6.49434100 -0.61325400  
2130 C -3.25681600 1.60549100 0.47660700  
2131 C -4.39776600 2.33945700 0.19595400  
2132 C -5.26183000 1.93359200 -0.83865100

2133 C -3.80608000 0.05323400 -1.28939800  
2134 C -4.95871200 0.78163300 -1.58155800  
2135 O -6.34827100 2.71099700 -1.03160700  
2136 C -2.82268900 -2.83696500 0.01388200  
2137 C -2.97483400 -4.19285100 -0.23034400  
2138 C -1.94766500 -4.92217700 -0.85666800  
2139 C -0.62017800 -2.90170500 -0.97101600  
2140 C -0.76430100 -4.26640900 -1.22651300  
2141 O -2.19883300 -6.23600300 -1.05439400  
2142 C 6.57867800 -2.17922500 -3.25796900  
2143 C 1.21044500 7.42692200 -0.92271200  
2144 C -7.28193500 2.35601500 -2.04996100  
2145 C -1.20470300 -7.04071500 -1.68164100  
2146 H -2.56326100 0.05882600 3.12355100  
2147 H 1.35937200 1.04208500 3.49188300  
2148 H -0.64368600 0.50946900 4.58961700  
2149 H 1.81980000 -1.94740700 3.47171100  
2150 H -0.34512200 -2.54551700 4.44091000  
2151 H -0.08158600 -1.51452400 5.83628200  
2152 H -2.07730600 -1.70562000 2.98990500  
2153 H 2.97145000 1.55504600 3.91858800  
2154 H 2.79231900 0.23054700 2.76764400  
2155 H 2.01280600 0.09246300 5.75066400  
2156 H 2.00809200 -2.47134300 5.12979100  
2157 H 3.44553100 -0.61876100 5.03082600  
2158 H 3.05099000 1.07472800 -2.34073000  
2159 H 4.91435700 -0.23118100 -3.23701600  
2160 H 2.56500000 -1.78654800 0.85135500  
2161 H 4.46402400 -3.09437300 -0.05332500  
2162 H 3.64103500 2.31396900 0.12280800  
2163 H 3.98640300 4.75490300 -0.06685600  
2164 H -0.54351100 2.86785000 -0.76564700  
2165 H -0.18756300 5.28048800 -0.97370900  
2166 H -2.60581200 1.93017400 1.28503000  
2167 H -4.65525300 3.22609300 0.76625600  
2168 H -3.59527100 -0.84259400 -1.86581700  
2169 H -5.61056200 0.44552200 -2.37927700  
2170 H -3.63417900 -2.29662300 0.49294600  
2171 H -3.88300400 -4.71627200 0.05066700  
2172 H 0.30839900 -2.41535600 -1.25589900  
2173 H 0.04302300 -4.80347900 -1.71066500  
2174 H 0.15100300 -0.55202400 -2.93902200  
2175 H -1.31903100 0.43270600 -2.72909400  
2176 H 0.26489800 1.21929800 -2.77676600

|      |           |             |             |             |      |   |             |             |             |
|------|-----------|-------------|-------------|-------------|------|---|-------------|-------------|-------------|
| 2177 | H         | 7.33636400  | -2.95410300 | -3.37675200 | 2221 | C | 4.09177200  | -0.67224300 | -0.75810900 |
| 2178 | H         | 5.94466500  | -2.14786200 | -4.15220100 | 2222 | C | 5.11122900  | -1.59513600 | -0.98908900 |
| 2179 | H         | 7.06795400  | -1.20805200 | -3.11747700 | 2223 | O | 6.04693000  | -3.78302300 | -0.44334300 |
| 2180 | H         | 1.69053600  | 8.40587500  | -0.93236800 | 2224 | C | 3.56914300  | 2.25370800  | 0.71039400  |
| 2181 | H         | 0.77355600  | 7.22501100  | -1.90841800 | 2225 | C | 4.01659600  | 3.56234300  | 0.61293200  |
| 2182 | H         | 0.42146100  | 7.41475900  | -0.16079400 | 2226 | C | 3.22615300  | 4.53848300  | -0.01973200 |
| 2183 | H         | -8.06239100 | 3.11628800  | -2.01129300 | 2227 | C | 1.53459800  | 2.85815400  | -0.43506700 |
| 2184 | H         | -6.81154400 | 2.36481800  | -3.04055500 | 2228 | C | 1.97688800  | 4.17790800  | -0.54433800 |
| 2185 | H         | -7.72200100 | 1.37007300  | -1.85862200 | 2229 | O | 3.75726700  | 5.78243700  | -0.06807000 |
| 2186 | H         | -1.62675100 | -8.04479200 | -1.73324200 | 2230 | C | -4.93076600 | 3.95472200  | -4.05520200 |
| 2187 | H         | -0.98533500 | -6.68435400 | -2.69563800 | 2231 | C | -2.22796400 | -6.76144700 | -2.15584100 |
| 2188 | H         | -0.28018500 | -7.06327300 | -1.09156200 | 2232 | C | 7.13301700  | -3.56711900 | -1.34197700 |
| 2189 |           |             |             |             | 2233 | C | 3.01464700  | 6.82328700  | -0.69469200 |
| 2190 | <b>2P</b> |             |             |             | 2234 | H | 0.68613900  | -1.20095000 | 4.56143500  |
| 2191 | N         | 0.50528500  | -0.09578200 | -0.81200100 | 2235 | H | -3.82571700 | -1.96831100 | 4.49922100  |
| 2192 | P         | -1.10743300 | -0.27439800 | -0.20425800 | 2236 | H | -1.73157000 | -1.41196100 | 4.26224100  |
| 2193 | P         | 1.65748100  | 0.19005700  | 0.45355700  | 2237 | H | -3.09755000 | 0.74404800  | 2.67627300  |
| 2194 | Cr        | -0.21753300 | -0.13921200 | 2.24631200  | 2238 | H | -1.70996000 | 1.64249100  | 4.75903300  |
| 2195 | C         | 0.05159500  | -0.31568500 | 4.54765800  | 2239 | H | -2.68812200 | 0.53698700  | 5.70364900  |
| 2196 | C         | -1.30628300 | -0.42046400 | 4.41876900  | 2240 | H | 0.51982300  | 0.62097800  | 4.84916000  |
| 2197 | C         | -3.45669300 | 0.87544200  | 3.70915400  | 2241 | H | -5.43187000 | -2.06009700 | 3.78825000  |
| 2198 | C         | -2.27633400 | 0.70428800  | 4.69556200  | 2242 | H | -4.03648600 | -1.74136000 | 2.75043100  |
| 2199 | C         | -4.47572700 | -1.52871300 | 3.73397200  | 2243 | H | -5.06282600 | 0.15354200  | 4.95903300  |
| 2200 | C         | -4.68425600 | -0.02332600 | 3.94276100  | 2244 | H | -3.79026100 | 1.91828000  | 3.78051100  |
| 2201 | C         | 0.83078900  | -0.06225100 | -2.24739800 | 2245 | H | -5.47646200 | 0.31823300  | 3.26411800  |
| 2202 | C         | -2.15736300 | 0.96883600  | -1.02990600 | 2246 | H | -2.43270800 | -0.07999300 | -2.90050500 |
| 2203 | C         | -1.68081800 | -1.89016300 | -0.84319200 | 2247 | H | -3.74430400 | 1.68781300  | -3.96524100 |
| 2204 | C         | 3.05662700  | -0.93892700 | 0.15286000  | 2248 | H | -2.11826200 | 2.29114400  | 0.68650900  |
| 2205 | C         | 2.32126400  | 1.87213100  | 0.17584600  | 2249 | H | -3.45743600 | 4.07587100  | -0.39453700 |
| 2206 | C         | -2.63576900 | 0.82940700  | -2.34276800 | 2250 | H | -3.79208500 | -1.38891700 | -0.80243500 |
| 2207 | C         | -3.38930100 | 1.83165200  | -2.95147000 | 2251 | H | -4.55375300 | -3.65663600 | -1.42941100 |
| 2208 | C         | -3.68168800 | 3.00993300  | -2.24524200 | 2252 | H | 0.29659300  | -2.75067200 | -0.95992900 |
| 2209 | C         | -2.46509600 | 2.15697200  | -0.33572100 | 2253 | H | -0.46501400 | -4.98697900 | -1.60216000 |
| 2210 | C         | -3.21217800 | 3.16326600  | -0.92809300 | 2254 | H | 2.29883500  | -2.40105100 | 1.56161900  |
| 2211 | O         | -4.40267500 | 4.04243800  | -2.73336700 | 2255 | H | 4.10902100  | -4.04448700 | 1.14970000  |
| 2212 | C         | -3.05679400 | -2.17075800 | -0.97035200 | 2256 | H | 4.11753700  | 0.27585600  | -1.28701900 |
| 2213 | C         | -3.49614800 | -3.43774600 | -1.32278400 | 2257 | H | 5.89575900  | -1.35369800 | -1.69663300 |
| 2214 | C         | -2.57149700 | -4.47126000 | -1.55715900 | 2258 | H | 4.20216200  | 1.51894900  | 1.20006100  |
| 2215 | C         | -0.76971000 | -2.93260600 | -1.06306300 | 2259 | H | 4.97966000  | 3.85866800  | 1.01604800  |
| 2216 | C         | -1.20000500 | -4.21035700 | -1.42531000 | 2260 | H | 0.55916200  | 2.60299500  | -0.83948000 |
| 2217 | O         | -3.10312500 | -5.66705800 | -1.90141200 | 2261 | H | 1.34631400  | 4.90918600  | -1.03653600 |
| 2218 | C         | 3.07882000  | -2.17091600 | 0.83879700  | 2262 | H | 0.72445500  | 0.94421100  | -2.66712800 |
| 2219 | C         | 4.08399100  | -3.09864800 | 0.61824600  | 2263 | H | 1.85899100  | -0.40270000 | -2.39835000 |
| 2220 | C         | 5.11188900  | -2.81915000 | -0.30123700 | 2264 | H | 0.17013600  | -0.74508900 | -2.78879400 |

2265 H -5.47085800 4.88762300 -4.21879400  
2266 H -4.12960600 3.86122600 -4.79827000  
2267 H -5.62330200 3.10991700 -4.15097600  
2268 H -2.87309900 -7.60257900 -2.41161700  
2269 H -1.55648100 -6.54798100 -2.99669800  
2270 H -1.63554300 -7.01327100 -1.26748600  
2271 H 7.74812600 -4.46528400 -1.28128100  
2272 H 6.77758900 -3.43648300 -2.37123000  
2273 H 7.72809600 -2.69573900 -1.04356400  
2274 H 3.63360100 7.71754400 -0.61486800  
2275 H 2.83051500 6.60054200 -1.75303500  
2276 H 2.05888800 6.99474400 -0.18400000  
2277

2278 **2INT4**

2279 N 0.18686800 -0.06533000 -0.99884900  
2280 P 1.48916600 -0.38561900 0.10988000  
2281 P -1.27780600 0.29158600 -0.16202300  
2282 Cr -0.43671500 -0.28883700 2.11316500  
2283 C 0.34703100 0.08598600 -2.45416700  
2284 C 2.39800300 -1.83039000 -0.53996500  
2285 C 2.66708200 1.00675600 -0.10145800  
2286 C -2.53995600 -0.80790600 -0.88329900  
2287 C -1.81503200 1.97972300 -0.59516000  
2288 C 2.22791800 -3.08103400 0.08884600  
2289 C 2.86675100 -4.21726700 -0.38273900  
2290 C 3.70454300 -4.13987600 -1.50957000  
2291 C 3.25212300 -1.76663800 -1.65470000  
2292 C 3.89761900 -2.90138900 -2.14320800  
2293 O 4.27888900 -5.29996000 -1.89343000  
2294 C 2.21037800 2.29236200 -0.45573700  
2295 C 3.07672000 3.37598900 -0.49351300  
2296 C 4.43346300 3.21314300 -0.16230900  
2297 C 4.02173900 0.86059400 0.23437800  
2298 C 4.90211500 1.94360500 0.20600900  
2299 O 5.19366400 4.33040600 -0.23068300  
2300 C -2.17714400 -2.06126900 -1.41490500  
2301 C -3.14112300 -2.94671600 -1.87090600  
2302 C -4.50572500 -2.61483000 -1.78990200  
2303 C -3.90373600 -0.48910700 -0.80194900  
2304 C -4.88315100 -1.37712800 -1.24786400  
2305 O -5.36467900 -3.54788000 -2.25852000  
2306 C -1.58898900 3.03067700 0.31672100  
2307 C -1.92838600 4.33802100 0.00586700  
2308 C -2.50890700 4.63885500 -1.23967100

2309 C -2.40293800 2.29446100 -1.83173700  
2310 C -2.74635400 3.60450000 -2.15988500  
2311 O -2.80328200 5.93927700 -1.44919700  
2312 C 5.14772000 -5.30251600 -3.02408900  
2313 C 6.57919500 4.24031900 0.08874400  
2314 C -6.76446700 -3.28716900 -2.20121000  
2315 C -3.40672300 6.32396500 -2.68305300  
2316 H 1.59434600 -3.16270500 0.96668500  
2317 H 2.74209400 -5.17927900 0.10368700  
2318 H 3.43710300 -0.81438900 -2.14283900  
2319 H 4.54827900 -2.81253000 -3.00532000  
2320 H 1.16659200 2.44817000 -0.71306400  
2321 H 2.72979800 4.36339600 -0.78126500  
2322 H 4.41207800 -0.11476200 0.51189600  
2323 H 5.94274400 1.78687000 0.46504200  
2324 H -1.12927500 -2.33939300 -1.47812700  
2325 H -2.86756800 -3.90769000 -2.29457200  
2326 H -4.21834900 0.46663900 -0.39281200  
2327 H -5.92688000 -1.09555400 -1.17306400  
2328 H -1.15060300 2.81750800 1.28710200  
2329 H -1.76460200 5.14827000 0.70894600  
2330 H -2.61224100 1.50747900 -2.55000100  
2331 H -3.19863400 3.80952300 -3.12311100  
2332 H -0.60945900 -0.10165600 -2.94905900  
2333 H 0.69871800 1.08761300 -2.72620300  
2334 H 1.06233600 -0.65469000 -2.82200800  
2335 H 5.47998400 -6.33474200 -3.13742500  
2336 H 4.61968300 -4.98683700 -3.93194900  
2337 H 6.01723600 -4.65501300 -2.85866400  
2338 H 6.97737600 5.24768500 -0.03661900  
2339 H 6.72903200 3.91531200 1.12570500  
2340 H 7.10092300 3.55475300 -0.59028600  
2341 H -7.24643200 -4.16911000 -2.62413800  
2342 H -7.10142300 -3.14757200 -1.16678000  
2343 H -7.03003800 -2.40526600 -2.79694400  
2344 H -3.54896400 7.40286200 -2.61689100  
2345 H -2.75428100 6.09277400 -3.53362800  
2346 H -4.37864500 5.83479200 -2.81907200  
2347 C -1.02136200 -2.22948100 1.99213900  
2348 C -0.38236300 -2.40299300 3.34894400  
2349 C -1.31695900 -2.68659800 4.53774000  
2350 C -2.53712300 -1.75700500 4.66918600  
2351 C -2.24044900 -0.24668900 4.59361100  
2352 C -2.09603800 0.30920500 3.16768400

|      |             |             |             |             |      |   |             |             |             |
|------|-------------|-------------|-------------|-------------|------|---|-------------|-------------|-------------|
| 2353 | H           | -2.10572300 | -2.32824100 | 1.96403800  | 2397 | C | -3.45890300 | -2.16613100 | -2.03820700 |
| 2354 | H           | -0.55384400 | -2.78764900 | 1.18041400  | 2398 | C | -4.74657500 | -1.59880500 | -2.06138200 |
| 2355 | H           | 0.43990900  | -3.12880400 | 3.32349900  | 2399 | C | -3.87590000 | 0.35297400  | -0.92345900 |
| 2356 | H           | 0.18696200  | -1.45208900 | 3.64053400  | 2400 | C | -4.94970300 | -0.33283100 | -1.49440700 |
| 2357 | H           | -1.66585500 | -3.72357600 | 4.45428100  | 2401 | O | -5.70704300 | -2.34963200 | -2.64553000 |
| 2358 | H           | -0.72337400 | -2.63384800 | 5.46047100  | 2402 | C | 2.70084200  | 2.18153700  | 0.55170400  |
| 2359 | H           | -3.01298700 | -1.98347200 | 5.63108100  | 2403 | C | 3.67825000  | 3.15584200  | 0.43623900  |
| 2360 | H           | -3.28341200 | -2.00631900 | 3.90292600  | 2404 | C | 4.84441800  | 2.90255100  | -0.30994900 |
| 2361 | H           | -3.06673500 | 0.28293700  | 5.09160400  | 2405 | C | 4.00481900  | 0.69145100  | -0.82587800 |
| 2362 | H           | -1.34813100 | -0.01513700 | 5.19796600  | 2406 | C | 5.00183500  | 1.66095400  | -0.94275600 |
| 2363 | H           | -2.97942300 | 0.04111600  | 2.57157600  | 2407 | O | 5.74123600  | 3.91265200  | -0.35390600 |
| 2364 | H           | -2.04602700 | 1.40893200  | 3.18922900  | 2408 | C | 3.22486600  | -2.47776600 | 0.04556800  |
| 2365 | C           | 1.46368600  | 0.84140100  | 3.79581000  | 2409 | C | 3.70167200  | -3.70577000 | -0.38673100 |
| 2366 | C           | 0.90507900  | 1.87199100  | 3.13865800  | 2410 | C | 3.10687900  | -4.35043100 | -1.48734000 |
| 2367 | H           | 2.32127500  | 0.30895900  | 3.39102300  | 2411 | C | 1.55772100  | -2.50007200 | -1.69294000 |
| 2368 | H           | 1.12573300  | 0.54802800  | 4.78654300  | 2412 | C | 2.02787300  | -3.73844800 | -2.13919800 |
| 2369 | H           | 1.29834700  | 2.21431700  | 2.18432600  | 2413 | O | 3.64461500  | -5.54378500 | -1.82914800 |
| 2370 | H           | 0.09284600  | 2.44422400  | 3.57799600  | 2414 | C | -2.48470900 | 7.22923800  | -1.33889600 |
| 2371 |             |             |             |             | 2415 | C | -7.03989000 | -1.84663100 | -2.69501400 |
| 2372 | <b>2TS4</b> |             |             |             | 2416 | C | 6.94953200  | 3.73138800  | -1.08779600 |
| 2373 | N           | 0.20987600  | 0.22726300  | -0.94366100 | 2417 | C | 3.09825200  | -6.25192100 | -2.93806500 |
| 2374 | P           | -1.20539200 | 0.60601500  | -0.01835600 | 2418 | H | 1.66649400  | -2.12135000 | 2.84274800  |
| 2375 | P           | 1.48759800  | -0.28919200 | 0.10936900  | 2419 | H | -0.72633400 | -2.38819100 | 1.35970200  |
| 2376 | Cr          | -0.39352900 | -0.53333800 | 2.12351800  | 2420 | H | 0.48292700  | -3.57849200 | 1.59464200  |
| 2377 | C           | 0.62924500  | -2.16829500 | 3.17688700  | 2421 | H | -1.46308200 | -4.74123600 | 2.14128300  |
| 2378 | C           | -0.22882300 | -2.98226900 | 2.17789200  | 2422 | H | -2.40892800 | 0.26018500  | 3.54376900  |
| 2379 | C           | -1.31422400 | -3.87883900 | 2.80271000  | 2423 | H | -2.98502300 | -0.60581900 | 2.11709100  |
| 2380 | C           | -2.28540800 | -0.66461300 | 2.96382100  | 2424 | H | -1.96635900 | -1.97733800 | 4.68568100  |
| 2381 | C           | -2.64278100 | -1.88510200 | 3.82256500  | 2425 | H | -3.64128400 | -1.72157100 | 4.25570500  |
| 2382 | C           | -2.67758200 | -3.21505700 | 3.04921700  | 2426 | H | -3.30185600 | -3.93691800 | 3.58994400  |
| 2383 | C           | 0.60879000  | -0.37674000 | 4.24536000  | 2427 | H | -3.17695300 | -3.04593700 | 2.08380900  |
| 2384 | C           | 0.35737000  | 0.82073300  | 3.51202900  | 2428 | H | -0.92368900 | -4.28416700 | 3.74543100  |
| 2385 | C           | 0.43077800  | 0.72957600  | -2.31092400 | 2429 | H | 0.58181600  | -2.64967700 | 4.15087500  |
| 2386 | C           | -1.52559500 | 2.39529100  | -0.12641200 | 2430 | H | 1.63454000  | -0.62694500 | 4.49836500  |
| 2387 | C           | -2.58546300 | -0.19553700 | -0.90644800 | 2431 | H | -0.11647800 | -0.66825800 | 4.99852100  |
| 2388 | C           | 2.84198000  | 0.92647300  | -0.07876100 | 2432 | H | 1.21584400  | 1.35467600  | 3.10918900  |
| 2389 | C           | 2.14516500  | -1.84284800 | -0.60566000 | 2433 | H | -0.47855000 | 1.44154000  | 3.82447700  |
| 2390 | C           | -1.28211000 | 3.20189800  | 1.00357300  | 2434 | H | -0.95554200 | 2.74270600  | 1.93159900  |
| 2391 | C           | -1.46320800 | 4.57529600  | 0.95704300  | 2435 | H | -1.28639700 | 5.19917700  | 1.82719000  |
| 2392 | C           | -1.89284400 | 5.19091200  | -0.23228500 | 2436 | H | -2.17709700 | 2.43056800  | -2.19016700 |
| 2393 | C           | -1.96091100 | 3.02299400  | -1.30600300 | 2437 | H | -2.47900000 | 4.85372700  | -2.29488800 |
| 2394 | C           | -2.14230000 | 4.40328400  | -1.36850600 | 2438 | H | -1.41994100 | -1.94023400 | -1.44472700 |
| 2395 | O           | -2.03943100 | 6.53159900  | -0.17750500 | 2439 | H | -3.31987500 | -3.14814100 | -2.47910900 |
| 2396 | C           | -2.40306900 | -1.47893500 | -1.46121400 | 2440 | H | -4.05818600 | 1.33264200  | -0.49284200 |

2441 H -5.93101900 0.12692600 -1.49302000  
2442 H 1.80519400 2.40630200 1.12476600  
2443 H 3.57137700 4.12342200 0.91595700  
2444 H 4.14669200 -0.26129100 -1.32576600  
2445 H 5.88792500 1.44156700 -1.52692200  
2446 H 3.71045200 -1.99873600 0.89313400  
2447 H 4.53662900 -4.19151500 0.10803000  
2448 H 0.72003500 -2.04756800 -2.21355900  
2449 H 1.55120300 -4.20967600 -2.99087500  
2450 H 1.31876700 0.25612200 -2.73605200  
2451 H -0.42950500 0.47781100 -2.93979200  
2452 H 0.57836000 1.81539700 -2.32098500  
2453 H -2.52905100 8.28005100 -1.05165200  
2454 H -1.78036200 7.10724100 -2.17057500  
2455 H -3.48190300 6.89233100 -1.64661400  
2456 H -7.62615900 -2.61414700 -3.20110800  
2457 H -7.44181100 -1.68498800 -1.68742500  
2458 H -7.09143800 -0.91183500 -3.26638200  
2459 H 7.50522100 4.66282600 -0.97558000  
2460 H 7.54109000 2.90197400 -0.68160700  
2461 H 6.74652400 3.55309300 -2.15081800  
2462 H 3.68610700 -7.16631200 -3.02326900  
2463 H 2.04568000 -6.50957300 -2.76680000  
2464 H 3.18867700 -5.67224400 -3.86491400  
2465

2466 **2INT5**

2467 N -0.09879900 -0.05940500 -1.08807700  
2468 P 1.23723300 -0.69042300 -0.16796000  
2469 P -1.31026800 0.62876300 -0.07735700  
2470 Cr -0.22945100 -0.12143300 2.06713500  
2471 C -0.14143600 -0.04462700 -2.56048000  
2472 C 1.31314300 -2.46458300 -0.61489000  
2473 C 2.75597000 0.04307500 -0.86147600  
2474 C -2.91599200 -0.01070700 -0.64177800  
2475 C -1.34514400 2.42365300 -0.37923400  
2476 C 2.50247900 -3.19872000 -0.42532200  
2477 C 2.53380400 -4.56978400 -0.62694000  
2478 C 1.37189700 -5.25754800 -1.02204200  
2479 C 0.15818200 -3.16359200 -0.99248400  
2480 C 0.17908700 -4.54374100 -1.20496400  
2481 O 1.51152600 -6.59161300 -1.19764700  
2482 C 3.32787500 1.15374500 -0.20667600  
2483 C 4.45392000 1.78282500 -0.71431500  
2484 C 5.04984800 1.31573400 -1.89987800

2485 C 3.36303600 -0.41387500 -2.04261200  
2486 C 4.49630200 0.20835200 -2.56330700  
2487 O 6.14380800 1.99234300 -2.31078300  
2488 C -3.38600300 -1.23534700 -0.12174600  
2489 C -4.57176800 -1.79382900 -0.56806100  
2490 C -5.33468300 -1.13983300 -1.55421800  
2491 C -3.68642300 0.63111900 -1.62509800  
2492 C -4.88328500 0.08047200 -2.08134100  
2493 O -6.47501000 -1.76199800 -1.91757000  
2494 C -2.43720800 3.19999400 0.06276800  
2495 C -2.42439700 4.57952800 -0.06367000  
2496 C -1.31343900 5.23096000 -0.63166700  
2497 C -0.23636500 3.08361800 -0.92560000  
2498 C -0.21513800 4.47240400 -1.06262600  
2499 O -1.40443400 6.57646500 -0.71481600  
2500 C 0.37826800 -7.35553700 -1.59856300  
2501 C 6.81864000 1.56661400 -3.49282700  
2502 C -7.31438600 -1.15527700 -2.89901100  
2503 C -0.31691700 7.30916800 -1.27284200  
2504 H 3.41609100 -2.69190500 -0.12710800  
2505 H 3.44860300 -5.13734900 -0.48980300  
2506 H -0.77682400 -2.62921500 -1.13731600  
2507 H -0.73030600 -5.04673500 -1.51265500  
2508 H 2.88804800 1.52387400 0.71505100  
2509 H 4.90305900 2.63224500 -0.20987200  
2510 H 2.95830900 -1.27732900 -2.56207300  
2511 H 4.94027600 -0.17338000 -3.47524000  
2512 H -2.81973200 -1.75261200 0.64747200  
2513 H -4.94252300 -2.73059800 -0.16489000  
2514 H -3.35873700 1.57997200 -2.03826800  
2515 H -5.45324300 0.60491500 -2.83918000  
2516 H -3.30846200 2.72143500 0.50154500  
2517 H -3.26322100 5.18270400 0.26812700  
2518 H 0.62935200 2.51505600 -1.25200400  
2519 H 0.65360100 4.94850200 -1.50187400  
2520 H 0.46376200 0.76916200 -2.97445300  
2521 H 0.23160000 -0.99674700 -2.94859700  
2522 H -1.17485600 0.07460200 -2.89688900  
2523 H 0.72810400 -8.38550900 -1.67476200  
2524 H -0.42527900 -7.29747200 -0.85392300  
2525 H 0.00000100 -7.02569200 -2.57405400  
2526 H 7.66001000 2.24948400 -3.61335200  
2527 H 7.19236800 0.54094700 -3.38915900  
2528 H 6.16455900 1.63425900 -4.37054500

|      |             |             |             |             |      |   |             |             |             |
|------|-------------|-------------|-------------|-------------|------|---|-------------|-------------|-------------|
| 2529 | H           | -8.16300400 | -1.82939600 | -3.01700200 | 2573 | C | 2.47570100  | -1.18449000 | -1.56012200 |
| 2530 | H           | -7.67046400 | -0.17391100 | -2.56392700 | 2574 | C | 3.62997900  | -1.81108400 | -2.03189400 |
| 2531 | H           | -6.79295900 | -1.05220300 | -3.85815400 | 2575 | O | 6.05796500  | -1.70229500 | -2.27694100 |
| 2532 | H           | -0.61644800 | 8.35682400  | -1.23390300 | 2576 | C | 0.53216700  | 3.47099900  | 0.42153600  |
| 2533 | H           | 0.59937900  | 7.16926800  | -0.68639100 | 2577 | C | 0.53976400  | 4.84125400  | 0.21365000  |
| 2534 | H           | -0.13530600 | 7.01976100  | -2.31513700 | 2578 | C | 1.17171300  | 5.37873600  | -0.92273200 |
| 2535 | C           | -1.86415100 | -0.40829300 | 3.23201700  | 2579 | C | 1.77514700  | 3.14103800  | -1.62091000 |
| 2536 | C           | -1.53511500 | -0.49468700 | 4.72876800  | 2580 | C | 1.79096200  | 4.51687500  | -1.84279700 |
| 2537 | C           | -0.53881000 | -1.61415300 | 5.07231100  | 2581 | O | 1.12946300  | 6.72322400  | -1.03420700 |
| 2538 | C           | 0.87169500  | -1.51410500 | 4.46034200  | 2582 | C | -0.97328400 | -3.33070200 | -0.27372300 |
| 2539 | C           | 1.88242700  | -0.56761400 | 5.13002600  | 2583 | C | -1.18212500 | -4.59247100 | -0.80615700 |
| 2540 | C           | 1.69558200  | 0.95534600  | 5.00146600  | 2584 | C | -2.18858200 | -4.79540600 | -1.76902100 |
| 2541 | C           | 1.82408500  | 1.53593700  | 3.57561200  | 2585 | C | -2.75619100 | -2.44608500 | -1.64058800 |
| 2542 | C           | 0.54327900  | 1.63709000  | 2.74153200  | 2586 | C | -2.97751500 | -3.71094500 | -2.18433100 |
| 2543 | H           | -2.61861500 | 0.36284000  | 3.03141400  | 2587 | O | -2.31592500 | -6.06008100 | -2.22292000 |
| 2544 | H           | -2.27579300 | -1.37178000 | 2.87582600  | 2588 | C | -4.13366600 | -0.23548600 | 0.41212000  |
| 2545 | H           | -1.16619400 | 0.47290200  | 5.08771200  | 2589 | C | -5.29764600 | 0.51071800  | 0.51017200  |
| 2546 | H           | -2.45981600 | -0.68410200 | 5.29539300  | 2590 | C | -5.29795200 | 1.87587700  | 0.16996800  |
| 2547 | H           | -0.42359300 | -1.68496800 | 6.16204700  | 2591 | C | -2.94026800 | 1.71789000  | -0.35304700 |
| 2548 | H           | -0.98158800 | -2.56829000 | 4.75370600  | 2592 | C | -4.10757500 | 2.47773800  | -0.26360900 |
| 2549 | H           | 1.31526400  | -2.51771800 | 4.45863600  | 2593 | O | -6.48547400 | 2.51001200  | 0.29368900  |
| 2550 | H           | 0.82563900  | -1.28948600 | 3.36352900  | 2594 | C | 6.06899200  | -2.96262100 | -2.94127800 |
| 2551 | H           | 1.90510700  | -0.82700400 | 6.19728700  | 2595 | C | 1.76653400  | 7.34738700  | -2.14749600 |
| 2552 | H           | 2.88041500  | -0.81566200 | 4.74227300  | 2596 | C | -3.32535500 | -6.35207800 | -3.18765400 |
| 2553 | H           | 0.74559300  | 1.27454400  | 5.44648200  | 2597 | C | -6.56496400 | 3.89496000  | -0.03109300 |
| 2554 | H           | 2.47744800  | 1.41180100  | 5.62088100  | 2598 | H | 3.87307300  | 1.63792500  | -0.26647700 |
| 2555 | H           | 2.22405600  | 2.55828300  | 3.66963400  | 2599 | H | 5.91847800  | 0.52050200  | -1.09066900 |
| 2556 | H           | 2.60049900  | 0.97843500  | 3.02740600  | 2600 | H | 1.51976000  | -1.68305100 | -1.69432400 |
| 2557 | H           | -0.27362400 | 2.11474600  | 3.29863800  | 2601 | H | 3.54745400  | -2.77155900 | -2.52710000 |
| 2558 | H           | 0.71311100  | 2.21333500  | 1.82199700  | 2602 | H | 0.04021400  | 3.07795700  | 1.30815700  |
| 2559 |             |             |             |             | 2603 | H | 0.07391600  | 5.52302200  | 0.91775400  |
| 2560 | <b>2TS5</b> |             |             |             | 2604 | H | 2.26846000  | 2.49278300  | -2.33890200 |
| 2561 | N           | -0.29283900 | 0.18235400  | -1.12774200 | 2605 | H | 2.28484500  | 4.90671200  | -2.72512600 |
| 2562 | P           | 1.02350900  | 0.79493800  | -0.19530300 | 2606 | H | -0.19501600 | -3.19734500 | 0.47361900  |
| 2563 | P           | -1.36430100 | -0.58198000 | -0.01298700 | 2607 | H | -0.58939200 | -5.44514800 | -0.49111800 |
| 2564 | Cr          | 0.04766200  | -0.18259400 | 1.99606300  | 2608 | H | -3.38562100 | -1.62259100 | -1.96434200 |
| 2565 | C           | -0.50665600 | 0.37818100  | -2.56731300 | 2609 | H | -3.76119500 | -3.84219300 | -2.92116000 |
| 2566 | C           | 2.52924400  | 0.06792300  | -0.93126900 | 2610 | H | -4.16279300 | -1.28913600 | 0.67450900  |
| 2567 | C           | 1.14988300  | 2.58953600  | -0.49068100 | 2611 | H | -6.22700800 | 0.06130500  | 0.84486000  |
| 2568 | C           | -1.75510500 | -2.22917100 | -0.68001200 | 2612 | H | -2.02698900 | 2.20644100  | -0.68006500 |
| 2569 | C           | -2.93127700 | 0.35299300  | -0.03298800 | 2613 | H | -4.07895100 | 3.52714500  | -0.53271000 |
| 2570 | C           | 3.79173600  | 0.67246500  | -0.75710700 | 2614 | H | -1.02388600 | 1.32073500  | -2.77893900 |
| 2571 | C           | 4.94567000  | 0.05608300  | -1.21569000 | 2615 | H | 0.45697400  | 0.37808900  | -3.08455600 |
| 2572 | C           | 4.87702100  | -1.19151900 | -1.86174300 | 2616 | H | -1.10225200 | -0.44989800 | -2.96309400 |

|      |             |             |             |             |      |   |             |             |             |
|------|-------------|-------------|-------------|-------------|------|---|-------------|-------------|-------------|
| 2617 | H           | 7.11445500  | -3.16223500 | -3.17812800 | 2661 | C | 1.08225900  | 0.38835900  | 4.49812400  |
| 2618 | H           | 5.68356300  | -3.75846100 | -2.29212300 | 2662 | C | 4.77834000  | 0.87987000  | 3.14937900  |
| 2619 | H           | 5.48459300  | -2.92902500 | -3.86896100 | 2663 | C | 3.58421100  | 0.91006100  | 4.11832400  |
| 2620 | H           | 1.60851800  | 8.41788500  | -2.01441600 | 2664 | C | 2.33190600  | 0.17516200  | 3.61889300  |
| 2621 | H           | 2.84224300  | 7.13523600  | -2.15915100 | 2665 | C | 5.29181900  | -0.51610200 | 2.75047300  |
| 2622 | H           | 1.31623900  | 7.02642100  | -3.09452400 | 2666 | C | 5.76736900  | -1.37942000 | 3.92501900  |
| 2623 | H           | -3.23819300 | -7.41974300 | -3.39041800 | 2667 | C | -1.11733200 | -0.14261300 | -2.49821400 |
| 2624 | H           | -4.32533800 | -6.13513800 | -2.79358300 | 2668 | C | -2.40924700 | 1.83241700  | 0.11814300  |
| 2625 | H           | -3.16332000 | -5.78941500 | -4.11488300 | 2669 | C | -3.15280400 | -0.98136600 | 0.12980200  |
| 2626 | H           | -7.60287500 | 4.17991500  | 0.14344200  | 2670 | C | 1.95824200  | 0.96162500  | -1.34217700 |
| 2627 | H           | -5.90899800 | 4.49329000  | 0.61311700  | 2671 | C | 1.51078800  | -1.89646500 | -1.06183000 |
| 2628 | H           | -6.30963100 | 4.07260000  | -1.08300300 | 2672 | C | -3.57829900 | 2.21568600  | 0.80740200  |
| 2629 | C           | -1.39212600 | -1.33156300 | 2.99008100  | 2673 | C | -4.02744000 | 3.52641800  | 0.77153700  |
| 2630 | C           | -0.42803500 | -1.01876400 | 4.02267600  | 2674 | C | -3.31733500 | 4.50189000  | 0.04781700  |
| 2631 | C           | 0.46877300  | -2.14338500 | 4.56375100  | 2675 | C | -1.70109700 | 2.81622900  | -0.58615400 |
| 2632 | C           | 1.51712100  | -2.66298200 | 3.54503700  | 2676 | C | -2.14665700 | 4.13809200  | -0.63360700 |
| 2633 | C           | 2.98124400  | -2.34489900 | 3.89748700  | 2677 | O | -3.84302300 | 5.74754600  | 0.07262700  |
| 2634 | C           | 3.34606000  | -0.87698100 | 4.18931000  | 2678 | C | -3.10757300 | -2.22501000 | 0.79326900  |
| 2635 | C           | 3.05960500  | 0.15697800  | 3.07701200  | 2679 | C | -4.13806500 | -3.14228700 | 0.66622400  |
| 2636 | C           | 1.69216000  | 0.85570000  | 3.16982100  | 2680 | C | -5.25688900 | -2.84088100 | -0.13284400 |
| 2637 | H           | -2.35392200 | -0.81952400 | 3.01173700  | 2681 | C | -4.27537200 | -0.69303500 | -0.66314700 |
| 2638 | H           | -1.45014800 | -2.35706900 | 2.62601000  | 2682 | C | -5.31996400 | -1.60640500 | -0.79911500 |
| 2639 | H           | 0.57990600  | -0.12460300 | 3.60524000  | 2683 | O | -6.20950700 | -3.79552300 | -0.18836100 |
| 2640 | H           | -0.79425700 | -0.32939000 | 4.79005400  | 2684 | C | 2.27909400  | 2.16072100  | -0.67289900 |
| 2641 | H           | 0.98049900  | -1.78864900 | 5.46521800  | 2685 | C | 3.03462500  | 3.14618100  | -1.28867900 |
| 2642 | H           | -0.18112100 | -2.96435800 | 4.88866900  | 2686 | C | 3.49670300  | 2.96118000  | -2.60479500 |
| 2643 | H           | 1.42515000  | -3.74959000 | 3.43190100  | 2687 | C | 2.42820400  | 0.79013000  | -2.65444600 |
| 2644 | H           | 1.29312400  | -2.26009200 | 2.54013200  | 2688 | C | 3.18757400  | 1.77252300  | -3.28669800 |
| 2645 | H           | 3.25594700  | -2.93932400 | 4.77956000  | 2689 | O | 4.22681500  | 3.97454800  | -3.11647700 |
| 2646 | H           | 3.61680800  | -2.71037400 | 3.07897300  | 2690 | C | 2.89071800  | -2.16433000 | -1.17318900 |
| 2647 | H           | 2.86007600  | -0.54407900 | 5.11734200  | 2691 | C | 3.34603900  | -3.43904600 | -1.47251500 |
| 2648 | H           | 4.42088400  | -0.86169200 | 4.40758700  | 2692 | C | 2.43439900  | -4.49256200 | -1.66746900 |
| 2649 | H           | 3.82850600  | 0.94040600  | 3.14313800  | 2693 | C | 0.61210100  | -2.95752400 | -1.24328200 |
| 2650 | H           | 3.20234600  | -0.30741700 | 2.09134400  | 2694 | C | 1.05890100  | -4.24312400 | -1.55226200 |
| 2651 | H           | 1.55202800  | 1.24148900  | 4.18966800  | 2695 | O | 2.98107000  | -5.69413900 | -1.95981800 |
| 2652 | H           | 1.65558200  | 1.73955900  | 2.52556800  | 2696 | C | -3.18150100 | 6.78991900  | -0.63804500 |
| 2653 |             |             |             |             | 2697 | C | -7.38463300 | -3.55748000 | -0.96095300 |
| 2654 | <b>2SC3</b> |             |             |             | 2698 | C | 4.74999600  | 3.85433100  | -4.43830100 |
| 2655 | N           | -0.70899400 | -0.13171500 | -1.08688900 | 2699 | C | 2.12099700  | -6.81095700 | -2.16703300 |
| 2656 | P           | -1.73344700 | 0.14504300  | 0.28395700  | 2700 | H | -1.48267500 | 1.25919900  | 3.67202100  |
| 2657 | P           | 0.91075100  | -0.26445800 | -0.49750100 | 2701 | H | 4.94791100  | -1.63733200 | 4.60640100  |
| 2658 | Cr          | 0.07396400  | -0.10131000 | 1.87526400  | 2702 | H | -0.08002400 | -1.47065700 | 4.12611000  |
| 2659 | C           | -1.31349900 | 0.18861500  | 3.55318500  | 2703 | H | 0.84108000  | 1.45934200  | 4.54185700  |
| 2660 | C           | -0.10371600 | -0.38959400 | 3.95612400  | 2704 | H | 5.60321600  | 1.44329700  | 3.60588200  |

|      |     |             |             |             |      |    |             |             |             |
|------|-----|-------------|-------------|-------------|------|----|-------------|-------------|-------------|
| 2705 | H   | 4.50574500  | 1.42990400  | 2.23617900  | 2749 | N  | 1.01138300  | 0.12448500  | -0.81367300 |
| 2706 | H   | 3.86801400  | 0.47540900  | 5.08567700  | 2750 | P  | 1.82146200  | -0.61937000 | 0.52756100  |
| 2707 | H   | 3.32237700  | 1.95730700  | 4.32145000  | 2751 | P  | -0.55157700 | 0.73386100  | -0.38049900 |
| 2708 | H   | 2.14008100  | 0.53670900  | 2.57959000  | 2752 | Cr | -0.14460600 | 0.06611600  | 2.11358800  |
| 2709 | H   | 2.53681400  | -0.90070900 | 3.53123700  | 2753 | C  | -0.17018800 | -0.12097900 | 4.42720900  |
| 2710 | H   | 1.30710300  | 0.08156600  | 5.52949900  | 2754 | C  | -1.44213700 | 0.31902200  | 4.18510400  |
| 2711 | H   | -2.21505200 | -0.41206800 | 3.47095400  | 2755 | C  | -2.66901100 | -0.55730300 | 4.16101100  |
| 2712 | H   | 6.20263600  | -2.31965400 | 3.56905400  | 2756 | C  | -5.93679200 | -0.87129200 | 1.96856800  |
| 2713 | H   | 6.53473600  | -0.86054800 | 4.51214000  | 2757 | C  | -4.93756700 | -1.10643900 | 3.11540000  |
| 2714 | H   | 4.51509900  | -1.05625400 | 2.18996100  | 2758 | C  | -3.68050900 | -0.22750000 | 3.04905600  |
| 2715 | H   | 6.12350800  | -0.38066200 | 2.04698400  | 2759 | C  | -6.58702000 | 0.52332100  | 1.91712900  |
| 2716 | H   | -4.14826500 | 1.48037200  | 1.36825800  | 2760 | C  | -7.44815300 | 0.86559100  | 3.13893300  |
| 2717 | H   | -4.93032100 | 3.82597200  | 1.29382300  | 2761 | C  | 1.53175100  | 0.13343200  | -2.19111900 |
| 2718 | H   | -0.78689900 | 2.55667800  | -1.11213500 | 2762 | C  | 1.99575200  | -2.39125100 | 0.10531300  |
| 2719 | H   | -1.58086900 | 4.86880500  | -1.19963900 | 2763 | C  | 3.51861100  | 0.04462900  | 0.54898500  |
| 2720 | H   | -2.25550700 | -2.47264900 | 1.42226200  | 2764 | C  | -1.76990500 | -0.01620000 | -1.51349100 |
| 2721 | H   | -4.11329500 | -4.09685400 | 1.18178900  | 2765 | C  | -0.51228900 | 2.50961500  | -0.81912000 |
| 2722 | H   | -4.34812400 | 0.26291000  | -1.17312200 | 2766 | C  | 2.97216700  | -3.19158800 | 0.73348500  |
| 2723 | H   | -6.17275700 | -1.34933500 | -1.41635900 | 2767 | C  | 3.02115100  | -4.55979200 | 0.51481400  |
| 2724 | H   | 1.93466900  | 2.32205600  | 0.34615800  | 2768 | C  | 2.08833100  | -5.17727300 | -0.33760800 |
| 2725 | H   | 3.29155100  | 4.06686500  | -0.77497700 | 2769 | C  | 1.06065500  | -3.02114600 | -0.72721900 |
| 2726 | H   | 2.21413200  | -0.12904900 | -3.19191900 | 2770 | C  | 1.10307400  | -4.39729900 | -0.95948300 |
| 2727 | H   | 3.53546900  | 1.60521000  | -4.29929800 | 2771 | O  | 2.22684700  | -6.51530000 | -0.48733700 |
| 2728 | H   | 3.61585200  | -1.36753500 | -1.03415200 | 2772 | C  | 3.79174200  | 1.14694500  | 1.38505900  |
| 2729 | H   | 4.40652100  | -3.64945800 | -1.56637800 | 2773 | C  | 5.04545200  | 1.73613600  | 1.41109100  |
| 2730 | H   | -0.45674300 | -2.78361200 | -1.15406400 | 2774 | C  | 6.07744200  | 1.23359400  | 0.59699400  |
| 2731 | H   | 0.33409600  | -5.03495300 | -1.70129300 | 2775 | C  | 4.55954400  | -0.44871600 | -0.25432100 |
| 2732 | H   | -0.44560000 | -0.78915200 | -3.06999500 | 2776 | C  | 5.82695300  | 0.13257200  | -0.23747600 |
| 2733 | H   | -2.12901500 | -0.55111100 | -2.58238200 | 2777 | O  | 7.26341400  | 1.87189300  | 0.69607500  |
| 2734 | H   | -1.10348300 | 0.86212400  | -2.93569900 | 2778 | C  | -2.48812600 | -1.14715700 | -1.07358700 |
| 2735 | H   | -3.78064900 | 7.68594500  | -0.47321500 | 2779 | C  | -3.38857800 | -1.79569700 | -1.90446100 |
| 2736 | H   | -2.16737300 | 6.95352000  | -0.25310000 | 2780 | C  | -3.60392100 | -1.32592600 | -3.21309700 |
| 2737 | H   | -3.13685600 | 6.57367400  | -1.71258500 | 2781 | C  | -1.99638700 | 0.44075700  | -2.82143700 |
| 2738 | H   | -7.99791100 | -4.45157000 | -0.84644500 | 2782 | C  | -2.90070100 | -0.19884600 | -3.66807300 |
| 2739 | H   | -7.93526700 | -2.68601800 | -0.58718800 | 2783 | O  | -4.50294700 | -2.02105700 | -3.94298800 |
| 2740 | H   | -7.14120500 | -3.41431700 | -2.02058400 | 2784 | C  | -1.70713400 | 3.22710400  | -1.03291200 |
| 2741 | H   | 5.30065500  | 4.77726400  | -4.62154200 | 2785 | C  | -1.68850400 | 4.59875600  | -1.23358200 |
| 2742 | H   | 5.43195600  | 2.99948700  | -4.51877900 | 2786 | C  | -0.47055100 | 5.30225900  | -1.22262900 |
| 2743 | H   | 3.94527600  | 3.75596500  | -5.17676800 | 2787 | C  | 0.69347000  | 3.22396100  | -0.79383800 |
| 2744 | H   | 2.77839000  | -7.65422500 | -2.38080000 | 2788 | C  | 0.72517400  | 4.60436700  | -1.00100700 |
| 2745 | H   | 1.52805300  | -7.02879300 | -1.27021400 | 2789 | O  | -0.56154400 | 6.63580900  | -1.43385600 |
| 2746 | H   | 1.45120000  | -6.64510100 | -3.01974000 | 2790 | C  | 1.31752000  | -7.21013600 | -1.33446200 |
| 2747 |     |             |             |             | 2791 | C  | 8.36545600  | 1.40943900  | -0.08189900 |
| 2748 | 2P' |             |             |             | 2792 | C  | -4.79152900 | -1.59690600 | -5.27363600 |



2793 C 0.63074100 7.41475900 -1.43443400  
2794 H 0.03596400 -1.17463800 4.61323600  
2795 H -6.85644100 0.91896300 4.06035400  
2796 H -1.62216300 1.39644900 4.15926600  
2797 H -2.37201800 -1.61347500 4.10786300  
2798 H -6.73164600 -1.62570800 2.04551500  
2799 H -5.42828000 -1.06147900 1.01199300  
2800 H -5.43339000 -0.95273400 4.08328900  
2801 H -4.63078800 -2.16200200 3.09999600  
2802 H -3.20046900 -0.35439900 2.06569100  
2803 H -3.95505000 0.83348700 3.11845700  
2804 H -3.17108800 -0.43249400 5.13359600  
2805 H 0.63429800 0.57795500 4.65282300  
2806 H -7.94065500 1.83583200 3.01163200  
2807 H -8.23147900 0.11329300 3.29263400  
2808 H -5.81474400 1.29399200 1.78404900  
2809 H -7.21221600 0.57228200 1.01606600  
2810 H 3.70742400 -2.74040800 1.39398900  
2811 H 3.77563100 -5.17841300 0.99008900  
2812 H 0.28323200 -2.43679100 -1.21127900  
2813 H 0.37178400 -4.84610200 -1.62163800  
2814 H 3.00911000 1.54322700 2.02857300  
2815 H 5.26206700 2.57972900 2.05848100  
2816 H 4.38935700 -1.30981900 -0.89368600  
2817 H 6.60723000 -0.27661100 -0.86842100  
2818 H -2.34002800 -1.52255800 -0.06353000  
2819 H -3.94714100 -2.66305400 -1.56768500  
2820 H -1.47124900 1.31786200 -3.18762300  
2821 H -3.05198300 0.18427300 -4.67043100  
2822 H -2.66099300 2.70736800 -1.05187800  
2823 H -2.60475700 5.15431400 -1.40574600  
2824 H 1.62928800 2.70085500 -0.61673500  
2825 H 1.67802800 5.12067900 -0.98924800  
2826 H 1.19596600 1.03841400 -2.70507100  
2827 H 2.62503100 0.14774100 -2.16997700  
2828 H 1.19906200 -0.74255900 -2.75884700  
2829 H 1.62040600 -8.25709200 -1.29802600  
2830 H 0.28555400 -7.11637200 -0.97394300  
2831 H 1.37940700 -6.84852500 -2.36839900  
2832 H 9.19874100 2.06651700 0.16836800  
2833 H 8.62567900 0.37534000 0.17384100  
2834 H 8.15241800 1.48186600 -1.15524300  
2835 H -5.53749300 -2.29716900 -5.65041000  
2836 H -5.20465300 -0.58120300 -5.28590700

2837 H -3.89762500 -1.63931300 -5.90761000  
2838 H 0.31325600 8.44118800 -1.62091400  
2839 H 1.14215400 7.36140100 -0.46533000  
2840 H 1.31580900 7.09470500 -2.22928100  
2841

2842 **2INT6**

2843 N 0.47491700 -0.05744800 -1.02738200  
2844 P -0.95436300 0.64176200 -0.36163100  
2845 P 1.53543500 -0.67656500 0.19887000  
2846 Cr -0.48065000 -0.06534000 2.09842100  
2847 C -1.60305000 1.43874800 2.92666900  
2848 C -3.07508800 1.72795400 2.60690000  
2849 C -4.07407300 1.12423800 3.61316400  
2850 C -3.86690700 -0.36934700 3.90179500  
2851 C -3.93289400 -1.26244400 2.65608100  
2852 C -3.36059800 -2.67117500 2.86390700  
2853 C -1.85955200 -2.71286600 3.19879600  
2854 C -0.92833500 -2.09380500 2.15242600  
2855 C 0.59198500 -0.56153400 4.55056700  
2856 C 1.37011700 0.33655700 3.92079200  
2857 C 0.84853600 0.04024900 -2.44868100  
2858 C -0.81654100 2.45226700 -0.58977600  
2859 C -2.33384300 0.12408400 -1.43437600  
2860 C 3.15409400 0.15011700 -0.02807700  
2861 C 1.84289400 -2.41571300 -0.28098800  
2862 C 0.44116300 3.06275700 -0.69059500  
2863 C 0.57433200 4.45062500 -0.76249800  
2864 C -0.56853400 5.26196600 -0.72022100  
2865 C -1.95579800 3.28325400 -0.53764000  
2866 C -1.83614500 4.66233900 -0.60440200  
2867 O -0.56284700 6.61237400 -0.78544400  
2868 C -2.69837100 0.83109400 -2.59245100  
2869 C -3.71199400 0.37369000 -3.43321200  
2870 C -4.38846400 -0.81735800 -3.12592100  
2871 C -3.02494200 -1.07026300 -1.14156000  
2872 C -4.03359400 -1.53581300 -1.96916400  
2873 O -5.38383400 -1.35086900 -3.86463200  
2874 C 3.45336800 1.27801300 0.76475400  
2875 C 4.64568200 1.96998400 0.61660700  
2876 C 5.59093100 1.54888500 -0.33611300  
2877 C 4.10878500 -0.25564200 -0.97480300  
2878 C 5.31383400 0.42719100 -1.13391000  
2879 O 6.72289600 2.28258700 -0.40109100  
2880 C 2.95581300 -3.10919500 0.23868100

2881 C 3.13240200 -4.46220800 -0.00601400  
2882 C 2.19626300 -5.17208800 -0.77941100  
2883 C 0.90879600 -3.13840300 -1.03517400  
2884 C 1.07987500 -4.49964200 -1.29591400  
2885 O 2.46432100 -6.48577500 -0.96334400  
2886 C 0.68387400 7.29129500 -0.90437500  
2887 C -5.80912700 -0.67420500 -5.04622800  
2888 C 7.74073900 1.90536700 -1.32634500  
2889 C 1.55918700 -7.27169200 -1.73218600  
2890 H -1.43024800 1.45164600 4.01241200  
2891 H -3.23661600 2.81603400 2.58790300  
2892 H -3.32243000 1.38415700 1.59339900  
2893 H -3.99769900 1.67702500 4.55952700  
2894 H -5.09342700 1.29497000 3.24066200  
2895 H -2.89287000 -0.49269200 4.39212800  
2896 H -1.57484900 -3.77024700 3.32068300  
2897 H -1.68381700 -2.26149000 4.18486300  
2898 H -3.53141000 -3.26528300 1.95459000  
2899 H -3.91251400 -3.17981400 3.66614500  
2900 H -4.61270000 -0.70739700 4.63357400  
2901 H -0.95338400 2.22594200 2.48970100  
2902 H 0.83183400 -1.62089700 4.54624300  
2903 H -0.27650600 -0.26052400 5.12894800  
2904 H -3.38314100 -0.78582000 1.83439900  
2905 H -4.97449200 -1.33584000 2.31505000  
2906 H -1.24022800 -2.34826900 1.13031700  
2907 H 0.09870400 -2.46818300 2.27578100  
2908 H 2.27689900 0.03712000 3.40284600  
2909 H 1.16788600 1.40399900 3.98249700  
2910 H 1.34016100 2.45526700 -0.72062800  
2911 H 1.56363900 4.88334100 -0.85567400  
2912 H -2.94727700 2.84879300 -0.45404800  
2913 H -2.71062700 5.30427100 -0.57335000  
2914 H -2.19423600 1.75859100 -2.84498400  
2915 H -3.96636400 0.94740600 -4.31659800  
2916 H -2.77480500 -1.63702200 -0.25092700  
2917 H -4.57248000 -2.45007200 -1.74263300  
2918 H 2.73876700 1.62267000 1.50827200  
2919 H 4.87964000 2.83381600 1.23058300  
2920 H 3.92084400 -1.12755700 -1.59385600  
2921 H 6.02641800 0.08075000 -1.87329000  
2922 H 3.69993100 -2.58392000 0.83142000  
2923 H 3.99091900 -4.99770100 0.38641500  
2924 H 0.03236800 -2.63658700 -1.43586000

2925 H 0.34365200 -5.02127300 -1.89625000  
2926 H 1.40805200 -0.85238200 -2.74122200  
2927 H -0.05435500 0.08849300 -3.06333600  
2928 H 1.46222300 0.92568100 -2.64870700  
2929 H 0.43962700 8.35341800 -0.93887300  
2930 H 1.32914300 7.09306200 -0.03969300  
2931 H 1.20612700 7.00678400 -1.82611000  
2932 H -6.61277200 -1.28330800 -5.46068200  
2933 H -6.19132900 0.32701200 -4.81420700  
2934 H -4.99397300 -0.59872700 -5.77593100  
2935 H 8.54525500 2.62842500 -1.18956700  
2936 H 8.11570700 0.89692000 -1.11456700  
2937 H 7.37720200 1.95447600 -2.35990000  
2938 H 1.97495500 -8.27979100 -1.73861700  
2939 H 0.56158600 -7.29164100 -1.27614500  
2940 H 1.48489900 -6.90152900 -2.76224300  
2941

2942 **2TS6**

2943 N 0.51911000 0.05694600 -1.15478800  
2944 P 0.32345200 1.43870300 -0.13809200  
2945 P 0.18198200 -1.40917900 -0.29288200  
2946 Cr -0.31777100 0.06138100 1.97748800  
2947 C -1.28113100 1.53107000 3.03312700  
2948 C -2.71276300 1.43323800 2.48529100  
2949 C -3.86323400 1.45794400 3.52219500  
2950 C -3.83758600 0.36302100 4.60405200  
2951 C -3.91668600 -1.09177500 4.07485400  
2952 C -2.93998400 -2.08095000 4.74346500  
2953 C -1.44540300 -1.69705100 4.64205000  
2954 C -0.90576200 -1.61540100 3.21470800  
2955 C 1.12611100 -0.74292000 3.70886200  
2956 C 1.60686700 0.27490200 2.87935400  
2957 C 0.92732500 0.10332300 -2.56845000  
2958 C 1.95893600 2.24340800 0.00343000  
2959 C -0.70646300 2.61963800 -1.07486900  
2960 C 1.57746000 -2.54647200 -0.60319700  
2961 C -1.23088600 -2.17529600 -1.17424500  
2962 C 3.14107500 1.55352300 -0.29262800  
2963 C 4.39466200 2.12916000 -0.07104500  
2964 C 4.48221000 3.41796500 0.47339500  
2965 C 2.06359500 3.53435200 0.56292900  
2966 C 3.30158700 4.11457100 0.79122000  
2967 O 5.63672100 4.07405200 0.73076100  
2968 C -0.17079000 3.63885400 -1.87740400

|      |   |             |             |             |      |    |              |             |             |
|------|---|-------------|-------------|-------------|------|----|--------------|-------------|-------------|
| 2969 | C | -0.99257400 | 4.48697900  | -2.62016000 | 3013 | H  | 3.38685000   | 5.11018800  | 1.21459800  |
| 2970 | C | -2.38527400 | 4.32336900  | -2.57591200 | 3014 | H  | 0.90350500   | 3.78569300  | -1.92377400 |
| 2971 | C | -2.10912200 | 2.46859700  | -1.04532200 | 3015 | H  | -0.54191800  | 5.26496600  | -3.22517600 |
| 2972 | C | -2.93662300 | 3.30038600  | -1.78163400 | 3016 | H  | -2.55797500  | 1.69001300  | -0.43577600 |
| 2973 | O | -3.27424600 | 5.08524400  | -3.24834000 | 3017 | H  | -4.01605700  | 3.19122100  | -1.75585100 |
| 2974 | C | 2.56561300  | -2.70134900 | 0.39013600  | 3018 | H  | 2.46369200   | -2.18234400 | 1.33899600  |
| 2975 | C | 3.66895800  | -3.51600500 | 0.18839300  | 3019 | H  | 4.42711000   | -3.64336400 | 0.95440400  |
| 2976 | C | 3.81971100  | -4.21013900 | -1.02560500 | 3020 | H  | 0.98620400   | -3.17454300 | -2.58571500 |
| 2977 | C | 1.73896900  | -3.25190000 | -1.80696300 | 3021 | H  | 2.93235700   | -4.60396900 | -2.96682700 |
| 2978 | C | 2.84303400  | -4.07391300 | -2.02574200 | 3022 | H  | -0.79932500  | -4.19299700 | -0.49977800 |
| 2979 | O | 4.92506000  | -4.97925300 | -1.12699500 | 3023 | H  | -2.83416100  | -5.18364900 | -1.49375900 |
| 2980 | C | -1.49506900 | -3.55366900 | -1.03628200 | 3024 | H  | -1.99091400  | -0.32569000 | -1.99090900 |
| 2981 | C | -2.63138500 | -4.12196400 | -1.59148400 | 3025 | H  | -3.98894900  | -1.31914000 | -2.99282200 |
| 2982 | C | -3.54713600 | -3.32806600 | -2.30510600 | 3026 | H  | 0.28757800   | -0.55471500 | -3.16436500 |
| 2983 | C | -2.15905100 | -1.39253800 | -1.87386500 | 3027 | H  | 0.81283900   | 1.12130100  | -2.94942900 |
| 2984 | C | -3.30319800 | -1.95450200 | -2.44436800 | 3028 | H  | 1.96997500   | -0.20728900 | -2.69730200 |
| 2985 | O | -4.61803900 | -3.98055100 | -2.81416200 | 3029 | H  | 7.65045700   | 4.14066100  | 0.72617200  |
| 2986 | C | 6.87388900  | 3.43080800  | 0.43971300  | 3030 | H  | 6.99003000   | 2.50844700  | 1.02220500  |
| 2987 | C | -2.79308700 | 6.15312200  | -4.06227000 | 3031 | H  | 6.96348900   | 3.20403300  | -0.62981800 |
| 2988 | C | 5.13981300  | -5.72919900 | -2.32087200 | 3032 | H  | -3.68062300  | 6.62117100  | -4.48876500 |
| 2989 | C | -5.58482500 | -3.24209600 | -3.55433300 | 3033 | H  | -2.24215000  | 6.88959900  | -3.46520800 |
| 2990 | H | -1.20774000 | 1.29212200  | 4.09954400  | 3034 | H  | -2.15274300  | 5.77922700  | -4.87026000 |
| 2991 | H | -2.88155700 | 2.24824900  | 1.77277000  | 3035 | H  | 6.07564300   | -6.26685000 | -2.16627800 |
| 2992 | H | -2.84369900 | 0.51204600  | 1.87398700  | 3036 | H  | 4.32903600   | -6.44792800 | -2.48992400 |
| 2993 | H | -3.85093700 | 2.43747600  | 4.01757700  | 3037 | H  | 5.23655200   | -5.07035300 | -3.19227400 |
| 2994 | H | -4.81359900 | 1.40089500  | 2.97288200  | 3038 | H  | -6.33861900  | -3.96737200 | -3.86240000 |
| 2995 | H | -2.93823300 | 0.49661100  | 5.21607600  | 3039 | H  | -6.05531700  | -2.46807900 | -2.93530800 |
| 2996 | H | -0.85580800 | -2.42533700 | 5.21191800  | 3040 | H  | -5.13842200  | -2.77999000 | -4.44357100 |
| 2997 | H | -1.30891600 | -0.73700500 | 5.15362000  | 3041 |    |              |             |             |
| 2998 | H | -3.09274600 | -3.08003700 | 4.31416100  | 3042 |    | <b>2INT7</b> |             |             |
| 2999 | H | -3.18667600 | -2.16426600 | 5.81051500  | 3043 | N  | -0.48698100  | -0.00850900 | -1.20574700 |
| 3000 | H | -4.67483200 | 0.54621600  | 5.28808600  | 3044 | P  | -1.28065200  | -0.92180800 | 0.01968200  |
| 3001 | H | -0.83370600 | 2.51657400  | 2.86818100  | 3045 | P  | 0.81498300   | 0.95614900  | -0.56902300 |
| 3002 | H | 1.59063600  | 1.30534100  | 3.22526900  | 3046 | Cr | 0.27265200   | -0.22431800 | 1.85009000  |
| 3003 | H | 2.32553700  | 0.05026600  | 2.09491300  | 3047 | C  | 0.55343600   | -1.89159200 | 2.97223800  |
| 3004 | H | -3.75639500 | -1.10680000 | 2.98845700  | 3048 | C  | 2.00692800   | -2.17929400 | 2.55390200  |
| 3005 | H | -4.93424000 | -1.47707100 | 4.21022200  | 3049 | C  | 3.02302000   | -2.43079200 | 3.69659000  |
| 3006 | H | -1.73983300 | -1.36061700 | 2.51976400  | 3050 | C  | 3.21331600   | -1.26775800 | 4.68684900  |
| 3007 | H | -0.50298600 | -2.56569100 | 2.85566200  | 3051 | C  | 3.91627300   | -0.02720300 | 4.09762300  |
| 3008 | H | 0.74365900  | -0.49314300 | 4.69126600  | 3052 | C  | 3.64189800   | 1.29795300  | 4.84204500  |
| 3009 | H | 1.49750000  | -1.75706700 | 3.60171400  | 3053 | C  | 2.15034700   | 1.63275400  | 5.05682800  |
| 3010 | H | 3.09582700  | 0.54821100  | -0.70088800 | 3054 | C  | 1.27525900   | 1.53962700  | 3.79483300  |
| 3011 | H | 5.28714900  | 1.56900400  | -0.32470000 | 3055 | C  | -0.24083300  | 1.42524600  | 4.07324800  |
| 3012 | H | 1.16801000  | 4.09705900  | 0.81372900  | 3056 | C  | -1.02998700  | 0.99867100  | 2.83082400  |

|      |   |             |             |             |      |   |             |             |             |
|------|---|-------------|-------------|-------------|------|---|-------------|-------------|-------------|
| 3057 | C | -0.90052100 | 0.00766800  | -2.61944100 | 3101 | H | -0.13436500 | -2.71275600 | 2.75279800  |
| 3058 | C | -2.98667700 | -0.30477400 | 0.16292300  | 3102 | H | -1.96991800 | 0.48906900  | 3.06264100  |
| 3059 | C | -1.41462100 | -2.63468700 | -0.57904500 | 3103 | H | -1.23700500 | 1.83053400  | 2.14361600  |
| 3060 | C | 0.53694700  | 2.67262000  | -1.12143800 | 3104 | H | 3.63614000  | 0.09636100  | 3.04265400  |
| 3061 | C | 2.29267600  | 0.40234400  | -1.49931100 | 3105 | H | 4.99957900  | -0.20085400 | 4.08099800  |
| 3062 | C | -3.32375500 | 0.98587300  | -0.26552700 | 3106 | H | 1.62864000  | 0.63303700  | 3.25593000  |
| 3063 | C | -4.60480600 | 1.50325800  | -0.06866000 | 3107 | H | 1.48181700  | 2.37724400  | 3.11504000  |
| 3064 | C | -5.57401400 | 0.73008300  | 0.58710300  | 3108 | H | -0.38981400 | 0.68169700  | 4.86584400  |
| 3065 | C | -3.96621600 | -1.06506400 | 0.83606800  | 3109 | H | -0.60318100 | 2.38223000  | 4.47676800  |
| 3066 | C | -5.23928400 | -0.55899000 | 1.04229600  | 3110 | H | -2.58233800 | 1.60597000  | -0.76068800 |
| 3067 | O | -6.84353800 | 1.12401800  | 0.83056500  | 3111 | H | -4.83450300 | 2.50046000  | -0.42528100 |
| 3068 | C | -2.50776600 | -3.09662100 | -1.32985300 | 3112 | H | -3.73445700 | -2.06398800 | 1.19524700  |
| 3069 | C | -2.54915200 | -4.40011600 | -1.82346800 | 3113 | H | -5.99993600 | -1.14052600 | 1.55299000  |
| 3070 | C | -1.48098900 | -5.27512900 | -1.57064000 | 3114 | H | -3.34779600 | -2.43798000 | -1.52719500 |
| 3071 | C | -0.35018100 | -3.52791200 | -0.33511400 | 3115 | H | -3.41018300 | -4.72328300 | -2.39659300 |
| 3072 | C | -0.37792500 | -4.82424500 | -0.82110300 | 3116 | H | 0.50787100  | -3.20433200 | 0.24678900  |
| 3073 | O | -1.41502300 | -6.55480700 | -1.99274700 | 3117 | H | 0.43390700  | -5.51821500 | -0.62876000 |
| 3074 | C | 0.05079300  | 3.61510600  | -0.19227500 | 3118 | H | -0.10860900 | 3.32190800  | 0.84156200  |
| 3075 | C | -0.21881200 | 4.92178200  | -0.56938400 | 3119 | H | -0.58516200 | 5.65257000  | 0.14434000  |
| 3076 | C | -0.00902100 | 5.32985800  | -1.89887200 | 3120 | H | 1.14451300  | 2.40300400  | -3.17925900 |
| 3077 | C | 0.74873800  | 3.09699100  | -2.44377000 | 3121 | H | 0.65717200  | 4.69904500  | -3.86606200 |
| 3078 | C | 0.47991500  | 4.40635400  | -2.83777200 | 3122 | H | 3.36161900  | 2.28153700  | -1.30888300 |
| 3079 | O | -0.30026400 | 6.62073200  | -2.16809200 | 3123 | H | 5.44044300  | 1.44279700  | -2.35153600 |
| 3080 | C | 3.40985400  | 1.24999100  | -1.64596300 | 3124 | H | 1.56590300  | -1.60401300 | -1.83571400 |
| 3081 | C | 4.58065800  | 0.79172900  | -2.23039000 | 3125 | H | 3.61990300  | -2.41900700 | -2.88753200 |
| 3082 | C | 4.67539200  | -0.53470600 | -2.68796200 | 3126 | H | -0.01568600 | -0.01247200 | -3.26231100 |
| 3083 | C | 2.40545500  | -0.92239600 | -1.94338200 | 3127 | H | -1.49635500 | -0.88239000 | -2.83851000 |
| 3084 | C | 3.57621500  | -1.39295400 | -2.54109200 | 3128 | H | -1.49235200 | 0.89833800  | -2.85685200 |
| 3085 | O | 5.85732400  | -0.87856300 | -3.24990500 | 3129 | H | -8.30263700 | 2.50795600  | 0.70611300  |
| 3086 | C | -7.25862100 | 2.41887100  | 0.40448500  | 3130 | H | -6.66949500 | 3.20582500  | 0.89104900  |
| 3087 | C | -2.50211000 | -7.09556600 | -2.74193600 | 3131 | H | -7.18319700 | 2.52249100  | -0.68493800 |
| 3088 | C | -0.09370600 | 7.11707100  | -3.48899600 | 3132 | H | -2.22708500 | -8.12885700 | -2.95465000 |
| 3089 | C | 6.02649000  | -2.20488800 | -3.74013600 | 3133 | H | -3.43188900 | -7.07650000 | -2.16115900 |
| 3090 | H | 0.44792100  | -1.61238600 | 4.02685700  | 3134 | H | -2.64318900 | -6.55332600 | -3.68456900 |
| 3091 | H | 2.03214500  | -3.04178300 | 1.87661700  | 3135 | H | -0.38594500 | 8.16701500  | -3.45770300 |
| 3092 | H | 2.42134700  | -1.34854300 | 1.92906200  | 3136 | H | 0.96005700  | 7.03971900  | -3.78223100 |
| 3093 | H | 2.68839800  | -3.31701500 | 4.25039500  | 3137 | H | -0.71925500 | 6.58538100  | -4.21621500 |
| 3094 | H | 3.99100500  | -2.69044000 | 3.24607700  | 3138 | H | 7.03987600  | -2.24488100 | -4.14084000 |
| 3095 | H | 2.23220800  | -0.99520200 | 5.09311700  | 3139 | H | 5.92314100  | -2.94376800 | -2.93577000 |
| 3096 | H | 2.06234100  | 2.64372100  | 5.47488500  | 3140 | H | 5.30925900  | -2.42916500 | -4.53940000 |
| 3097 | H | 1.73235600  | 0.96038900  | 5.81611600  | 3141 |   |             |             |             |
| 3098 | H | 4.12624700  | 2.11201300  | 4.28628200  | 3142 |   |             |             |             |
| 3099 | H | 4.12588900  | 1.27352800  | 5.82693500  |      |   |             |             |             |
| 3100 | H | 3.78924800  | -1.63009500 | 5.54758900  | 3143 |   |             |             |             |
